# Supplementary material for: RNA sequencing least shrew (Cryptotis parva) brainstem and gut transcripts following administration of a selective substance P neurokinin NK1 receptor agonist and antagonist expands genomics resources for emesis research
Source: Front Genet. 2023 Feb 14;14:975087. doi: 10.3389/fgene.2023.975087 (PMC9972295; doi:10.3389/fgene.2023.975087)
Supplement: Supplementary file 10 [file Table8.XLSX]

## Sheet: Sheet0
Phenotype Enrichment of Top 10% Most Conserved Orthologs
refer to Table 7
Phenotype Name	Phenotype ID	% of genes with the term in "MOST-CONSERVED-697"	% of genes with the term in "Background"	Fisher's Exact Test P-value	BH FDR corrected P-value	Bonferroni corrected P-value
■ mortality/aging	MP:0010768	69.16% (323/467)	45.93% (5155/11223)	2.493e-23	6.98e-22	6.9804e-22
└ abnormal survival	MP:0010769	68.09% (318/467)	41.76% (4687/11223)	2.268e-29	1.588e-27	1.5876e-27
├ preweaning lethality	MP:0010770	63.6% (297/467)	37.49% (4208/11223)	5.123e-29	1.609e-26	1.60862e-26
│├ prenatal lethality	MP:0002080	36.19% (169/467)	20.01% (2246/11223)	1.843e-15	1.1e-12	1.10027e-12
││├ embryonic lethality	MP:0008762	27.62% (129/467)	15.43% (1732/11223)	3.955e-11	2.836e-08	2.83574e-08
│││├ embryonic lethality prior to tooth bud stage	MP:0013293	15.42% (72/467)	8.04% (902/11223)	1.876e-07	5.919e-05	0.000118376
││││└ embryonic lethality prior to organogenesis	MP:0013292	14.78% (69/467)	7.24% (812/11223)	3.791e-08	1.653e-05	1.65288e-05
││││ ├ embryonic lethality between implantation and placentation	MP:0009850	8.57% (40/467)	3.78% (424/11223)	3.6e-06	0.0004688	0.001008
││││ │├ embryonic lethality between implantation and somite formation	MP:0006205	6.42% (30/467)	2.56% (287/11223)	1.034e-05	0.0004115	0.00205766
││││ ││└ embryonic lethality between implantation and somite formation, complete penetrance	MP:0011096	6.21% (29/467)	2.33% (262/11223)	5.347e-06	0.0001604	0.00064164
││││ │└ embryonic lethality between somite formation and embryo turning	MP:0006206	1.71% (8/467)	0.77% (86/11223)	0.034	0.199	1
││││ │ └ embryonic lethality between somite formation and embryo turning, complete penetrance	MP:0011097	1.5% (7/467)	0.62% (70/11223)	0.034	0.227	1
││││ └ embryonic lethality before implantation	MP:0006204	3.64% (17/467)	1.72% (193/11223)	0.005	0.1	1
││││ └ embryonic lethality before implantation, complete penetrance	MP:0011094	3.21% (15/467)	1.49% (167/11223)	0.006	0.08	1
│││├ embryonic lethality, complete penetrance	MP:0011092	7.92% (37/467)	3.35% (376/11223)	3.486e-06	0.0003666	0.00219967
│││└ embryonic lethality during organogenesis	MP:0006207	10.92% (51/467)	6.83% (766/11223)	0.0009289	0.039	0.586136
│││ └ embryonic lethality during organogenesis, complete penetrance	MP:0011098	8.99% (42/467)	5.44% (610/11223)	0.001	0.034	0.436
││├ prenatal lethality, complete penetrance	MP:0011091	6.21% (29/467)	2.72% (305/11223)	7.121e-05	0.004	0.0510576
││└ lethality throughout fetal growth and development	MP:0006208	4.93% (23/467)	3.14% (352/11223)	0.027	0.236	1
││ └ lethality throughout fetal growth and development, incomplete penetrance	MP:0011109	2.78% (13/467)	1.56% (175/11223)	0.038	0.316	1
│├ lethality during fetal growth through weaning	MP:0010832	26.98% (126/467)	15.88% (1782/11223)	1.8e-09	3.582e-07	1.0746e-06
││├ perinatal lethality	MP:0002081	16.92% (79/467)	8.8% (988/11223)	3.947e-08	1.415e-05	2.83e-05
│││├ neonatal lethality	MP:0002058	12.85% (60/467)	6.26% (703/11223)	2.874e-07	6.045e-05	0.000181349
││││├ neonatal lethality, complete penetrance	MP:0011087	9.42% (44/467)	4.24% (476/11223)	1.889e-06	0.0002745	0.000823604
││││└ neonatal lethality, incomplete penetrance	MP:0011088	4.07% (19/467)	2.16% (242/11223)	0.009	0.131	1
│││└ perinatal lethality, complete penetrance	MP:0011089	3.21% (15/467)	1.93% (217/11223)	0.046	0.329	1
││├ postnatal lethality	MP:0002082	12.42% (58/467)	8.38% (940/11223)	0.002	0.055	1
│││└ postnatal lethality, incomplete penetrance	MP:0011086	8.57% (40/467)	4.94% (554/11223)	0.0008201	0.039	0.517483
││└ lethality throughout fetal growth and development	MP:0006208	4.93% (23/467)	3.14% (352/11223)	0.027	0.236	1
││ └ lethality throughout fetal growth and development, incomplete penetrance	MP:0011109	2.78% (13/467)	1.56% (175/11223)	0.038	0.316	1
│├ preweaning lethality, complete penetrance	MP:0011100	19.7% (92/467)	11.52% (1293/11223)	4.202e-07	5.017e-05	0.000250859
│└ preweaning lethality, incomplete penetrance	MP:0011110	8.14% (38/467)	5.57% (625/11223)	0.016	0.18	1
├ prenatal lethality	MP:0002080	36.19% (169/467)	20.01% (2246/11223)	1.843e-15	2.894e-13	5.78702e-13
│├ embryonic lethality	MP:0008762	27.62% (129/467)	15.43% (1732/11223)	3.955e-11	1.181e-08	2.36114e-08
││├ embryonic lethality prior to tooth bud stage	MP:0013293	15.42% (72/467)	8.04% (902/11223)	1.876e-07	4.484e-05	0.000134509
│││└ embryonic lethality prior to organogenesis	MP:0013292	14.78% (69/467)	7.24% (812/11223)	3.791e-08	2.392e-05	2.39212e-05
│││ ├ embryonic lethality between implantation and placentation	MP:0009850	8.57% (40/467)	3.78% (424/11223)	3.6e-06	0.0003924	0.0015696
│││ │├ embryonic lethality between implantation and somite formation	MP:0006205	6.42% (30/467)	2.56% (287/11223)	1.034e-05	0.0006804	0.0028952
│││ ││└ embryonic lethality between implantation and somite formation, complete penetrance	MP:0011096	6.21% (29/467)	2.33% (262/11223)	5.347e-06	0.000266	0.00106405
│││ │└ embryonic lethality between somite formation and embryo turning	MP:0006206	1.71% (8/467)	0.77% (86/11223)	0.034	0.257	1
│││ │ └ embryonic lethality between somite formation and embryo turning, complete penetrance	MP:0011097	1.5% (7/467)	0.62% (70/11223)	0.034	0.199	1
│││ └ embryonic lethality before implantation	MP:0006204	3.64% (17/467)	1.72% (193/11223)	0.005	0.109	1
│││ └ embryonic lethality before implantation, complete penetrance	MP:0011094	3.21% (15/467)	1.49% (167/11223)	0.006	0.105	1
││├ embryonic lethality, complete penetrance	MP:0011092	7.92% (37/467)	3.35% (376/11223)	3.486e-06	0.0003124	0.00249946
││└ embryonic lethality during organogenesis	MP:0006207	10.92% (51/467)	6.83% (766/11223)	0.0009289	0.035	0.666021
││ └ embryonic lethality during organogenesis, complete penetrance	MP:0011098	8.99% (42/467)	5.44% (610/11223)	0.001	0.039	0.631
│├ prenatal lethality, complete penetrance	MP:0011091	6.21% (29/467)	2.72% (305/11223)	7.121e-05	0.004	0.0425124
│└ lethality throughout fetal growth and development	MP:0006208	4.93% (23/467)	3.14% (352/11223)	0.027	0.224	1
│ └ lethality throughout fetal growth and development, incomplete penetrance	MP:0011109	2.78% (13/467)	1.56% (175/11223)	0.038	0.252	1
├ perinatal lethality	MP:0002081	16.92% (79/467)	8.8% (988/11223)	3.947e-08	4.131e-06	1.23936e-05
│├ neonatal lethality	MP:0002058	12.85% (60/467)	6.26% (703/11223)	2.874e-07	4.289e-05	0.000171578
││├ neonatal lethality, complete penetrance	MP:0011087	9.42% (44/467)	4.24% (476/11223)	1.889e-06	0.0002599	0.00135441
││└ neonatal lethality, incomplete penetrance	MP:0011088	4.07% (19/467)	2.16% (242/11223)	0.009	0.137	1
│└ perinatal lethality, complete penetrance	MP:0011089	3.21% (15/467)	1.93% (217/11223)	0.046	0.292	1
├ postnatal lethality	MP:0002082	12.42% (58/467)	8.38% (940/11223)	0.002	0.033	0.628
│└ postnatal lethality, incomplete penetrance	MP:0011086	8.57% (40/467)	4.94% (554/11223)	0.0008201	0.025	0.4896
├ premature death	MP:0002083	11.35% (53/467)	8.14% (913/11223)	0.011	0.115	1
└ lethality, complete penetrance	MP:0011400	0.86% (4/467)	0.19% (21/11223)	0.016	0.148	1
■ embryo phenotype	MP:0005380	23.77% (111/467)	14.61% (1640/11223)	2.186e-07	3.06e-06	6.1208e-06
├ abnormal embryo development	MP:0001672	15.2% (71/467)	8.57% (962/11223)	3.449e-06	8.048e-05	0.00024143
│├ abnormal developmental patterning	MP:0002084	7.71% (36/467)	3.75% (421/11223)	7.631e-05	0.002	0.0239613
││├ abnormal gastrulation	MP:0001695	6.0% (28/467)	2.95% (331/11223)	0.0005583	0.019	0.333305
│││├ failure to gastrulate	MP:0001696	2.14% (10/467)	0.4% (45/11223)	5.456e-05	0.003	0.0391195
│││└ abnormal germ layer development	MP:0001674	2.57% (12/467)	1.17% (131/11223)	0.012	0.166	1
│││ └ abnormal ectoderm development	MP:0001675	1.5% (7/467)	0.49% (55/11223)	0.011	0.198	1
│││ └ increased ectoderm apoptosis	MP:0003895	0.43% (2/467)	0.04% (5/11223)	0.029	0.222	1
││├ abnormal rostral-caudal axis patterning	MP:0005221	2.78% (13/467)	0.94% (105/11223)	0.0008474	0.025	0.505898
│││├ rostral-caudal axis duplication	MP:0012156	0.86% (4/467)	0.05% (6/11223)	0.0004357	0.019	0.312397
│││└ rostral body truncation	MP:0012157	0.64% (3/467)	0.12% (14/11223)	0.028	0.236	1
││└ abnormal proximal-distal axis patterning	MP:0001705	0.64% (3/467)	0.09% (10/11223)	0.013	0.158	1
│├ embryonic growth arrest	MP:0001730	4.71% (22/467)	2.4% (269/11223)	0.003	0.041	0.942
│└ embryonic growth retardation	MP:0003984	7.71% (36/467)	4.6% (516/11223)	0.003	0.041	0.942
├ abnormal embryo morphology	MP:0014134	17.99% (84/467)	11.02% (1237/11223)	8.526e-06	0.0001492	0.00059682
│├ abnormal embryonic tissue morphology	MP:0002085	13.28% (62/467)	7.78% (873/11223)	4.612e-05	0.002	0.0144817
││├ abnormal egg cylinder morphology	MP:0003085	1.71% (8/467)	0.35% (39/11223)	0.0004865	0.017	0.29044
││├ abnormal head fold morphology	MP:0011257	0.86% (4/467)	0.09% (10/11223)	0.002	0.044	1
││├ abnormal primitive streak morphology	MP:0002231	2.57% (12/467)	1.01% (113/11223)	0.004	0.07	1
│││├ abnormal primitive streak formation	MP:0002230	1.71% (8/467)	0.45% (50/11223)	0.002	0.055	1
│││├ abnormal anterior primitive streak morphology	MP:0012739	0.43% (2/467)	0.04% (5/11223)	0.029	0.236	1
│││└ abnormal primitive node morphology	MP:0004066	1.07% (5/467)	0.49% (55/11223)	0.091	0.368	1
│││ └ absent primitive node	MP:0009331	0.64% (3/467)	0.13% (15/11223)	0.033	0.306	1
││├ abnormal somite development	MP:0001688	3.21% (15/467)	1.69% (190/11223)	0.018	0.199	1
││├ abnormal neural plate morphology	MP:0005657	0.86% (4/467)	0.2% (22/11223)	0.019	0.199	1
││├ abnormal germ layer morphology	MP:0014138	2.57% (12/467)	1.27% (142/11223)	0.021	0.199	1
│││├ abnormal mesoderm morphology	MP:0014141	2.57% (12/467)	0.98% (110/11223)	0.003	0.069	1
││││├ absent mesoderm	MP:0001683	1.71% (8/467)	0.53% (59/11223)	0.005	0.121	1
││││└ abnormal lateral plate mesoderm morphology	MP:0010117	0.21% (1/467)	0.09% (10/11223)	0.362	1	1
││││ └ abnormal splanchnic mesoderm morphology	MP:0012179	0.21% (1/467)	0.0% (0/11223)	0.04	1	1
│││└ abnormal ectoderm morphology	MP:0014139	0.21% (1/467)	0.28% (31/11223)	0.729	1	1
│││ └ absent ectoderm	MP:0013216	0.21% (1/467)	0.0% (0/11223)	0.04	1	1
││├ abnormal bilaminar embryonic disk morphology	MP:0012103	1.5% (7/467)	0.59% (66/11223)	0.026	0.224	1
│││└ abnormal embryonic epiblast morphology	MP:0003886	1.5% (7/467)	0.55% (62/11223)	0.02	0.228	1
││├ embryo tissue necrosis	MP:0013241	0.86% (4/467)	0.28% (31/11223)	0.05	0.302	1
││├ abnormal neural tube morphology	MP:0002151	5.35% (25/467)	4.09% (459/11223)	0.113	0.432	1
│││└ abnormal neural crest morphology	MP:0009846	0.43% (2/467)	0.23% (26/11223)	0.309	0.621	1
│││ └ abnormal neural crest cell morphology	MP:0009845	0.43% (2/467)	0.21% (24/11223)	0.279	0.643	1
│││ ├ decreased neural crest cell number	MP:0009843	0.43% (2/467)	0.05% (6/11223)	0.038	0.244	1
│││ │└ decreased cardiac neural crest cell number	MP:0012749	0.21% (1/467)	0.0% (0/11223)	0.04	1	1
│││ │ └ absent cardiac neural crest cells	MP:0012750	0.21% (1/467)	0.0% (0/11223)	0.04	1	1
│││ └ abnormal cardiac neural crest cell morphology	MP:0012747	0.21% (1/467)	0.02% (2/11223)	0.115	1	1
│││ └ decreased cardiac neural crest cell number	MP:0012749	0.21% (1/467)	0.0% (0/11223)	0.04	1	1
│││ └ absent cardiac neural crest cells	MP:0012750	0.21% (1/467)	0.0% (0/11223)	0.04	1	1
││├ abnormal anterior definitive endoderm morphology	MP:0008926	0.21% (1/467)	0.02% (2/11223)	0.115	1	1
│││└ absent anterior definitive endoderm	MP:0013185	0.21% (1/467)	0.0% (0/11223)	0.04	1	1
││├ abnormal pharyngeal pouch morphology	MP:0006031	0.21% (1/467)	0.06% (7/11223)	0.278	1	1
│││├ abnormal first pharyngeal pouch morphology	MP:0013222	0.21% (1/467)	0.0% (0/11223)	0.04	1	1
│││└ abnormal ultimobranchial body morphology	MP:0003955	0.21% (1/467)	0.04% (5/11223)	0.217	1	1
│││ └ persistent ultimobranchial bodies	MP:0013290	0.21% (1/467)	0.0% (0/11223)	0.04	1	1
││└ abnormal notochord morphology	MP:0002825	0.64% (3/467)	0.5% (56/11223)	0.421	0.78	1
││ └ split notochord	MP:0004713	0.43% (2/467)	0.04% (4/11223)	0.021	0.228	1
│├ abnormal embryo size	MP:0001697	9.85% (46/467)	5.77% (648/11223)	0.0004737	0.011	0.148742
││└ decreased embryo size	MP:0001698	7.92% (37/467)	4.76% (534/11223)	0.002	0.044	1
│├ abnormal embryonic-extraembryonic boundary morphology	MP:0003890	0.86% (4/467)	0.27% (30/11223)	0.045	0.283	1
│└ abnormal preimplantation embryo morphology	MP:0014137	3.21% (15/467)	2.0% (224/11223)	0.056	0.319	1
│ └ abnormal blastocyst morphology	MP:0004957	3.21% (15/467)	2.0% (224/11223)	0.056	0.312	1
│ └ abnormal inner cell mass morphology	MP:0002718	2.14% (10/467)	0.86% (96/11223)	0.01	0.146	1
│ └ inner cell mass degeneration	MP:0004965	0.86% (4/467)	0.27% (30/11223)	0.045	0.329	1
├ abnormal extraembryonic tissue morphology	MP:0002086	9.21% (43/467)	5.68% (637/11223)	0.002	0.023	0.14
│├ abnormal allantois morphology	MP:0001726	2.36% (11/467)	0.73% (82/11223)	0.001	0.02	0.314
││└ absent allantois	MP:0003087	1.07% (5/467)	0.13% (15/11223)	0.000938	0.025	0.559986
│├ abnormal amnion morphology	MP:0005029	1.5% (7/467)	0.34% (38/11223)	0.002	0.033	0.628
││├ absent amnion	MP:0005030	1.07% (5/467)	0.13% (15/11223)	0.000938	0.025	0.559986
││└ absent amniotic folds	MP:0001710	0.64% (3/467)	0.05% (6/11223)	0.004	0.07	1
│└ abnormal placenta morphology	MP:0001711	3.64% (17/467)	2.91% (327/11223)	0.215	0.685	1
│ ├ abnormal placenta labyrinth morphology	MP:0001716	2.14% (10/467)	1.39% (156/11223)	0.128	0.443	1
│ │└ abnormal placenta labyrinth size	MP:0011519	1.07% (5/467)	0.39% (44/11223)	0.045	0.271	1
│ │ └ decreased placental labyrinth size	MP:0011521	1.07% (5/467)	0.36% (40/11223)	0.033	0.306	1
│ ├ abnormal trophoblast layer morphology	MP:0005031	1.93% (9/467)	1.33% (149/11223)	0.181	0.52	1
│ │└ abnormal spongiotrophoblast layer morphology	MP:0004255	0.86% (4/467)	0.5% (56/11223)	0.218	0.531	1
│ │ ├ abnormal trophoblast glycogen cell morphology	MP:0008958	0.43% (2/467)	0.05% (6/11223)	0.038	0.316	1
│ │ │└ decreased trophoblast glycogen cell number	MP:0012109	0.43% (2/467)	0.02% (2/11223)	0.009	0.131	1
│ │ └ abnormal spongiotrophoblast size	MP:0012097	0.64% (3/467)	0.2% (22/11223)	0.076	0.413	1
│ │ └ decreased spongiotrophoblast size	MP:0012099	0.64% (3/467)	0.12% (14/11223)	0.028	0.222	1
│ └ abnormal placenta junctional zone morphology	MP:0008957	0.86% (4/467)	0.55% (62/11223)	0.27	0.615	1
│ └ abnormal spongiotrophoblast layer morphology	MP:0004255	0.86% (4/467)	0.5% (56/11223)	0.218	0.531	1
│ ├ abnormal trophoblast glycogen cell morphology	MP:0008958	0.43% (2/467)	0.05% (6/11223)	0.038	0.316	1
│ │└ decreased trophoblast glycogen cell number	MP:0012109	0.43% (2/467)	0.02% (2/11223)	0.009	0.131	1
│ └ abnormal spongiotrophoblast size	MP:0012097	0.64% (3/467)	0.2% (22/11223)	0.076	0.413	1
│ └ decreased spongiotrophoblast size	MP:0012099	0.64% (3/467)	0.12% (14/11223)	0.028	0.222	1
├ abnormal embryonic tissue physiology	MP:0008932	4.71% (22/467)	2.41% (271/11223)	0.003	0.03	0.21
│├ abnormal primitive streak elongation	MP:0012685	0.64% (3/467)	0.07% (8/11223)	0.008	0.09	1
│├ abnormal inner cell mass proliferation	MP:0004966	1.28% (6/467)	0.59% (66/11223)	0.067	0.344	1
││└ decreased inner cell mass proliferation	MP:0012113	1.28% (6/467)	0.55% (62/11223)	0.054	0.31	1
││ └ absent inner cell mass proliferation	MP:0012114	1.07% (5/467)	0.34% (38/11223)	0.028	0.236	1
│└ abnormal embryonic tissue cell apoptosis	MP:0013503	2.36% (11/467)	1.59% (178/11223)	0.136	0.541	1
│ └ increased embryonic tissue cell apoptosis	MP:0013504	1.93% (9/467)	1.38% (155/11223)	0.21	0.545	1
│ └ increased ectoderm apoptosis	MP:0003895	0.43% (2/467)	0.04% (5/11223)	0.029	0.236	1
└ abnormal extraembryonic tissue physiology	MP:0004264	4.28% (20/467)	2.74% (308/11223)	0.04	0.233	1
├ abnormal placenta physiology	MP:0010038	2.57% (12/467)	1.33% (149/11223)	0.028	0.214	1
│└ abnormal placenta development	MP:0001712	2.36% (11/467)	1.14% (128/11223)	0.023	0.208	1
│ └ abnormal chorioallantoic fusion	MP:0002824	1.71% (8/467)	0.67% (75/11223)	0.018	0.215	1
│ └ failure of chorioallantoic fusion	MP:0009657	1.28% (6/467)	0.49% (55/11223)	0.034	0.306	1
└ abnormal trophectoderm cell proliferation	MP:0012115	0.43% (2/467)	0.05% (6/11223)	0.038	0.265	1
└ absent trophectoderm cell proliferation	MP:0012118	0.43% (2/467)	0.02% (2/11223)	0.009	0.131	1
■ growth/size/body region phenotype	MP:0005378	44.54% (208/467)	33.77% (3790/11223)	1.478e-06	1.379e-05	4.1384e-05
├ abnormal prenatal growth/weight/body size	MP:0004196	16.27% (76/467)	9.19% (1031/11223)	1.531e-06	5.359e-05	0.00010717
│├ abnormal embryonic growth/weight/body size	MP:0002088	13.7% (64/467)	7.65% (858/11223)	8.16e-06	0.0006406	0.00256224
││├ abnormal embryo size	MP:0001697	9.85% (46/467)	5.77% (648/11223)	0.0004737	0.017	0.282799
│││└ decreased embryo size	MP:0001698	7.92% (37/467)	4.76% (534/11223)	0.002	0.055	1
││└ embryonic growth retardation	MP:0003984	7.71% (36/467)	4.6% (516/11223)	0.003	0.056	1
│├ abnormal prenatal body size	MP:0010866	11.99% (56/467)	6.93% (778/11223)	7.949e-05	0.002	0.0249599
││└ abnormal embryo size	MP:0001697	9.85% (46/467)	5.77% (648/11223)	0.0004737	0.017	0.282799
││ └ decreased embryo size	MP:0001698	7.92% (37/467)	4.76% (534/11223)	0.002	0.055	1
│└ prenatal growth retardation	MP:0010865	8.57% (40/467)	5.36% (602/11223)	0.003	0.041	0.942
│ └ embryonic growth retardation	MP:0003984	7.71% (36/467)	4.6% (516/11223)	0.003	0.056	1
├ abnormal postnatal growth/weight/body size	MP:0002089	29.12% (136/467)	23.8% (2671/11223)	0.006	0.047	0.42
│├ abnormal postnatal growth	MP:0001731	11.99% (56/467)	6.77% (760/11223)	4.378e-05	0.002	0.0137469
││└ postnatal growth retardation	MP:0001732	11.56% (54/467)	6.61% (742/11223)	8.227e-05	0.004	0.0491152
││ └ slow postnatal weight gain	MP:0008489	2.36% (11/467)	1.27% (142/11223)	0.043	0.27	1
│└ abnormal body size	MP:0003956	25.27% (118/467)	20.51% (2302/11223)	0.009	0.097	1
│ ├ decreased body size	MP:0001265	23.98% (112/467)	17.62% (1977/11223)	0.0004145	0.017	0.247456
│ │└ decreased body weight	MP:0001262	17.77% (83/467)	13.14% (1475/11223)	0.003	0.069	1
│ │ └ slow postnatal weight gain	MP:0008489	2.36% (11/467)	1.27% (142/11223)	0.043	0.329	1
│ └ abnormal body weight	MP:0001259	18.63% (87/467)	15.94% (1789/11223)	0.07	0.348	1
│ └ decreased body weight	MP:0001262	17.77% (83/467)	13.14% (1475/11223)	0.003	0.069	1
│ └ slow postnatal weight gain	MP:0008489	2.36% (11/467)	1.27% (142/11223)	0.043	0.329	1
├ abnormal body composition	MP:0005451	20.99% (98/467)	17.46% (1960/11223)	0.031	0.197	1
│└ abnormal total tissue mass	MP:0012321	18.63% (87/467)	14.79% (1660/11223)	0.015	0.143	1
│ └ decreased total tissue mass	MP:0012322	17.77% (83/467)	13.14% (1475/11223)	0.003	0.056	1
│ └ decreased body weight	MP:0001262	17.77% (83/467)	13.14% (1475/11223)	0.003	0.069	1
│ └ slow postnatal weight gain	MP:0008489	2.36% (11/467)	1.27% (142/11223)	0.043	0.329	1
└ abnormal head morphology	MP:0000432	7.92% (37/467)	7.36% (826/11223)	0.35	0.882	1
├ acephaly	MP:0009579	0.43% (2/467)	0.03% (3/11223)	0.015	0.143	1
├ abnormal head development	MP:0012176	1.07% (5/467)	0.38% (43/11223)	0.042	0.269	1
│├ abnormal anterior head development	MP:0030324	0.43% (2/467)	0.04% (5/11223)	0.029	0.231	1
│└ abnormal face development	MP:0030313	0.21% (1/467)	0.01% (1/11223)	0.078	1	1
│ └ facial asymmetry	MP:0030099	0.21% (1/467)	0.0% (0/11223)	0.04	1	1
│ └ hemifacial hypoplasia	MP:0030100	0.21% (1/467)	0.0% (0/11223)	0.04	1	1
├ abnormal outer ear morphology	MP:0002177	1.71% (8/467)	0.86% (97/11223)	0.059	0.319	1
│└ abnormal ear position	MP:0000023	0.86% (4/467)	0.21% (24/11223)	0.024	0.214	1
└ abnormal facial morphology	MP:0003743	5.78% (27/467)	5.89% (661/11223)	0.568	0.967	1
├ abnormal face development	MP:0030313	0.21% (1/467)	0.01% (1/11223)	0.078	1	1
│└ facial asymmetry	MP:0030099	0.21% (1/467)	0.0% (0/11223)	0.04	1	1
│ └ hemifacial hypoplasia	MP:0030100	0.21% (1/467)	0.0% (0/11223)	0.04	1	1
├ abnormal face shape	MP:0030071	0.43% (2/467)	0.18% (20/11223)	0.219	0.545	1
│└ facial asymmetry	MP:0030099	0.21% (1/467)	0.0% (0/11223)	0.04	1	1
│ └ hemifacial hypoplasia	MP:0030100	0.21% (1/467)	0.0% (0/11223)	0.04	1	1
├ abnormal mouth morphology	MP:0000452	4.71% (22/467)	4.22% (474/11223)	0.336	0.708	1
│├ abnormal palate morphology	MP:0003755	2.57% (12/467)	2.21% (248/11223)	0.346	0.658	1
││├ abnormal palate development	MP:0009653	1.5% (7/467)	0.87% (98/11223)	0.127	0.484	1
│││└ abnormal secondary palate development	MP:0009655	1.28% (6/467)	0.85% (95/11223)	0.216	0.558	1
│││ └ abnormal palatal shelf fusion at midline	MP:0009887	1.28% (6/467)	0.53% (60/11223)	0.048	0.305	1
││├ cleft palate	MP:0000111	2.57% (12/467)	1.93% (217/11223)	0.206	0.578	1
│││└ cleft secondary palate	MP:0009890	1.71% (8/467)	1.04% (117/11223)	0.127	0.447	1
│││ └ cleft hard palate	MP:0013545	1.28% (6/467)	0.69% (77/11223)	0.114	0.422	1
│││ └ abnormal palatal shelf fusion at midline	MP:0009887	1.28% (6/467)	0.53% (60/11223)	0.048	0.245	1
││└ abnormal secondary palate morphology	MP:0013550	1.71% (8/467)	1.25% (140/11223)	0.24	0.611	1
││ ├ cleft secondary palate	MP:0009890	1.71% (8/467)	1.04% (117/11223)	0.127	0.447	1
││ │└ cleft hard palate	MP:0013545	1.28% (6/467)	0.69% (77/11223)	0.114	0.422	1
││ │ └ abnormal palatal shelf fusion at midline	MP:0009887	1.28% (6/467)	0.53% (60/11223)	0.048	0.245	1
││ └ abnormal hard palate morphology	MP:0003756	1.5% (7/467)	0.93% (104/11223)	0.156	0.486	1
││ └ cleft hard palate	MP:0013545	1.28% (6/467)	0.69% (77/11223)	0.114	0.422	1
││ └ abnormal palatal shelf fusion at midline	MP:0009887	1.28% (6/467)	0.53% (60/11223)	0.048	0.245	1
│└ abnormal tongue morphology	MP:0000762	0.43% (2/467)	0.85% (95/11223)	0.904	1	1
│ └ abnormal tongue muscle morphology	MP:0004136	0.21% (1/467)	0.11% (12/11223)	0.412	1	1
│ └ tongue muscle hypoplasia	MP:0030421	0.21% (1/467)	0.0% (0/11223)	0.04	1	1
├ abnormal face size	MP:0030063	0.43% (2/467)	0.25% (28/11223)	0.338	0.708	1
│└ small face	MP:0030064	0.43% (2/467)	0.23% (26/11223)	0.309	0.621	1
│ └ face hypoplasia	MP:0030065	0.21% (1/467)	0.07% (8/11223)	0.307	1	1
│ └ hemifacial hypoplasia	MP:0030100	0.21% (1/467)	0.0% (0/11223)	0.04	1	1
└ abnormal midface morphology	MP:0030095	0.21% (1/467)	0.14% (16/11223)	0.5	1	1
├ abnormal periauricular region morphology	MP:0030096	0.21% (1/467)	0.0% (0/11223)	0.04	1	1
│└ preauricular pit	MP:0030097	0.21% (1/467)	0.0% (0/11223)	0.04	1	1
└ abnormal cheek morphology	MP:0030246	0.21% (1/467)	0.02% (2/11223)	0.115	1	1
└ abnormal periauricular region morphology	MP:0030096	0.21% (1/467)	0.0% (0/11223)	0.04	1	1
└ preauricular pit	MP:0030097	0.21% (1/467)	0.0% (0/11223)	0.04	1	1
■ nervous system phenotype	MP:0003631	34.05% (159/467)	28.17% (3162/11223)	0.004	0.028	0.112
├ abnormal nervous system morphology	MP:0003632	28.69% (134/467)	21.51% (2414/11223)	0.0002129	0.003	0.014903
│├ abnormal brain morphology	MP:0002152	19.7% (92/467)	12.86% (1443/11223)	3.144e-05	0.002	0.00987216
││├ abnormal hindbrain morphology	MP:0000841	7.71% (36/467)	3.37% (378/11223)	9.265e-06	0.0006914	0.0055312
│││├ abnormal metencephalon morphology	MP:0000847	6.64% (31/467)	2.88% (323/11223)	3.414e-05	0.002	0.0244784
││││├ abnormal cerebellum morphology	MP:0000849	5.57% (26/467)	2.65% (297/11223)	0.0005448	0.034	0.343769
│││││├ small cerebellum	MP:0000852	2.57% (12/467)	0.76% (85/11223)	0.0004675	0.024	0.20383
││││││└ cerebellum hypoplasia	MP:0000851	0.64% (3/467)	0.13% (15/11223)	0.033	0.257	1
│││││├ abnormal cerebellar cortex morphology	MP:0004097	4.71% (22/467)	2.05% (230/11223)	0.0004864	0.024	0.21207
││││││├ abnormal cerebellar layer morphology	MP:0009956	4.07% (19/467)	1.77% (199/11223)	0.001	0.028	0.28
│││││││├ abnormal cerebellar molecular layer	MP:0000889	1.93% (9/467)	0.36% (40/11223)	0.0001185	0.003	0.0235815
│││││││├ abnormal cerebellar granule layer morphology	MP:0000886	1.93% (9/467)	0.66% (74/11223)	0.006	0.08	1
││││││││└ abnormal cerebellar granule cell morphology	MP:0004098	1.07% (5/467)	0.35% (39/11223)	0.03	0.212	1
│││││││└ abnormal cerebellar Purkinje cell layer	MP:0000875	3.0% (14/467)	1.41% (158/11223)	0.009	0.09	1
│││││││ └ abnormal Purkinje cell morphology	MP:0000877	2.78% (13/467)	1.27% (143/11223)	0.01	0.12	1
│││││││ ├ ectopic Purkinje cell	MP:0000885	1.28% (6/467)	0.18% (20/11223)	0.000458	0.005	0.021984
│││││││ └ abnormal Purkinje cell number	MP:0000878	1.07% (5/467)	0.41% (46/11223)	0.052	0.253	1
│││││││ └ decreased Purkinje cell number	MP:0000880	1.07% (5/467)	0.39% (44/11223)	0.045	0.203	0.81
││││││├ abnormal cerebellum lobule morphology	MP:0009964	1.93% (9/467)	0.53% (59/11223)	0.001	0.028	0.28
│││││││├ abnormal cerebellar foliation	MP:0000857	1.71% (8/467)	0.45% (51/11223)	0.002	0.036	0.398
││││││││├ abnormal cerebellar lobule formation	MP:0006097	1.07% (5/467)	0.04% (5/11223)	2.125e-05	0.00051	0.00255
││││││││└ reduced cerebellar foliation	MP:0009719	0.86% (4/467)	0.15% (17/11223)	0.009	0.12	1
│││││││├ absent cerebellar lobules	MP:0006098	0.43% (2/467)	0.02% (2/11223)	0.009	0.09	1
│││││││└ abnormal cerebellum vermis lobule morphology	MP:0009957	0.21% (1/467)	0.04% (5/11223)	0.217	1	1
│││││││ └ abnormal cerebellum vermis lobule I morphology	MP:0009988	0.21% (1/467)	0.0% (0/11223)	0.04	1	1
││││││├ abnormal cerebellum vermis morphology	MP:0000864	1.28% (6/467)	0.26% (29/11223)	0.002	0.047	0.56
│││││││├ abnormal cerebellum anterior vermis morphology	MP:0000867	0.64% (3/467)	0.04% (5/11223)	0.003	0.05	0.597
││││││││└ abnormal cerebellum vermis lobule I morphology	MP:0009988	0.21% (1/467)	0.0% (0/11223)	0.04	1	1
│││││││└ abnormal cerebellum vermis lobule morphology	MP:0009957	0.21% (1/467)	0.04% (5/11223)	0.217	1	1
│││││││ └ abnormal cerebellum vermis lobule I morphology	MP:0009988	0.21% (1/467)	0.0% (0/11223)	0.04	1	1
││││││├ abnormal cerebellum anterior lobe morphology	MP:0009960	0.64% (3/467)	0.05% (6/11223)	0.004	0.086	1
│││││││└ abnormal cerebellum anterior vermis morphology	MP:0000867	0.64% (3/467)	0.04% (5/11223)	0.003	0.05	0.597
│││││││ └ abnormal cerebellum vermis lobule I morphology	MP:0009988	0.21% (1/467)	0.0% (0/11223)	0.04	1	1
││││││└ abnormal cerebellum fissure morphology	MP:0009267	0.43% (2/467)	0.04% (5/11223)	0.029	0.24	1
│││││└ abnormal cerebellum development	MP:0000854	2.14% (10/467)	0.72% (81/11223)	0.003	0.073	1
│││││ ├ abnormal cerebellar foliation	MP:0000857	1.71% (8/467)	0.45% (51/11223)	0.002	0.047	0.56
│││││ │├ abnormal cerebellar lobule formation	MP:0006097	1.07% (5/467)	0.04% (5/11223)	2.125e-05	0.0006041	0.00422875
│││││ │└ reduced cerebellar foliation	MP:0009719	0.86% (4/467)	0.15% (17/11223)	0.009	0.09	1
│││││ └ abnormal cerebellum external granule cell layer morphology	MP:0000872	1.07% (5/467)	0.35% (39/11223)	0.03	0.24	1
││││└ abnormal pons morphology	MP:0000848	1.07% (5/467)	0.34% (38/11223)	0.028	0.296	1
││││ ├ abnormal pontine nuclei morphology	MP:0020560	0.43% (2/467)	0.02% (2/11223)	0.009	0.131	1
││││ └ abnormal locus ceruleus morphology	MP:0003661	0.43% (2/467)	0.04% (5/11223)	0.029	0.222	1
│││├ abnormal medulla oblongata morphology	MP:0000846	0.86% (4/467)	0.17% (19/11223)	0.012	0.166	1
││││└ abnormal medulla oblongata anterior median fissure morphology	MP:0009680	0.43% (2/467)	0.02% (2/11223)	0.009	0.177	1
││││ └ abnormal pyramidal decussation morphology	MP:0009681	0.43% (2/467)	0.02% (2/11223)	0.009	0.131	1
│││└ abnormal fourth ventricle morphology	MP:0000828	0.86% (4/467)	0.2% (22/11223)	0.019	0.223	1
││├ abnormal forebrain morphology	MP:0000783	12.63% (59/467)	7.94% (891/11223)	0.000415	0.017	0.247755
│││├ abnormal limbic system morphology	MP:0004166	6.42% (30/467)	2.51% (282/11223)	7.55e-06	0.0006015	0.00541335
││││└ abnormal hippocampus morphology	MP:0000807	5.78% (27/467)	2.18% (245/11223)	1.215e-05	0.001	0.00766665
││││ ├ abnormal hippocampus layer morphology	MP:0000813	3.0% (14/467)	0.54% (61/11223)	1.299e-06	0.0002745	0.000566364
││││ │├ abnormal hippocampus pyramidal cell layer	MP:0008284	2.57% (12/467)	0.45% (50/11223)	5.023e-06	0.0004688	0.00140644
││││ ││└ abnormal hippocampus pyramidal cell morphology	MP:0009940	2.36% (11/467)	0.33% (37/11223)	2.175e-06	0.0001443	0.000432825
││││ ││ ├ ectopic hippocampus pyramidal cells	MP:0010011	1.07% (5/467)	0.02% (2/11223)	1.957e-06	0.0001305	0.00023484
││││ ││ ├ decreased hippocampus pyramidal cell number	MP:0009971	0.86% (4/467)	0.04% (4/11223)	0.0001548	0.003	0.018576
││││ ││ └ hippocampus pyramidal cell degeneration	MP:0010014	0.43% (2/467)	0.02% (2/11223)	0.009	0.12	1
││││ │└ abnormal hippocampus stratum lacunosum morphology	MP:0011149	0.21% (1/467)	0.0% (0/11223)	0.04	1	1
││││ ├ abnormal hippocampus neuron morphology	MP:0009939	2.78% (13/467)	0.61% (69/11223)	2.004e-05	0.001	0.00873744
││││ │└ abnormal hippocampus pyramidal cell morphology	MP:0009940	2.36% (11/467)	0.33% (37/11223)	2.175e-06	0.0004688	0.000609
││││ │ ├ ectopic hippocampus pyramidal cells	MP:0010011	1.07% (5/467)	0.02% (2/11223)	1.957e-06	0.0001443	0.000389443
││││ │ ├ decreased hippocampus pyramidal cell number	MP:0009971	0.86% (4/467)	0.04% (4/11223)	0.0001548	0.003	0.0308052
││││ │ └ hippocampus pyramidal cell degeneration	MP:0010014	0.43% (2/467)	0.02% (2/11223)	0.009	0.09	1
││││ ├ abnormal hippocampal mossy fiber morphology	MP:0002761	0.86% (4/467)	0.2% (23/11223)	0.021	0.208	1
││││ └ abnormal hippocampus size	MP:0008281	1.07% (5/467)	0.43% (48/11223)	0.06	0.323	1
││││ └ small hippocampus	MP:0008283	0.86% (4/467)	0.35% (39/11223)	0.091	0.389	1
││││ └ decreased hippocampus volume	MP:0020083	0.43% (2/467)	0.03% (3/11223)	0.015	0.136	1
│││├ abnormal telencephalon morphology	MP:0000787	9.64% (45/467)	6.16% (691/11223)	0.003	0.069	1
││││├ abnormal hippocampus morphology	MP:0000807	5.78% (27/467)	2.18% (245/11223)	1.215e-05	0.001	0.00766665
│││││├ abnormal hippocampus layer morphology	MP:0000813	3.0% (14/467)	0.54% (61/11223)	1.299e-06	0.0002745	0.000566364
││││││├ abnormal hippocampus pyramidal cell layer	MP:0008284	2.57% (12/467)	0.45% (50/11223)	5.023e-06	0.0004688	0.00140644
│││││││└ abnormal hippocampus pyramidal cell morphology	MP:0009940	2.36% (11/467)	0.33% (37/11223)	2.175e-06	0.0001443	0.000432825
│││││││ ├ ectopic hippocampus pyramidal cells	MP:0010011	1.07% (5/467)	0.02% (2/11223)	1.957e-06	0.0001305	0.00023484
│││││││ ├ decreased hippocampus pyramidal cell number	MP:0009971	0.86% (4/467)	0.04% (4/11223)	0.0001548	0.003	0.018576
│││││││ └ hippocampus pyramidal cell degeneration	MP:0010014	0.43% (2/467)	0.02% (2/11223)	0.009	0.12	1
││││││└ abnormal hippocampus stratum lacunosum morphology	MP:0011149	0.21% (1/467)	0.0% (0/11223)	0.04	1	1
│││││├ abnormal hippocampus neuron morphology	MP:0009939	2.78% (13/467)	0.61% (69/11223)	2.004e-05	0.001	0.00873744
││││││└ abnormal hippocampus pyramidal cell morphology	MP:0009940	2.36% (11/467)	0.33% (37/11223)	2.175e-06	0.0004688	0.000609
││││││ ├ ectopic hippocampus pyramidal cells	MP:0010011	1.07% (5/467)	0.02% (2/11223)	1.957e-06	0.0001443	0.000389443
││││││ ├ decreased hippocampus pyramidal cell number	MP:0009971	0.86% (4/467)	0.04% (4/11223)	0.0001548	0.003	0.0308052
││││││ └ hippocampus pyramidal cell degeneration	MP:0010014	0.43% (2/467)	0.02% (2/11223)	0.009	0.09	1
│││││├ abnormal hippocampal mossy fiber morphology	MP:0002761	0.86% (4/467)	0.2% (23/11223)	0.021	0.208	1
│││││└ abnormal hippocampus size	MP:0008281	1.07% (5/467)	0.43% (48/11223)	0.06	0.323	1
│││││ └ small hippocampus	MP:0008283	0.86% (4/467)	0.35% (39/11223)	0.091	0.389	1
│││││ └ decreased hippocampus volume	MP:0020083	0.43% (2/467)	0.03% (3/11223)	0.015	0.136	1
││││├ abnormal cerebral hemisphere morphology	MP:0008540	8.35% (39/467)	4.48% (503/11223)	0.0002609	0.018	0.164628
│││││├ abnormal temporal lobe morphology	MP:0000801	5.78% (27/467)	2.25% (252/11223)	1.925e-05	0.001	0.008393
││││││└ abnormal hippocampus morphology	MP:0000807	5.78% (27/467)	2.18% (245/11223)	1.215e-05	0.0006804	0.003402
││││││ ├ abnormal hippocampus layer morphology	MP:0000813	3.0% (14/467)	0.54% (61/11223)	1.299e-06	0.0001443	0.000258501
││││││ │├ abnormal hippocampus pyramidal cell layer	MP:0008284	2.57% (12/467)	0.45% (50/11223)	5.023e-06	0.0001604	0.00060276
││││││ ││└ abnormal hippocampus pyramidal cell morphology	MP:0009940	2.36% (11/467)	0.33% (37/11223)	2.175e-06	5.22e-05	0.0001044
││││││ ││ ├ ectopic hippocampus pyramidal cells	MP:0010011	1.07% (5/467)	0.02% (2/11223)	1.957e-06	3.523e-05	3.5226e-05
││││││ ││ ├ decreased hippocampus pyramidal cell number	MP:0009971	0.86% (4/467)	0.04% (4/11223)	0.0001548	0.001	0.0027864
││││││ ││ └ hippocampus pyramidal cell degeneration	MP:0010014	0.43% (2/467)	0.02% (2/11223)	0.009	0.054	0.162
││││││ │└ abnormal hippocampus stratum lacunosum morphology	MP:0011149	0.21% (1/467)	0.0% (0/11223)	0.04	1	1
││││││ ├ abnormal hippocampus neuron morphology	MP:0009939	2.78% (13/467)	0.61% (69/11223)	2.004e-05	0.0006041	0.00398796
││││││ │└ abnormal hippocampus pyramidal cell morphology	MP:0009940	2.36% (11/467)	0.33% (37/11223)	2.175e-06	0.0001305	0.000261
││││││ │ ├ ectopic hippocampus pyramidal cells	MP:0010011	1.07% (5/467)	0.02% (2/11223)	1.957e-06	5.22e-05	9.3936e-05
││││││ │ ├ decreased hippocampus pyramidal cell number	MP:0009971	0.86% (4/467)	0.04% (4/11223)	0.0001548	0.002	0.0074304
││││││ │ └ hippocampus pyramidal cell degeneration	MP:0010014	0.43% (2/467)	0.02% (2/11223)	0.009	0.072	0.432
││││││ ├ abnormal hippocampal mossy fiber morphology	MP:0002761	0.86% (4/467)	0.2% (23/11223)	0.021	0.144	1
││││││ └ abnormal hippocampus size	MP:0008281	1.07% (5/467)	0.43% (48/11223)	0.06	0.254	1
││││││ └ small hippocampus	MP:0008283	0.86% (4/467)	0.35% (39/11223)	0.091	0.364	1
││││││ └ decreased hippocampus volume	MP:0020083	0.43% (2/467)	0.03% (3/11223)	0.015	0.103	0.72
│││││├ abnormal corpus callosum morphology	MP:0000780	2.36% (11/467)	0.78% (87/11223)	0.002	0.058	0.872
││││││├ abnormal corpus callosum size	MP:0020573	1.28% (6/467)	0.22% (25/11223)	0.001	0.028	0.28
│││││││└ decreased corpus callosum size	MP:0000781	1.28% (6/467)	0.21% (24/11223)	0.001	0.02	0.199
││││││└ absent corpus callosum	MP:0002196	0.86% (4/467)	0.26% (29/11223)	0.041	0.267	1
│││││└ abnormal cerebral cortex morphology	MP:0000788	3.64% (17/467)	2.69% (302/11223)	0.139	0.462	1
│││││ └ abnormal stratification in cerebral cortex	MP:0000790	1.07% (5/467)	0.25% (28/11223)	0.009	0.11	1
││││├ absent telencephalon	MP:0012683	0.21% (1/467)	0.0% (0/11223)	0.04	1	1
││││└ abnormal striatum morphology	MP:0004077	1.07% (5/467)	0.44% (49/11223)	0.064	0.377	1
││││ └ decreased striatum area	MP:0012468	0.86% (4/467)	0.14% (16/11223)	0.007	0.131	1
│││├ abnormal basal ganglion morphology	MP:0006007	1.71% (8/467)	0.63% (71/11223)	0.013	0.166	1
││││└ abnormal striatum morphology	MP:0004077	1.07% (5/467)	0.44% (49/11223)	0.064	0.377	1
││││ └ decreased striatum area	MP:0012468	0.86% (4/467)	0.14% (16/11223)	0.007	0.131	1
│││└ abnormal diencephalon morphology	MP:0000830	3.64% (17/467)	2.41% (271/11223)	0.07	0.33	1
│││ ├ abnormal mammillary body morphology	MP:0004162	0.21% (1/467)	0.0% (0/11223)	0.04	1	1
│││ ├ abnormal thalamus morphology	MP:0000832	0.64% (3/467)	0.37% (42/11223)	0.267	0.631	1
│││ │└ disorganized thalamus	MP:0020530	0.21% (1/467)	0.0% (0/11223)	0.04	1	1
│││ └ abnormal pituitary gland morphology	MP:0000633	1.28% (6/467)	1.1% (124/11223)	0.419	0.782	1
│││ ├ abnormal pituitary gland size	MP:0008936	0.64% (3/467)	0.34% (38/11223)	0.224	0.56	1
│││ │└ enlarged pituitary gland	MP:0000636	0.64% (3/467)	0.07% (8/11223)	0.008	0.11	1
│││ └ abnormal adenohypophysis morphology	MP:0004163	1.07% (5/467)	0.86% (96/11223)	0.378	0.746	1
│││ └ abnormal thyrotroph morphology	MP:0008326	0.64% (3/467)	0.11% (12/11223)	0.02	0.19	1
│││ └ increased thyrotroph cell number	MP:0008337	0.43% (2/467)	0.04% (4/11223)	0.021	0.144	1
││├ abnormal brainstem morphology	MP:0005277	3.85% (18/467)	1.68% (189/11223)	0.002	0.044	1
│││├ abnormal midbrain morphology	MP:0000897	2.57% (12/467)	1.09% (122/11223)	0.007	0.119	1
││││└ abnormal midbrain roof plate morphology	MP:0006103	0.86% (4/467)	0.23% (26/11223)	0.03	0.296	1
││││ └ abnormal tectum morphology	MP:0006104	0.86% (4/467)	0.23% (26/11223)	0.03	0.222	1
││││ ├ abnormal corpora quadrigemina morphology	MP:0000899	0.86% (4/467)	0.23% (26/11223)	0.03	0.24	1
││││ │└ abnormal inferior colliculus morphology	MP:0000776	0.64% (3/467)	0.14% (16/11223)	0.038	0.204	1
││││ └ small tectum	MP:0006105	0.21% (1/467)	0.0% (0/11223)	0.04	1	1
│││├ abnormal medulla oblongata morphology	MP:0000846	0.86% (4/467)	0.17% (19/11223)	0.012	0.166	1
││││└ abnormal medulla oblongata anterior median fissure morphology	MP:0009680	0.43% (2/467)	0.02% (2/11223)	0.009	0.177	1
││││ └ abnormal pyramidal decussation morphology	MP:0009681	0.43% (2/467)	0.02% (2/11223)	0.009	0.131	1
│││└ abnormal pons morphology	MP:0000848	1.07% (5/467)	0.34% (38/11223)	0.028	0.236	1
│││ ├ abnormal pontine nuclei morphology	MP:0020560	0.43% (2/467)	0.02% (2/11223)	0.009	0.177	1
│││ └ abnormal locus ceruleus morphology	MP:0003661	0.43% (2/467)	0.04% (5/11223)	0.029	0.296	1
││├ abnormal brain white matter morphology	MP:0008026	3.43% (16/467)	1.47% (165/11223)	0.002	0.044	1
│││└ abnormal brain commissure morphology	MP:0002199	2.78% (13/467)	1.02% (115/11223)	0.002	0.055	1
│││ └ abnormal dorsal telencephalic commissure morphology	MP:0008219	2.36% (11/467)	0.8% (90/11223)	0.002	0.066	1
│││ └ abnormal corpus callosum morphology	MP:0000780	2.36% (11/467)	0.78% (87/11223)	0.002	0.058	0.872
│││ ├ abnormal corpus callosum size	MP:0020573	1.28% (6/467)	0.22% (25/11223)	0.001	0.028	0.28
│││ │└ decreased corpus callosum size	MP:0000781	1.28% (6/467)	0.21% (24/11223)	0.001	0.02	0.199
│││ └ absent corpus callosum	MP:0002196	0.86% (4/467)	0.26% (29/11223)	0.041	0.267	1
││├ abnormal midbrain morphology	MP:0000897	2.57% (12/467)	1.09% (122/11223)	0.007	0.113	1
│││└ abnormal midbrain roof plate morphology	MP:0006103	0.86% (4/467)	0.23% (26/11223)	0.03	0.236	1
│││ └ abnormal tectum morphology	MP:0006104	0.86% (4/467)	0.23% (26/11223)	0.03	0.296	1
│││ ├ abnormal corpora quadrigemina morphology	MP:0000899	0.86% (4/467)	0.23% (26/11223)	0.03	0.222	1
│││ │└ abnormal inferior colliculus morphology	MP:0000776	0.64% (3/467)	0.14% (16/11223)	0.038	0.26	1
│││ └ small tectum	MP:0006105	0.21% (1/467)	0.0% (0/11223)	0.04	1	1
││├ abnormal brain development	MP:0000913	7.92% (37/467)	5.48% (615/11223)	0.019	0.199	1
│││├ abnormal hindbrain development	MP:0006108	3.0% (14/467)	1.09% (122/11223)	0.001	0.036	0.717
││││└ abnormal cerebellum development	MP:0000854	2.14% (10/467)	0.72% (81/11223)	0.003	0.086	1
││││ ├ abnormal cerebellar foliation	MP:0000857	1.71% (8/467)	0.45% (51/11223)	0.002	0.058	0.872
││││ │├ abnormal cerebellar lobule formation	MP:0006097	1.07% (5/467)	0.04% (5/11223)	2.125e-05	0.0009917	0.00595
││││ │└ reduced cerebellar foliation	MP:0009719	0.86% (4/467)	0.15% (17/11223)	0.009	0.11	1
││││ └ abnormal cerebellum external granule cell layer morphology	MP:0000872	1.07% (5/467)	0.35% (39/11223)	0.03	0.222	1
│││└ abnormal midbrain-hindbrain boundary morphology	MP:0012132	0.64% (3/467)	0.12% (13/11223)	0.024	0.236	1
│││ ├ absent midbrain-hindbrain boundary	MP:0012133	0.43% (2/467)	0.02% (2/11223)	0.009	0.177	1
│││ └ abnormal midbrain-hindbrain boundary development	MP:0004096	0.43% (2/467)	0.06% (7/11223)	0.048	0.329	1
││└ abnormal brain ventricular system morphology	MP:0002200	3.64% (17/467)	2.82% (316/11223)	0.18	0.519	1
││ └ abnormal brain ventricle morphology	MP:0000822	3.21% (15/467)	2.26% (254/11223)	0.121	0.415	1
││ └ abnormal fourth ventricle morphology	MP:0000828	0.86% (4/467)	0.2% (22/11223)	0.019	0.279	1
│├ abnormal neuron morphology	MP:0002882	16.06% (75/467)	10.67% (1198/11223)	0.0003297	0.009	0.103526
││├ ectopic neuron	MP:0011723	2.14% (10/467)	0.29% (33/11223)	5.499e-06	0.000469	0.0032829
│││├ ectopic hippocampus pyramidal cells	MP:0010011	1.07% (5/467)	0.02% (2/11223)	1.957e-06	0.0002599	0.00140317
│││└ ectopic Purkinje cell	MP:0000885	1.28% (6/467)	0.18% (20/11223)	0.000458	0.019	0.328386
││├ abnormal hippocampus neuron morphology	MP:0009939	2.78% (13/467)	0.61% (69/11223)	2.004e-05	0.001	0.0119639
│││└ abnormal hippocampus pyramidal cell morphology	MP:0009940	2.36% (11/467)	0.33% (37/11223)	2.175e-06	0.0002599	0.00155948
│││ ├ ectopic hippocampus pyramidal cells	MP:0010011	1.07% (5/467)	0.02% (2/11223)	1.957e-06	0.000247	0.00123487
│││ ├ decreased hippocampus pyramidal cell number	MP:0009971	0.86% (4/467)	0.04% (4/11223)	0.0001548	0.012	0.0976788
│││ └ hippocampus pyramidal cell degeneration	MP:0010014	0.43% (2/467)	0.02% (2/11223)	0.009	0.177	1
││├ abnormal neuron number	MP:0008946	5.57% (26/467)	2.98% (334/11223)	0.003	0.056	1
│││├ decreased neuron number	MP:0008948	4.71% (22/467)	2.42% (272/11223)	0.004	0.09	1
││││├ decreased hippocampus pyramidal cell number	MP:0009971	0.86% (4/467)	0.04% (4/11223)	0.0001548	0.012	0.0976788
││││├ decreased Purkinje cell number	MP:0000880	1.07% (5/467)	0.39% (44/11223)	0.045	0.329	1
││││├ decreased motor neuron number	MP:0000939	1.07% (5/467)	0.39% (44/11223)	0.045	0.329	1
││││└ decreased sensory neuron number	MP:0000966	1.5% (7/467)	1.28% (144/11223)	0.399	0.772	1
││││ └ decreased cochlear hair cell number	MP:0004408	0.86% (4/467)	0.41% (46/11223)	0.138	0.462	1
││││ └ decreased cochlear outer hair cell number	MP:0004402	0.86% (4/467)	0.28% (31/11223)	0.05	0.311	1
│││└ increased neuron number	MP:0008947	1.71% (8/467)	0.52% (58/11223)	0.005	0.097	1
││├ abnormal Purkinje cell morphology	MP:0000877	2.78% (13/467)	1.27% (143/11223)	0.01	0.139	1
│││├ ectopic Purkinje cell	MP:0000885	1.28% (6/467)	0.18% (20/11223)	0.000458	0.019	0.328386
│││└ abnormal Purkinje cell number	MP:0000878	1.07% (5/467)	0.41% (46/11223)	0.052	0.3	1
│││ └ decreased Purkinje cell number	MP:0000880	1.07% (5/467)	0.39% (44/11223)	0.045	0.329	1
││├ abnormal synapse morphology	MP:0009538	3.0% (14/467)	1.47% (165/11223)	0.013	0.158	1
│││└ abnormal synaptic vesicle morphology	MP:0004769	1.07% (5/467)	0.38% (43/11223)	0.042	0.266	1
││├ abnormal motor neuron morphology	MP:0000937	2.36% (11/467)	1.12% (126/11223)	0.021	0.199	1
│││└ decreased motor neuron number	MP:0000939	1.07% (5/467)	0.39% (44/11223)	0.045	0.271	1
││├ abnormal neurite morphology	MP:0008415	4.28% (20/467)	3.03% (340/11223)	0.085	0.39	1
│││└ abnormal dendrite morphology	MP:0008143	2.57% (12/467)	1.35% (152/11223)	0.032	0.244	1
││├ neuron degeneration	MP:0003224	2.78% (13/467)	2.53% (284/11223)	0.408	0.773	1
│││└ cochlear hair cell degeneration	MP:0004362	1.5% (7/467)	0.75% (84/11223)	0.071	0.333	1
│││ └ cochlear outer hair cell degeneration	MP:0004404	1.5% (7/467)	0.6% (67/11223)	0.028	0.296	1
││└ abnormal sensory neuron morphology	MP:0000965	3.64% (17/467)	3.45% (387/11223)	0.448	0.784	1
││ └ decreased sensory neuron number	MP:0000966	1.5% (7/467)	1.28% (144/11223)	0.399	0.708	1
││ └ decreased cochlear hair cell number	MP:0004408	0.86% (4/467)	0.41% (46/11223)	0.138	0.486	1
││ └ decreased cochlear outer hair cell number	MP:0004402	0.86% (4/467)	0.28% (31/11223)	0.05	0.287	1
│├ abnormal spinal cord morphology	MP:0000955	4.71% (22/467)	2.02% (227/11223)	0.0004127	0.01	0.129588
││├ abnormal spinal cord grey matter morphology	MP:0008503	2.57% (12/467)	1.35% (152/11223)	0.032	0.242	1
│││└ abnormal motor neuron morphology	MP:0000937	2.36% (11/467)	1.12% (126/11223)	0.021	0.228	1
│││ └ decreased motor neuron number	MP:0000939	1.07% (5/467)	0.39% (44/11223)	0.045	0.329	1
││├ abnormal spinal cord central canal morphology	MP:0009688	0.43% (2/467)	0.05% (6/11223)	0.038	0.255	1
││└ syringomyelia	MP:0012545	0.21% (1/467)	0.0% (0/11223)	0.04	1	1
│├ abnormal nervous system tract morphology	MP:0000778	3.0% (14/467)	1.19% (134/11223)	0.002	0.033	0.628
││└ abnormal brain commissure morphology	MP:0002199	2.78% (13/467)	1.02% (115/11223)	0.002	0.044	1
││ └ abnormal dorsal telencephalic commissure morphology	MP:0008219	2.36% (11/467)	0.8% (90/11223)	0.002	0.055	1
││ └ abnormal corpus callosum morphology	MP:0000780	2.36% (11/467)	0.78% (87/11223)	0.002	0.066	1
││ ├ abnormal corpus callosum size	MP:0020573	1.28% (6/467)	0.22% (25/11223)	0.001	0.034	0.436
││ │└ decreased corpus callosum size	MP:0000781	1.28% (6/467)	0.21% (24/11223)	0.001	0.028	0.28
││ └ absent corpus callosum	MP:0002196	0.86% (4/467)	0.26% (29/11223)	0.041	0.255	1
│├ abnormal nervous system development	MP:0003861	12.63% (59/467)	8.92% (1001/11223)	0.005	0.06	1
││├ abnormal brain development	MP:0000913	7.92% (37/467)	5.48% (615/11223)	0.019	0.199	1
│││├ abnormal hindbrain development	MP:0006108	3.0% (14/467)	1.09% (122/11223)	0.001	0.036	0.717
││││└ abnormal cerebellum development	MP:0000854	2.14% (10/467)	0.72% (81/11223)	0.003	0.086	1
││││ ├ abnormal cerebellar foliation	MP:0000857	1.71% (8/467)	0.45% (51/11223)	0.002	0.058	0.872
││││ │├ abnormal cerebellar lobule formation	MP:0006097	1.07% (5/467)	0.04% (5/11223)	2.125e-05	0.0009917	0.00595
││││ │└ reduced cerebellar foliation	MP:0009719	0.86% (4/467)	0.15% (17/11223)	0.009	0.11	1
││││ └ abnormal cerebellum external granule cell layer morphology	MP:0000872	1.07% (5/467)	0.35% (39/11223)	0.03	0.222	1
│││└ abnormal midbrain-hindbrain boundary morphology	MP:0012132	0.64% (3/467)	0.12% (13/11223)	0.024	0.236	1
│││ ├ absent midbrain-hindbrain boundary	MP:0012133	0.43% (2/467)	0.02% (2/11223)	0.009	0.177	1
│││ └ abnormal midbrain-hindbrain boundary development	MP:0004096	0.43% (2/467)	0.06% (7/11223)	0.048	0.329	1
││├ abnormal neural plate morphology	MP:0005657	0.86% (4/467)	0.2% (22/11223)	0.019	0.199	1
││└ abnormal neural tube morphology	MP:0002151	5.35% (25/467)	4.09% (459/11223)	0.113	0.432	1
││ └ abnormal neural crest morphology	MP:0009846	0.43% (2/467)	0.23% (26/11223)	0.309	0.621	1
││ └ abnormal neural crest cell morphology	MP:0009845	0.43% (2/467)	0.21% (24/11223)	0.279	0.643	1
││ ├ decreased neural crest cell number	MP:0009843	0.43% (2/467)	0.05% (6/11223)	0.038	0.244	1
││ │└ decreased cardiac neural crest cell number	MP:0012749	0.21% (1/467)	0.0% (0/11223)	0.04	1	1
││ │ └ absent cardiac neural crest cells	MP:0012750	0.21% (1/467)	0.0% (0/11223)	0.04	1	1
││ └ abnormal cardiac neural crest cell morphology	MP:0012747	0.21% (1/467)	0.02% (2/11223)	0.115	1	1
││ └ decreased cardiac neural crest cell number	MP:0012749	0.21% (1/467)	0.0% (0/11223)	0.04	1	1
││ └ absent cardiac neural crest cells	MP:0012750	0.21% (1/467)	0.0% (0/11223)	0.04	1	1
│├ abnormal innervation	MP:0002184	2.78% (13/467)	1.43% (160/11223)	0.021	0.183	1
││└ abnormal Purkinje cell innervation	MP:0003894	0.43% (2/467)	0.04% (4/11223)	0.021	0.199	1
│├ abnormal somatic nervous system morphology	MP:0002752	8.35% (39/467)	7.94% (891/11223)	0.399	0.896	1
││├ abnormal cranial ganglia morphology	MP:0001081	2.14% (10/467)	1.92% (215/11223)	0.411	0.773	1
│││├ abnormal geniculate ganglion morphology	MP:0001082	0.64% (3/467)	0.12% (14/11223)	0.028	0.236	1
│││├ abnormal glossopharyngeal ganglion morphology	MP:0001096	0.64% (3/467)	0.25% (28/11223)	0.125	0.421	1
││││└ abnormal petrosal ganglion morphology	MP:0001084	0.64% (3/467)	0.1% (11/11223)	0.017	0.262	1
│││├ abnormal trigeminal ganglion morphology	MP:0001092	0.64% (3/467)	0.45% (50/11223)	0.356	0.666	1
││││└ small trigeminal ganglion	MP:0001093	0.64% (3/467)	0.12% (14/11223)	0.028	0.296	1
│││└ abnormal vestibular ganglion morphology	MP:0002856	0.21% (1/467)	0.2% (22/11223)	0.609	1	1
│││ └ absent vestibular ganglion	MP:0004299	0.21% (1/467)	0.0% (0/11223)	0.04	1	1
││├ abnormal somatic sensory system morphology	MP:0000959	5.57% (26/467)	5.3% (595/11223)	0.431	0.78	1
│││├ abnormal mechanoreceptor morphology	MP:0000972	2.57% (12/467)	1.75% (196/11223)	0.129	0.423	1
││││└ abnormal hair cell morphology	MP:0000045	2.36% (11/467)	1.6% (180/11223)	0.143	0.493	1
││││ └ abnormal cochlear hair cell morphology	MP:0002622	2.14% (10/467)	1.53% (172/11223)	0.193	0.529	1
││││ ├ cochlear hair cell degeneration	MP:0004362	1.5% (7/467)	0.75% (84/11223)	0.071	0.355	1
││││ │└ cochlear outer hair cell degeneration	MP:0004404	1.5% (7/467)	0.6% (67/11223)	0.028	0.18	1
││││ ├ abnormal cochlear hair cell number	MP:0004406	1.07% (5/467)	0.51% (57/11223)	0.101	0.41	1
││││ │└ decreased cochlear hair cell number	MP:0004408	0.86% (4/467)	0.41% (46/11223)	0.138	0.458	1
││││ │ └ decreased cochlear outer hair cell number	MP:0004402	0.86% (4/467)	0.28% (31/11223)	0.05	0.258	1
││││ └ abnormal cochlear outer hair cell morphology	MP:0004399	1.93% (9/467)	1.19% (134/11223)	0.119	0.422	1
││││ ├ short cochlear outer hair cells	MP:0004466	0.43% (2/467)	0.04% (4/11223)	0.021	0.144	1
││││ ├ cochlear outer hair cell degeneration	MP:0004404	1.5% (7/467)	0.6% (67/11223)	0.028	0.18	1
││││ └ abnormal cochlear outer hair cell number	MP:0004400	1.07% (5/467)	0.37% (42/11223)	0.039	0.204	1
││││ └ decreased cochlear outer hair cell number	MP:0004402	0.86% (4/467)	0.28% (31/11223)	0.05	0.258	1
│││├ abnormal sensory neuron morphology	MP:0000965	3.64% (17/467)	3.45% (387/11223)	0.448	0.74	1
││││└ decreased sensory neuron number	MP:0000966	1.5% (7/467)	1.28% (144/11223)	0.399	0.772	1
││││ └ decreased cochlear hair cell number	MP:0004408	0.86% (4/467)	0.41% (46/11223)	0.138	0.462	1
││││ └ decreased cochlear outer hair cell number	MP:0004402	0.86% (4/467)	0.28% (31/11223)	0.05	0.311	1
│││└ abnormal sensory ganglion morphology	MP:0000960	1.93% (9/467)	1.92% (215/11223)	0.541	0.82	1
│││ ├ abnormal geniculate ganglion morphology	MP:0001082	0.64% (3/467)	0.12% (14/11223)	0.028	0.296	1
│││ └ abnormal trigeminal ganglion morphology	MP:0001092	0.64% (3/467)	0.45% (50/11223)	0.356	0.737	1
│││ └ small trigeminal ganglion	MP:0001093	0.64% (3/467)	0.12% (14/11223)	0.028	0.222	1
││└ abnormal cranial nerve morphology	MP:0001056	2.14% (10/467)	2.11% (237/11223)	0.529	0.839	1
││ └ abnormal facial nerve morphology	MP:0001071	0.86% (4/467)	0.21% (24/11223)	0.024	0.236	1
│├ neurodegeneration	MP:0002229	3.43% (16/467)	3.15% (353/11223)	0.404	0.896	1
││└ neuron degeneration	MP:0003224	2.78% (13/467)	2.53% (284/11223)	0.408	0.773	1
││ └ cochlear hair cell degeneration	MP:0004362	1.5% (7/467)	0.75% (84/11223)	0.071	0.333	1
││ └ cochlear outer hair cell degeneration	MP:0004404	1.5% (7/467)	0.6% (67/11223)	0.028	0.296	1
│└ abnormal autonomic nervous system morphology	MP:0002751	0.86% (4/467)	0.76% (85/11223)	0.478	0.954	1
│ └ abnormal parasympathetic system morphology	MP:0001033	0.64% (3/467)	0.08% (9/11223)	0.011	0.149	1
│ └ abnormal parasympathetic ganglion morphology	MP:0001034	0.43% (2/467)	0.05% (6/11223)	0.038	0.252	1
│ └ abnormal sublingual ganglion morphology	MP:0010105	0.21% (1/467)	0.0% (0/11223)	0.04	1	1
└ abnormal nervous system physiology	MP:0003633	20.56% (96/467)	15.99% (1794/11223)	0.006	0.047	0.42
├ abnormal synaptic transmission	MP:0003635	11.56% (54/467)	6.88% (772/11223)	0.000213	0.006	0.066882
│├ abnormal CNS synaptic transmission	MP:0002206	10.49% (49/467)	4.99% (560/11223)	2.046e-06	0.0002036	0.00122146
││├ abnormal glutamate-mediated receptor currents	MP:0002886	2.36% (11/467)	0.35% (39/11223)	3.345e-06	0.0003124	0.00239836
│││└ abnormal AMPA-mediated synaptic currents	MP:0002885	1.93% (9/467)	0.15% (17/11223)	4.087e-07	6.447e-05	0.00025789
│││ ├ reduced AMPA-mediated synaptic currents	MP:0011003	0.86% (4/467)	0.06% (7/11223)	0.0006632	0.029	0.289155
│││ └ enhanced AMPA-mediated synaptic currents	MP:0011002	0.43% (2/467)	0.03% (3/11223)	0.015	0.172	1
││├ abnormal long term potentiation	MP:0002207	4.28% (20/467)	1.68% (189/11223)	0.000266	0.014	0.190722
│││├ enhanced long term potentiation	MP:0003008	1.5% (7/467)	0.49% (55/11223)	0.011	0.198	1
│││└ reduced long term potentiation	MP:0001473	2.14% (10/467)	1.06% (119/11223)	0.034	0.306	1
││├ abnormal excitatory postsynaptic potential	MP:0002912	2.36% (11/467)	0.67% (75/11223)	0.0006	0.024	0.4302
││├ abnormal synaptic depression	MP:0002915	2.36% (11/467)	0.76% (85/11223)	0.002	0.055	1
│││└ abnormal long term depression	MP:0001898	2.14% (10/467)	0.56% (63/11223)	0.0006099	0.035	0.384847
│││ ├ absent long term depression	MP:0001899	1.28% (6/467)	0.22% (25/11223)	0.001	0.034	0.436
│││ └ reduced long term depression	MP:0001475	1.07% (5/467)	0.29% (33/11223)	0.017	0.19	1
││├ abnormal excitatory postsynaptic currents	MP:0002910	2.36% (11/467)	0.89% (100/11223)	0.005	0.097	1
││├ abnormal miniature excitatory postsynaptic currents	MP:0004753	1.93% (9/467)	0.89% (100/11223)	0.03	0.236	1
││└ abnormal GABA-mediated receptor currents	MP:0004008	0.64% (3/467)	0.13% (15/11223)	0.033	0.246	1
│└ abnormal paired-pulse facilitation	MP:0002918	1.28% (6/467)	0.47% (53/11223)	0.03	0.233	1
│ └ enhanced paired-pulse facilitation	MP:0002919	0.86% (4/467)	0.26% (29/11223)	0.041	0.265	1
├ abnormal nervous system electrophysiology	MP:0002272	4.71% (22/467)	2.24% (251/11223)	0.001	0.02	0.314
│├ abnormal afterhyperpolarization	MP:0003412	0.64% (3/467)	0.09% (10/11223)	0.013	0.158	1
│├ abnormal action potential	MP:0005402	2.14% (10/467)	0.91% (102/11223)	0.014	0.167	1
│└ abnormal nerve fiber response	MP:0003477	0.21% (1/467)	0.12% (13/11223)	0.435	1	1
│ └ abnormal cochlear nerve fiber response	MP:0006324	0.21% (1/467)	0.0% (0/11223)	0.04	1	1
├ seizures	MP:0002064	5.14% (24/467)	2.74% (307/11223)	0.004	0.05	1
│├ abnormal seizure response to inducing agent	MP:0009357	2.78% (13/467)	1.44% (162/11223)	0.023	0.208	1
││├ decreased susceptibility to induction of seizure by inducing agent	MP:0012348	1.07% (5/467)	0.2% (23/11223)	0.005	0.097	1
│││└ decreased susceptibility to pharmacologically induced seizures	MP:0002887	1.07% (5/467)	0.2% (23/11223)	0.005	0.121	1
││├ abnormal seizure response to pharmacological agent	MP:0000950	2.14% (10/467)	1.02% (114/11223)	0.027	0.236	1
│││└ decreased susceptibility to pharmacologically induced seizures	MP:0002887	1.07% (5/467)	0.2% (23/11223)	0.005	0.121	1
││└ environmentally induced seizures	MP:0009358	0.86% (4/467)	0.29% (33/11223)	0.059	0.313	1
││ └ audiogenic seizures	MP:0001496	0.64% (3/467)	0.15% (17/11223)	0.044	0.329	1
│└ convulsive seizures	MP:0000947	2.14% (10/467)	1.23% (138/11223)	0.073	0.354	1
│ └ audiogenic seizures	MP:0001496	0.64% (3/467)	0.15% (17/11223)	0.044	0.271	1
├ abnormal synaptic plasticity	MP:0004859	1.5% (7/467)	0.43% (48/11223)	0.006	0.07	1
│└ impaired synaptic plasticity	MP:0001900	0.86% (4/467)	0.26% (29/11223)	0.041	0.272	1
├ abnormal neuron physiology	MP:0004811	6.42% (30/467)	4.67% (524/11223)	0.055	0.319	1
│└ abnormal sensory neuron physiology	MP:0010055	1.07% (5/467)	0.46% (52/11223)	0.077	0.371	1
│ └ abnormal hair cell physiology	MP:0003879	1.07% (5/467)	0.33% (37/11223)	0.025	0.236	1
│ └ abnormal cochlear hair cell physiology	MP:0004432	1.07% (5/467)	0.27% (30/11223)	0.012	0.21	1
│ ├ abnormal cochlear inner hair cell physiology	MP:0004433	0.64% (3/467)	0.09% (10/11223)	0.013	0.167	1
│ └ abnormal cochlear outer hair cell physiology	MP:0004434	0.64% (3/467)	0.18% (20/11223)	0.062	0.33	1
│ ├ abnormal cochlear outer hair cell electromotility	MP:0004435	0.43% (2/467)	0.0% (0/11223)	0.002	1	1
│ │├ decreased cochlear outer hair cell electromotility	MP:0004437	0.43% (2/467)	0.0% (0/11223)	0.002	1	1
│ │└ absent cochlear outer hair cell electromotility	MP:0004436	0.21% (1/467)	0.0% (0/11223)	0.04	1	1
│ └ abnormal cochlear microphonics	MP:0004412	0.43% (2/467)	0.12% (13/11223)	0.119	0.422	1
│ └ decreased cochlear microphonics	MP:0004414	0.43% (2/467)	0.04% (4/11223)	0.021	0.144	1
└ abnormal somatic nervous system physiology	MP:0005423	1.28% (6/467)	0.56% (63/11223)	0.057	0.319	1
└ abnormal sensory neuron physiology	MP:0010055	1.07% (5/467)	0.46% (52/11223)	0.077	0.371	1
└ abnormal hair cell physiology	MP:0003879	1.07% (5/467)	0.33% (37/11223)	0.025	0.236	1
└ abnormal cochlear hair cell physiology	MP:0004432	1.07% (5/467)	0.27% (30/11223)	0.012	0.21	1
├ abnormal cochlear inner hair cell physiology	MP:0004433	0.64% (3/467)	0.09% (10/11223)	0.013	0.167	1
└ abnormal cochlear outer hair cell physiology	MP:0004434	0.64% (3/467)	0.18% (20/11223)	0.062	0.33	1
├ abnormal cochlear outer hair cell electromotility	MP:0004435	0.43% (2/467)	0.0% (0/11223)	0.002	1	1
│├ decreased cochlear outer hair cell electromotility	MP:0004437	0.43% (2/467)	0.0% (0/11223)	0.002	1	1
│└ absent cochlear outer hair cell electromotility	MP:0004436	0.21% (1/467)	0.0% (0/11223)	0.04	1	1
└ abnormal cochlear microphonics	MP:0004412	0.43% (2/467)	0.12% (13/11223)	0.119	0.422	1
└ decreased cochlear microphonics	MP:0004414	0.43% (2/467)	0.04% (4/11223)	0.021	0.144	1
■ cellular phenotype	MP:0005384	37.26% (174/467)	32.79% (3680/11223)	0.026	0.146	0.728
├ maternal effect	MP:0003718	1.28% (6/467)	0.53% (60/11223)	0.048	0.258	1
├ abnormal cell morphology	MP:0000358	10.71% (50/467)	9.54% (1071/11223)	0.222	0.676	1
│└ abnormal germ cell morphology	MP:0002208	6.0% (28/467)	5.52% (619/11223)	0.357	0.849	1
│ └ abnormal primordial germ cell morphology	MP:0008391	0.86% (4/467)	0.25% (28/11223)	0.037	0.255	1
└ abnormal cell physiology	MP:0005621	31.05% (145/467)	29.44% (3304/11223)	0.242	0.68	1
├ abnormal cellular glucose import	MP:0003925	1.28% (6/467)	0.44% (49/11223)	0.022	0.187	1
│└ abnormal muscle cell glucose uptake	MP:0004130	1.07% (5/467)	0.38% (43/11223)	0.042	0.276	1
├ abnormal cell proliferation	MP:0000350	13.28% (62/467)	10.39% (1166/11223)	0.031	0.221	1
│├ decreased cell proliferation	MP:0000352	9.21% (43/467)	5.87% (659/11223)	0.003	0.056	1
││├ decreased fibroblast proliferation	MP:0011704	1.93% (9/467)	0.89% (100/11223)	0.03	0.236	1
││└ decreased inner cell mass proliferation	MP:0012113	1.28% (6/467)	0.55% (62/11223)	0.054	0.3	1
││ └ absent inner cell mass proliferation	MP:0012114	1.07% (5/467)	0.34% (38/11223)	0.028	0.296	1
│├ abnormal fetal cardiomyocyte proliferation	MP:0003567	1.28% (6/467)	0.27% (30/11223)	0.003	0.056	1
│├ abnormal fibroblast proliferation	MP:0011702	2.36% (11/467)	1.23% (138/11223)	0.036	0.255	1
││└ decreased fibroblast proliferation	MP:0011704	1.93% (9/467)	0.89% (100/11223)	0.03	0.236	1
│├ abnormal trophectoderm cell proliferation	MP:0012115	0.43% (2/467)	0.05% (6/11223)	0.038	0.255	1
││└ absent trophectoderm cell proliferation	MP:0012118	0.43% (2/467)	0.02% (2/11223)	0.009	0.137	1
│└ abnormal inner cell mass proliferation	MP:0004966	1.28% (6/467)	0.59% (66/11223)	0.067	0.348	1
│ └ decreased inner cell mass proliferation	MP:0012113	1.28% (6/467)	0.55% (62/11223)	0.054	0.3	1
│ └ absent inner cell mass proliferation	MP:0012114	1.07% (5/467)	0.34% (38/11223)	0.028	0.296	1
├ abnormal fibroblast physiology	MP:0020414	3.0% (14/467)	1.92% (216/11223)	0.077	0.372	1
│└ abnormal fibroblast proliferation	MP:0011702	2.36% (11/467)	1.23% (138/11223)	0.036	0.255	1
│ └ decreased fibroblast proliferation	MP:0011704	1.93% (9/467)	0.89% (100/11223)	0.03	0.236	1
├ abnormal cell death	MP:0000313	13.49% (63/467)	11.4% (1279/11223)	0.096	0.431	1
│├ increased cell death	MP:0012556	8.57% (40/467)	6.08% (682/11223)	0.022	0.205	1
││└ increased apoptosis	MP:0006042	8.57% (40/467)	6.0% (673/11223)	0.018	0.215	1
││ ├ increased otic epithelial cell apoptosis	MP:0008063	0.21% (1/467)	0.0% (0/11223)	0.04	1	1
││ └ increased embryonic tissue cell apoptosis	MP:0013504	1.93% (9/467)	1.38% (155/11223)	0.21	0.584	1
││ └ increased ectoderm apoptosis	MP:0003895	0.43% (2/467)	0.04% (5/11223)	0.029	0.222	1
│├ abnormal apoptosis	MP:0001648	11.56% (54/467)	10.03% (1126/11223)	0.159	0.489	1
││├ increased apoptosis	MP:0006042	8.57% (40/467)	6.0% (673/11223)	0.018	0.215	1
│││├ increased otic epithelial cell apoptosis	MP:0008063	0.21% (1/467)	0.0% (0/11223)	0.04	1	1
│││└ increased embryonic tissue cell apoptosis	MP:0013504	1.93% (9/467)	1.38% (155/11223)	0.21	0.584	1
│││ └ increased ectoderm apoptosis	MP:0003895	0.43% (2/467)	0.04% (5/11223)	0.029	0.222	1
││├ abnormal cardiomyocyte apoptosis	MP:0003221	0.86% (4/467)	0.36% (40/11223)	0.098	0.374	1
│││└ decreased cardiomyocyte apoptosis	MP:0003223	0.43% (2/467)	0.04% (5/11223)	0.029	0.296	1
││├ abnormal embryonic tissue cell apoptosis	MP:0013503	2.36% (11/467)	1.59% (178/11223)	0.136	0.426	1
│││└ increased embryonic tissue cell apoptosis	MP:0013504	1.93% (9/467)	1.38% (155/11223)	0.21	0.584	1
│││ └ increased ectoderm apoptosis	MP:0003895	0.43% (2/467)	0.04% (5/11223)	0.029	0.222	1
││└ decreased apoptosis	MP:0006043	2.14% (10/467)	1.78% (200/11223)	0.33	0.646	1
││ └ decreased cardiomyocyte apoptosis	MP:0003223	0.43% (2/467)	0.04% (5/11223)	0.029	0.296	1
│└ decreased cell death	MP:0012555	2.14% (10/467)	1.84% (206/11223)	0.362	0.72	1
│ └ decreased apoptosis	MP:0006043	2.14% (10/467)	1.78% (200/11223)	0.33	0.646	1
│ └ decreased cardiomyocyte apoptosis	MP:0003223	0.43% (2/467)	0.04% (5/11223)	0.029	0.296	1
└ abnormal cell differentiation	MP:0005076	5.14% (24/467)	5.09% (571/11223)	0.511	0.966	1
└ abnormal osteoblast differentiation	MP:0008395	0.64% (3/467)	0.42% (47/11223)	0.323	0.691	1
└ enhanced osteoblast differentiation	MP:0011710	0.43% (2/467)	0.05% (6/11223)	0.038	0.252	1
■ muscle phenotype	MP:0005369	13.28% (62/467)	11.03% (1238/11223)	0.078	0.35	1
├ abnormal muscle physiology	MP:0002106	8.57% (40/467)	6.56% (736/11223)	0.057	0.285	1
│├ abnormal fetal cardiomyocyte proliferation	MP:0003567	1.28% (6/467)	0.27% (30/11223)	0.003	0.041	0.942
│├ abnormal muscle cell glucose uptake	MP:0004130	1.07% (5/467)	0.38% (43/11223)	0.042	0.269	1
│└ abnormal cardiomyocyte apoptosis	MP:0003221	0.86% (4/467)	0.36% (40/11223)	0.098	0.432	1
│ └ decreased cardiomyocyte apoptosis	MP:0003223	0.43% (2/467)	0.04% (5/11223)	0.029	0.231	1
└ abnormal muscle morphology	MP:0002108	9.85% (46/467)	7.97% (895/11223)	0.088	0.398	1
├ abnormal skeletal muscle morphology	MP:0000759	3.85% (18/467)	3.09% (347/11223)	0.21	0.68	1
│├ skeletal muscle fibrosis	MP:0009419	0.86% (4/467)	0.17% (19/11223)	0.012	0.156	1
│├ abnormal skeletal muscle mass	MP:0004817	1.71% (8/467)	0.9% (101/11223)	0.07	0.348	1
││├ decreased skeletal muscle mass	MP:0004819	1.71% (8/467)	0.8% (90/11223)	0.042	0.266	1
│││└ decreased skeletal muscle size	MP:0010240	0.86% (4/467)	0.48% (54/11223)	0.201	0.575	1
│││ └ skeletal muscle hypoplasia	MP:0009460	0.21% (1/467)	0.03% (3/11223)	0.15	1	1
│││ └ tongue muscle hypoplasia	MP:0030421	0.21% (1/467)	0.0% (0/11223)	0.04	1	1
││└ abnormal skeletal muscle size	MP:0009458	0.86% (4/467)	0.55% (62/11223)	0.27	0.58	1
││ └ decreased skeletal muscle size	MP:0010240	0.86% (4/467)	0.48% (54/11223)	0.201	0.575	1
││ └ skeletal muscle hypoplasia	MP:0009460	0.21% (1/467)	0.03% (3/11223)	0.15	1	1
││ └ tongue muscle hypoplasia	MP:0030421	0.21% (1/467)	0.0% (0/11223)	0.04	1	1
│└ abnormal tongue muscle morphology	MP:0004136	0.21% (1/467)	0.11% (12/11223)	0.412	1	1
│ └ tongue muscle hypoplasia	MP:0030421	0.21% (1/467)	0.0% (0/11223)	0.04	1	1
├ abnormal cardiac muscle tissue morphology	MP:0010630	4.28% (20/467)	3.68% (413/11223)	0.283	0.773	1
│├ abnormal impulse conducting system morphology	MP:0004123	0.43% (2/467)	0.08% (9/11223)	0.069	0.348	1
││└ abnormal sinoatrial node morphology	MP:0004115	0.43% (2/467)	0.04% (5/11223)	0.029	0.236	1
│└ abnormal myocardium layer morphology	MP:0005329	3.85% (18/467)	3.21% (360/11223)	0.254	0.599	1
│ └ myocardium hypoplasia	MP:0010500	1.5% (7/467)	0.67% (75/11223)	0.045	0.271	1
└ muscle hypoplasia	MP:0000734	0.21% (1/467)	0.11% (12/11223)	0.412	1	1
└ skeletal muscle hypoplasia	MP:0009460	0.21% (1/467)	0.03% (3/11223)	0.15	1	1
└ tongue muscle hypoplasia	MP:0030421	0.21% (1/467)	0.0% (0/11223)	0.04	1	1
■ craniofacial phenotype	MP:0005382	11.13% (52/467)	9.18% (1030/11223)	0.091	0.35	1
└ abnormal craniofacial morphology	MP:0000428	11.13% (52/467)	9.18% (1030/11223)	0.091	0.398	1
├ abnormal craniofacial development	MP:0003935	4.71% (22/467)	3.11% (349/11223)	0.042	0.269	1
│├ craniofacial asymmetry	MP:0008863	0.21% (1/467)	0.01% (1/11223)	0.078	1	1
││└ facial asymmetry	MP:0030099	0.21% (1/467)	0.0% (0/11223)	0.04	1	1
││ └ hemifacial hypoplasia	MP:0030100	0.21% (1/467)	0.0% (0/11223)	0.04	1	1
│└ abnormal palate development	MP:0009653	1.5% (7/467)	0.87% (98/11223)	0.127	0.443	1
│ └ abnormal secondary palate development	MP:0009655	1.28% (6/467)	0.85% (95/11223)	0.216	0.531	1
│ └ abnormal palatal shelf fusion at midline	MP:0009887	1.28% (6/467)	0.53% (60/11223)	0.048	0.329	1
├ abnormal craniofacial bone morphology	MP:0002116	7.49% (35/467)	5.62% (631/11223)	0.058	0.319	1
│├ abnormal cranium morphology	MP:0000438	7.49% (35/467)	5.51% (618/11223)	0.046	0.292	1
││├ abnormal cranium size	MP:0010031	1.71% (8/467)	0.6% (67/11223)	0.01	0.146	1
│││├ decreased cranium width	MP:0008526	0.43% (2/467)	0.05% (6/11223)	0.038	0.316	1
│││└ increased cranium height	MP:0011861	0.21% (1/467)	0.0% (0/11223)	0.04	1	1
││├ abnormal neurocranium morphology	MP:0000074	3.21% (15/467)	2.03% (228/11223)	0.063	0.325	1
│││├ abnormal fontanelle morphology	MP:0000084	0.86% (4/467)	0.13% (15/11223)	0.006	0.14	1
││││└ small fontanelles	MP:0030389	0.21% (1/467)	0.0% (0/11223)	0.04	1	1
│││├ overlapping parietal bones	MP:0000082	0.21% (1/467)	0.0% (0/11223)	0.04	1	1
│││├ abnormal temporal bone morphology	MP:0005272	0.86% (4/467)	0.43% (48/11223)	0.153	0.502	1
││││└ abnormal temporal bone petrous part morphology	MP:0030319	0.43% (2/467)	0.21% (24/11223)	0.279	0.611	1
││││ ├ abnormal round window morphology	MP:0004480	0.21% (1/467)	0.0% (0/11223)	0.04	1	1
││││ │├ small round window	MP:0030411	0.21% (1/467)	0.0% (0/11223)	0.04	1	1
││││ │└ absent round window	MP:0030412	0.21% (1/467)	0.0% (0/11223)	0.04	1	1
││││ └ absent temporal bone petrous part	MP:0030329	0.21% (1/467)	0.0% (0/11223)	0.04	1	1
│││├ abnormal parietal bone morphology	MP:0000109	0.64% (3/467)	0.48% (54/11223)	0.4	0.772	1
││││└ overlapping parietal bones	MP:0000082	0.21% (1/467)	0.0% (0/11223)	0.04	1	1
│││└ abnormal occipital bone morphology	MP:0005269	0.86% (4/467)	0.73% (82/11223)	0.452	0.803	1
│││ └ abnormal exoccipital bone morphology	MP:0000080	0.21% (1/467)	0.12% (13/11223)	0.435	1	1
│││ └ absent exoccipital bone	MP:0030028	0.21% (1/467)	0.0% (0/11223)	0.04	1	1
││├ abnormal basicranium morphology	MP:0010029	1.5% (7/467)	0.89% (100/11223)	0.136	0.426	1
│││└ abnormal temporal bone petrous part morphology	MP:0030319	0.43% (2/467)	0.21% (24/11223)	0.279	0.643	1
│││ ├ abnormal round window morphology	MP:0004480	0.21% (1/467)	0.0% (0/11223)	0.04	1	1
│││ │├ small round window	MP:0030411	0.21% (1/467)	0.0% (0/11223)	0.04	1	1
│││ │└ absent round window	MP:0030412	0.21% (1/467)	0.0% (0/11223)	0.04	1	1
│││ └ absent temporal bone petrous part	MP:0030329	0.21% (1/467)	0.0% (0/11223)	0.04	1	1
││├ abnormal viscerocranium morphology	MP:0005274	4.71% (22/467)	3.87% (434/11223)	0.208	0.521	1
│││├ abnormal jaw morphology	MP:0000454	4.5% (21/467)	3.41% (383/11223)	0.131	0.484	1
││││├ abnormal maxilla morphology	MP:0000455	2.14% (10/467)	0.91% (102/11223)	0.014	0.172	1
│││││├ absent maxilla	MP:0004539	0.43% (2/467)	0.05% (6/11223)	0.038	0.26	1
│││││└ abnormal premaxilla morphology	MP:0002820	0.64% (3/467)	0.21% (24/11223)	0.091	0.389	1
│││││ └ absent premaxilla	MP:0000090	0.43% (2/467)	0.0% (0/11223)	0.002	1	1
││││└ agnathia	MP:0030268	0.43% (2/467)	0.19% (21/11223)	0.234	0.572	1
││││ └ absent maxilla	MP:0004539	0.43% (2/467)	0.05% (6/11223)	0.038	0.26	1
│││├ absent facial bone	MP:0030385	0.64% (3/467)	0.33% (37/11223)	0.214	0.585	1
││││├ absent premaxilla	MP:0000090	0.43% (2/467)	0.0% (0/11223)	0.002	1	1
││││└ absent maxilla	MP:0004539	0.43% (2/467)	0.05% (6/11223)	0.038	0.244	1
│││└ abnormal hyoid bone morphology	MP:0003056	0.43% (2/467)	0.27% (30/11223)	0.368	0.751	1
│││ └ abnormal hyoid bone greater horn morphology	MP:0009913	0.21% (1/467)	0.04% (5/11223)	0.217	1	1
│││ └ absent hyoid bone greater horns	MP:0009916	0.21% (1/467)	0.0% (0/11223)	0.04	1	1
││└ abnormal cranial foramen morphology	MP:0030310	0.43% (2/467)	0.21% (24/11223)	0.279	0.592	1
││ └ abnormal round window morphology	MP:0004480	0.21% (1/467)	0.0% (0/11223)	0.04	1	1
││ ├ small round window	MP:0030411	0.21% (1/467)	0.0% (0/11223)	0.04	1	1
││ └ absent round window	MP:0030412	0.21% (1/467)	0.0% (0/11223)	0.04	1	1
│└ abnormal middle ear ossicle morphology	MP:0005105	0.64% (3/467)	0.56% (63/11223)	0.494	0.82	1
│ └ abnormal malleus morphology	MP:0000029	0.43% (2/467)	0.23% (26/11223)	0.309	0.621	1
│ └ abnormal malleus processus brevis morphology	MP:0010324	0.43% (2/467)	0.04% (5/11223)	0.029	0.296	1
│ └ absent malleus processus brevis	MP:0003110	0.43% (2/467)	0.03% (3/11223)	0.015	0.172	1
├ abnormal outer ear morphology	MP:0002177	1.71% (8/467)	0.86% (97/11223)	0.059	0.319	1
│└ abnormal ear position	MP:0000023	0.86% (4/467)	0.21% (24/11223)	0.024	0.214	1
└ abnormal facial morphology	MP:0003743	5.78% (27/467)	5.89% (661/11223)	0.568	0.967	1
├ abnormal face development	MP:0030313	0.21% (1/467)	0.01% (1/11223)	0.078	1	1
│└ facial asymmetry	MP:0030099	0.21% (1/467)	0.0% (0/11223)	0.04	1	1
│ └ hemifacial hypoplasia	MP:0030100	0.21% (1/467)	0.0% (0/11223)	0.04	1	1
├ abnormal face shape	MP:0030071	0.43% (2/467)	0.18% (20/11223)	0.219	0.545	1
│└ facial asymmetry	MP:0030099	0.21% (1/467)	0.0% (0/11223)	0.04	1	1
│ └ hemifacial hypoplasia	MP:0030100	0.21% (1/467)	0.0% (0/11223)	0.04	1	1
├ abnormal mouth morphology	MP:0000452	4.71% (22/467)	4.22% (474/11223)	0.336	0.708	1
│├ abnormal palate morphology	MP:0003755	2.57% (12/467)	2.21% (248/11223)	0.346	0.658	1
││├ abnormal palate development	MP:0009653	1.5% (7/467)	0.87% (98/11223)	0.127	0.484	1
│││└ abnormal secondary palate development	MP:0009655	1.28% (6/467)	0.85% (95/11223)	0.216	0.558	1
│││ └ abnormal palatal shelf fusion at midline	MP:0009887	1.28% (6/467)	0.53% (60/11223)	0.048	0.305	1
││├ cleft palate	MP:0000111	2.57% (12/467)	1.93% (217/11223)	0.206	0.578	1
│││└ cleft secondary palate	MP:0009890	1.71% (8/467)	1.04% (117/11223)	0.127	0.447	1
│││ └ cleft hard palate	MP:0013545	1.28% (6/467)	0.69% (77/11223)	0.114	0.422	1
│││ └ abnormal palatal shelf fusion at midline	MP:0009887	1.28% (6/467)	0.53% (60/11223)	0.048	0.245	1
││└ abnormal secondary palate morphology	MP:0013550	1.71% (8/467)	1.25% (140/11223)	0.24	0.611	1
││ ├ cleft secondary palate	MP:0009890	1.71% (8/467)	1.04% (117/11223)	0.127	0.447	1
││ │└ cleft hard palate	MP:0013545	1.28% (6/467)	0.69% (77/11223)	0.114	0.422	1
││ │ └ abnormal palatal shelf fusion at midline	MP:0009887	1.28% (6/467)	0.53% (60/11223)	0.048	0.245	1
││ └ abnormal hard palate morphology	MP:0003756	1.5% (7/467)	0.93% (104/11223)	0.156	0.486	1
││ └ cleft hard palate	MP:0013545	1.28% (6/467)	0.69% (77/11223)	0.114	0.422	1
││ └ abnormal palatal shelf fusion at midline	MP:0009887	1.28% (6/467)	0.53% (60/11223)	0.048	0.245	1
│└ abnormal tongue morphology	MP:0000762	0.43% (2/467)	0.85% (95/11223)	0.904	1	1
│ └ abnormal tongue muscle morphology	MP:0004136	0.21% (1/467)	0.11% (12/11223)	0.412	1	1
│ └ tongue muscle hypoplasia	MP:0030421	0.21% (1/467)	0.0% (0/11223)	0.04	1	1
├ abnormal face size	MP:0030063	0.43% (2/467)	0.25% (28/11223)	0.338	0.708	1
│└ small face	MP:0030064	0.43% (2/467)	0.23% (26/11223)	0.309	0.621	1
│ └ face hypoplasia	MP:0030065	0.21% (1/467)	0.07% (8/11223)	0.307	1	1
│ └ hemifacial hypoplasia	MP:0030100	0.21% (1/467)	0.0% (0/11223)	0.04	1	1
└ abnormal midface morphology	MP:0030095	0.21% (1/467)	0.14% (16/11223)	0.5	1	1
├ abnormal periauricular region morphology	MP:0030096	0.21% (1/467)	0.0% (0/11223)	0.04	1	1
│└ preauricular pit	MP:0030097	0.21% (1/467)	0.0% (0/11223)	0.04	1	1
└ abnormal cheek morphology	MP:0030246	0.21% (1/467)	0.02% (2/11223)	0.115	1	1
└ abnormal periauricular region morphology	MP:0030096	0.21% (1/467)	0.0% (0/11223)	0.04	1	1
└ preauricular pit	MP:0030097	0.21% (1/467)	0.0% (0/11223)	0.04	1	1
■ behavior/neurological phenotype	MP:0005386	31.26% (146/467)	28.41% (3188/11223)	0.1	0.35	1
└ abnormal behavior	MP:0004924	31.26% (146/467)	28.41% (3188/11223)	0.1	0.412	1
├ abnormal cognition	MP:0014114	9.64% (45/467)	4.95% (556/11223)	3.376e-05	0.002	0.0106006
│└ abnormal learning/memory/conditioning	MP:0002063	9.64% (45/467)	4.95% (555/11223)	3.242e-05	0.002	0.0193547
│ ├ abnormal object recognition memory	MP:0001458	1.93% (9/467)	0.61% (68/11223)	0.003	0.069	1
│ │└ abnormal long term object recognition memory	MP:0002801	1.07% (5/467)	0.28% (31/11223)	0.014	0.227	1
│ ├ abnormal associative learning	MP:0002062	4.28% (20/467)	2.24% (251/11223)	0.006	0.113	1
│ │└ abnormal eye blink conditioning behavior	MP:0002807	0.64% (3/467)	0.05% (6/11223)	0.004	0.105	1
│ ├ abnormal temporal memory	MP:0001468	2.78% (13/467)	1.21% (136/11223)	0.007	0.119	1
│ │└ abnormal long term object recognition memory	MP:0002801	1.07% (5/467)	0.28% (31/11223)	0.014	0.227	1
│ ├ abnormal spatial reference memory	MP:0008414	1.5% (7/467)	0.56% (63/11223)	0.021	0.228	1
│ │└ abnormal short term spatial reference memory	MP:0008431	0.43% (2/467)	0.04% (4/11223)	0.021	0.294	1
│ ├ abnormal spatial learning	MP:0001463	3.43% (16/467)	1.93% (217/11223)	0.025	0.236	1
│ └ abnormal spatial working memory	MP:0008428	1.28% (6/467)	0.5% (56/11223)	0.037	0.252	1
├ seizures	MP:0002064	5.14% (24/467)	2.74% (307/11223)	0.004	0.05	1
│├ abnormal seizure response to inducing agent	MP:0009357	2.78% (13/467)	1.44% (162/11223)	0.023	0.208	1
││├ decreased susceptibility to induction of seizure by inducing agent	MP:0012348	1.07% (5/467)	0.2% (23/11223)	0.005	0.097	1
│││└ decreased susceptibility to pharmacologically induced seizures	MP:0002887	1.07% (5/467)	0.2% (23/11223)	0.005	0.121	1
││├ abnormal seizure response to pharmacological agent	MP:0000950	2.14% (10/467)	1.02% (114/11223)	0.027	0.236	1
│││└ decreased susceptibility to pharmacologically induced seizures	MP:0002887	1.07% (5/467)	0.2% (23/11223)	0.005	0.121	1
││└ environmentally induced seizures	MP:0009358	0.86% (4/467)	0.29% (33/11223)	0.059	0.313	1
││ └ audiogenic seizures	MP:0001496	0.64% (3/467)	0.15% (17/11223)	0.044	0.329	1
│└ convulsive seizures	MP:0000947	2.14% (10/467)	1.23% (138/11223)	0.073	0.354	1
│ └ audiogenic seizures	MP:0001496	0.64% (3/467)	0.15% (17/11223)	0.044	0.271	1
├ abnormal consumption behavior	MP:0002069	7.71% (36/467)	5.19% (583/11223)	0.015	0.143	1
│├ abnormal eating behavior	MP:0001431	7.07% (33/467)	4.45% (499/11223)	0.008	0.126	1
││├ abnormal suckling behavior	MP:0001436	2.78% (13/467)	0.86% (96/11223)	0.0003943	0.019	0.282713
││└ abnormal food intake	MP:0005449	4.28% (20/467)	3.42% (384/11223)	0.19	0.494	1
││ └ aphagia	MP:0001438	2.14% (10/467)	0.94% (105/11223)	0.017	0.262	1
││ └ absent gastric milk in neonates	MP:0009546	2.14% (10/467)	0.7% (78/11223)	0.003	0.073	1
│└ abnormal drinking behavior	MP:0001422	0.86% (4/467)	1.19% (134/11223)	0.807	0.983	1
│ ├ abnormal alcohol consumption	MP:0001425	0.64% (3/467)	0.29% (32/11223)	0.163	0.451	1
│ │└ decreased alcohol consumption	MP:0003546	0.64% (3/467)	0.13% (15/11223)	0.033	0.306	1
│ └ abnormal fluid intake	MP:0011947	0.86% (4/467)	1.0% (112/11223)	0.686	0.911	1
│ └ decreased fluid intake	MP:0011942	0.86% (4/467)	0.28% (31/11223)	0.05	0.339	1
│ └ decreased alcohol consumption	MP:0003546	0.64% (3/467)	0.13% (15/11223)	0.033	0.24	1
├ abnormal behavioral response to xenobiotic	MP:0009745	3.85% (18/467)	2.32% (260/11223)	0.03	0.219	1
│├ abnormal seizure response to pharmacological agent	MP:0000950	2.14% (10/467)	1.02% (114/11223)	0.027	0.224	1
││└ decreased susceptibility to pharmacologically induced seizures	MP:0002887	1.07% (5/467)	0.2% (23/11223)	0.005	0.097	1
│├ enhanced behavioral response to xenobiotic	MP:0009746	1.28% (6/467)	0.47% (53/11223)	0.03	0.233	1
││└ enhanced behavioral response to addictive substance	MP:0009749	0.86% (4/467)	0.29% (32/11223)	0.054	0.3	1
││ └ enhanced behavioral response to cocaine	MP:0009754	0.64% (3/467)	0.12% (14/11223)	0.028	0.296	1
│├ abnormal alcohol consumption	MP:0001425	0.64% (3/467)	0.29% (32/11223)	0.163	0.489	1
││└ decreased alcohol consumption	MP:0003546	0.64% (3/467)	0.13% (15/11223)	0.033	0.246	1
│└ abnormal behavioral response to addictive substance	MP:0009748	1.07% (5/467)	0.77% (86/11223)	0.299	0.661	1
│ ├ enhanced behavioral response to addictive substance	MP:0009749	0.86% (4/467)	0.29% (32/11223)	0.054	0.3	1
│ │└ enhanced behavioral response to cocaine	MP:0009754	0.64% (3/467)	0.12% (14/11223)	0.028	0.296	1
│ └ abnormal behavioral response to cocaine	MP:0020158	0.64% (3/467)	0.22% (25/11223)	0.099	0.374	1
│ └ enhanced behavioral response to cocaine	MP:0009754	0.64% (3/467)	0.12% (14/11223)	0.028	0.296	1
├ abnormal sensory capabilities/reflexes/nociception	MP:0002067	10.06% (47/467)	7.9% (887/11223)	0.058	0.319	1
│└ abnormal reflex	MP:0001961	8.99% (42/467)	6.4% (718/11223)	0.02	0.199	1
│ ├ abnormal startle reflex	MP:0001486	4.71% (22/467)	2.37% (266/11223)	0.003	0.069	1
│ │└ increased startle reflex	MP:0001488	2.14% (10/467)	0.75% (84/11223)	0.004	0.105	1
│ └ abnormal postural reflex	MP:0002980	2.14% (10/467)	1.05% (118/11223)	0.032	0.244	1
│ └ altered righting response	MP:0002862	2.14% (10/467)	1.01% (113/11223)	0.025	0.296	1
├ abnormal motor capabilities/coordination/movement	MP:0002066	23.13% (108/467)	20.66% (2319/11223)	0.111	0.471	1
│├ abnormal motor coordination/balance	MP:0001516	10.49% (49/467)	5.83% (654/11223)	9.285e-05	0.004	0.0554314
││├ ataxia	MP:0001393	5.14% (24/467)	1.89% (212/11223)	2.486e-05	0.002	0.0178246
││├ impaired coordination	MP:0001405	5.35% (25/467)	3.11% (349/11223)	0.008	0.133	1
││└ altered righting response	MP:0002862	2.14% (10/467)	1.01% (113/11223)	0.025	0.236	1
│├ abnormal involuntary movement	MP:0003492	11.35% (53/467)	7.79% (874/11223)	0.005	0.085	1
││├ tremors	MP:0000745	4.28% (20/467)	2.2% (247/11223)	0.005	0.097	1
││└ abnormal reflex	MP:0001961	8.99% (42/467)	6.4% (718/11223)	0.02	0.228	1
││ ├ abnormal startle reflex	MP:0001486	4.71% (22/467)	2.37% (266/11223)	0.003	0.086	1
││ │└ increased startle reflex	MP:0001488	2.14% (10/467)	0.75% (84/11223)	0.004	0.092	1
││ └ abnormal postural reflex	MP:0002980	2.14% (10/467)	1.05% (118/11223)	0.032	0.306	1
││ └ altered righting response	MP:0002862	2.14% (10/467)	1.01% (113/11223)	0.025	0.222	1
│├ abnormal voluntary movement	MP:0003491	18.42% (86/467)	14.58% (1636/11223)	0.015	0.172	1
││├ abnormal locomotor behavior	MP:0001392	17.56% (82/467)	13.94% (1564/11223)	0.018	0.215	1
│││├ abnormal locomotor coordination	MP:0003312	8.35% (39/467)	4.89% (549/11223)	0.001	0.039	0.631
││││└ ataxia	MP:0001393	5.14% (24/467)	1.89% (212/11223)	2.486e-05	0.002	0.010839
│││└ abnormal locomotor activation	MP:0003313	11.99% (56/467)	10.87% (1220/11223)	0.244	0.611	1
│││ └ hyperactivity	MP:0001399	6.42% (30/467)	4.0% (449/11223)	0.01	0.141	1
││└ abnormal stationary movement	MP:0001388	2.57% (12/467)	1.35% (152/11223)	0.032	0.244	1
││ └ abnormal tail movements	MP:0001391	1.07% (5/467)	0.17% (19/11223)	0.002	0.066	1
│├ abnormal posture	MP:0001504	3.21% (15/467)	1.77% (199/11223)	0.025	0.219	1
│└ stereotypic behavior	MP:0001408	2.57% (12/467)	1.4% (157/11223)	0.038	0.255	1
│ └ increased stereotypic behavior	MP:0001409	0.21% (1/467)	0.27% (30/11223)	0.718	1	1
│ └ increased horizontal stereotypic behavior	MP:0009848	0.21% (1/467)	0.0% (0/11223)	0.04	1	1
├ abnormal social/conspecific interaction	MP:0002557	3.43% (16/467)	2.6% (292/11223)	0.171	0.604	1
│└ abnormal parental behavior	MP:0002068	2.14% (10/467)	1.08% (121/11223)	0.037	0.255	1
│ └ abnormal maternal behavior	MP:0008779	1.93% (9/467)	0.86% (96/11223)	0.024	0.236	1
│ └ abnormal maternal nurturing	MP:0001386	1.93% (9/467)	0.78% (87/11223)	0.014	0.227	1
└ abnormal emotion/affect behavior	MP:0002572	5.57% (26/467)	4.8% (539/11223)	0.254	0.752	1
└ abnormal fear/anxiety-related behavior	MP:0002065	3.85% (18/467)	2.95% (331/11223)	0.161	0.489	1
└ abnormal fear-related response	MP:0003106	0.64% (3/467)	0.5% (56/11223)	0.421	0.72	1
└ slow extinction of fear memory	MP:0012318	0.21% (1/467)	0.0% (0/11223)	0.04	1	1
■ reproductive system phenotype	MP:0005389	19.49% (91/467)	17.44% (1957/11223)	0.141	0.431	1
├ abnormal reproductive system physiology	MP:0001919	17.13% (80/467)	13.59% (1525/11223)	0.02	0.14	1
│├ abnormal fertility/fecundity	MP:0002161	15.42% (72/467)	12.02% (1349/11223)	0.019	0.17	1
││└ delayed fertility	MP:0002683	0.43% (2/467)	0.12% (13/11223)	0.119	0.439	1
││ └ delayed female fertility	MP:0008976	0.43% (2/467)	0.06% (7/11223)	0.048	0.282	1
│└ abnormal female reproductive system physiology	MP:0003699	6.42% (30/467)	5.93% (665/11223)	0.356	0.849	1
│ ├ abnormal pregnancy	MP:0009661	1.71% (8/467)	1.27% (143/11223)	0.257	0.602	1
│ │└ abnormal embryo implantation	MP:0001727	1.28% (6/467)	0.5% (56/11223)	0.037	0.252	1
│ │ └ failure of embryo implantation	MP:0001728	0.86% (4/467)	0.23% (26/11223)	0.03	0.296	1
│ └ abnormal ovulation cycle	MP:0009344	1.07% (5/467)	0.86% (97/11223)	0.386	0.743	1
│ └ abnormal estrous cycle	MP:0001927	1.07% (5/467)	0.86% (97/11223)	0.386	0.697	1
│ ├ abnormal diestrus	MP:0009010	0.64% (3/467)	0.15% (17/11223)	0.044	0.329	1
│ │└ prolonged diestrus	MP:0009011	0.64% (3/467)	0.12% (13/11223)	0.024	0.222	1
│ └ abnormal estrus	MP:0009016	0.64% (3/467)	0.28% (31/11223)	0.153	0.502	1
│ └ short estrus	MP:0009018	0.43% (2/467)	0.03% (3/11223)	0.015	0.172	1
└ abnormal reproductive system morphology	MP:0002160	9.21% (43/467)	11.41% (1281/11223)	0.943	1	1
├ abnormal sex determination	MP:0002210	5.78% (27/467)	5.13% (576/11223)	0.296	0.779	1
│└ abnormal secondary sex determination	MP:0002212	1.28% (6/467)	0.53% (60/11223)	0.048	0.295	1
│ └ abnormal sexual maturation	MP:0001937	1.07% (5/467)	0.41% (46/11223)	0.052	0.3	1
│ └ delayed fertility	MP:0002683	0.43% (2/467)	0.12% (13/11223)	0.119	0.481	1
│ └ delayed female fertility	MP:0008976	0.43% (2/467)	0.06% (7/11223)	0.048	0.279	1
├ abnormal gametogenesis	MP:0001929	6.64% (31/467)	6.29% (706/11223)	0.409	0.896	1
│└ abnormal germ cell morphology	MP:0002208	6.0% (28/467)	5.52% (619/11223)	0.357	0.72	1
│ └ abnormal primordial germ cell morphology	MP:0008391	0.86% (4/467)	0.25% (28/11223)	0.037	0.252	1
├ abnormal female reproductive system morphology	MP:0001119	3.64% (17/467)	3.81% (428/11223)	0.611	1	1
│└ abnormal female genitalia morphology	MP:0009208	3.64% (17/467)	3.79% (425/11223)	0.6	0.874	1
│ └ abnormal internal female genitalia morphology	MP:0009209	3.64% (17/467)	3.72% (418/11223)	0.573	0.833	1
│ ├ abnormal ovary morphology	MP:0001126	2.57% (12/467)	2.59% (291/11223)	0.554	0.878	1
│ │└ abnormal ovary size	MP:0004853	1.28% (6/467)	1.44% (162/11223)	0.667	0.982	1
│ │ └ enlarged ovary	MP:0004832	0.43% (2/467)	0.12% (14/11223)	0.132	0.445	1
│ │ └ ovary hyperplasia	MP:0001128	0.43% (2/467)	0.04% (4/11223)	0.021	0.144	1
│ └ abnormal uterus morphology	MP:0001120	1.28% (6/467)	1.73% (194/11223)	0.816	0.997	1
│ └ abnormal endometrium morphology	MP:0004896	0.21% (1/467)	0.38% (43/11223)	0.834	1	1
│ └ absent endometrium	MP:0009224	0.21% (1/467)	0.0% (0/11223)	0.04	1	1
├ abnormal sex gland morphology	MP:0000653	6.85% (32/467)	8.29% (930/11223)	0.885	1	1
│├ abnormal female reproductive gland morphology	MP:0013324	2.57% (12/467)	2.78% (312/11223)	0.648	0.893	1
││└ abnormal ovary morphology	MP:0001126	2.57% (12/467)	2.59% (291/11223)	0.554	0.824	1
││ └ abnormal ovary size	MP:0004853	1.28% (6/467)	1.44% (162/11223)	0.667	0.948	1
││ └ enlarged ovary	MP:0004832	0.43% (2/467)	0.12% (14/11223)	0.132	0.453	1
││ └ ovary hyperplasia	MP:0001128	0.43% (2/467)	0.04% (4/11223)	0.021	0.19	1
│└ abnormal male reproductive gland morphology	MP:0013325	6.0% (28/467)	7.14% (801/11223)	0.85	0.986	1
│ └ abnormal testis morphology	MP:0001146	5.57% (26/467)	5.81% (652/11223)	0.616	0.86	1
│ └ abnormal seminiferous tubule morphology	MP:0002216	3.64% (17/467)	2.72% (305/11223)	0.147	0.493	1
│ ├ seminiferous tubule degeneration	MP:0001154	1.93% (9/467)	0.69% (77/11223)	0.007	0.131	1
│ └ abnormal seminiferous tubule epithelium morphology	MP:0011750	1.71% (8/467)	0.78% (88/11223)	0.038	0.244	1
│ └ abnormal Sertoli cell morphology	MP:0002784	1.28% (6/467)	0.57% (64/11223)	0.06	0.323	1
│ └ Sertoli cell hypoplasia	MP:0005250	0.43% (2/467)	0.05% (6/11223)	0.038	0.204	1
└ abnormal male reproductive system morphology	MP:0001145	6.21% (29/467)	7.71% (865/11223)	0.903	1	1
└ abnormal male genitalia morphology	MP:0009198	6.21% (29/467)	7.71% (865/11223)	0.903	0.998	1
└ abnormal internal male genitalia morphology	MP:0009205	6.21% (29/467)	7.55% (847/11223)	0.88	1	1
├ abnormal epididymis morphology	MP:0002631	1.5% (7/467)	1.4% (157/11223)	0.484	0.83	1
│└ absent epididymis	MP:0004727	0.43% (2/467)	0.05% (6/11223)	0.038	0.244	1
└ abnormal testis morphology	MP:0001146	5.57% (26/467)	5.81% (652/11223)	0.616	0.92	1
└ abnormal seminiferous tubule morphology	MP:0002216	3.64% (17/467)	2.72% (305/11223)	0.147	0.468	1
├ seminiferous tubule degeneration	MP:0001154	1.93% (9/467)	0.69% (77/11223)	0.007	0.109	1
└ abnormal seminiferous tubule epithelium morphology	MP:0011750	1.71% (8/467)	0.78% (88/11223)	0.038	0.26	1
└ abnormal Sertoli cell morphology	MP:0002784	1.28% (6/467)	0.57% (64/11223)	0.06	0.254	1
└ Sertoli cell hypoplasia	MP:0005250	0.43% (2/467)	0.05% (6/11223)	0.038	0.234	1
■ cardiovascular system phenotype	MP:0005385	23.77% (111/467)	21.67% (2432/11223)	0.154	0.431	1
├ abnormal cardiovascular system physiology	MP:0001544	13.92% (65/467)	12.52% (1405/11223)	0.204	0.676	1
│├ abnormal fetal cardiomyocyte physiology	MP:0011390	1.28% (6/467)	0.29% (33/11223)	0.004	0.05	1
││└ abnormal fetal cardiomyocyte proliferation	MP:0003567	1.28% (6/467)	0.27% (30/11223)	0.003	0.056	1
│├ abnormal myocardial fiber physiology	MP:0004215	1.93% (9/467)	0.88% (99/11223)	0.029	0.217	1
││└ abnormal cardiomyocyte apoptosis	MP:0003221	0.86% (4/467)	0.36% (40/11223)	0.098	0.41	1
││ └ decreased cardiomyocyte apoptosis	MP:0003223	0.43% (2/467)	0.04% (5/11223)	0.029	0.236	1
│├ altered response of heart to induced stress	MP:0004484	1.07% (5/467)	0.64% (72/11223)	0.194	0.641	1
││└ decreased response of heart to induced stress	MP:0004486	0.86% (4/467)	0.2% (22/11223)	0.019	0.199	1
│└ abnormal blood circulation	MP:0002128	4.93% (23/467)	5.32% (597/11223)	0.676	1	1
│ └ hemorrhage	MP:0001914	3.43% (16/467)	4.37% (491/11223)	0.867	0.988	1
│ └ internal hemorrhage	MP:0001634	2.14% (10/467)	2.44% (274/11223)	0.704	0.92	1
│ └ heart hemorrhage	MP:0009698	1.07% (5/467)	0.41% (46/11223)	0.052	0.349	1
│ └ hemopericardium	MP:0005244	1.07% (5/467)	0.37% (41/11223)	0.036	0.244	1
└ abnormal cardiovascular system morphology	MP:0002127	17.99% (84/467)	16.66% (1870/11223)	0.243	0.68	1
├ abnormal cardiovascular development	MP:0002925	8.14% (38/467)	6.24% (700/11223)	0.064	0.335	1
│├ abnormal cardiac outflow tract development	MP:0006126	2.14% (10/467)	1.07% (120/11223)	0.035	0.255	1
││└ absent cardiac outflow tract	MP:0014044	0.43% (2/467)	0.01% (1/11223)	0.005	1	1
│├ abnormal heart development	MP:0000267	4.07% (19/467)	2.67% (300/11223)	0.054	0.31	1
││├ abnormal sinus venosus morphology	MP:0003228	0.43% (2/467)	0.05% (6/11223)	0.038	0.252	1
││└ abnormal heart looping	MP:0000269	1.71% (8/467)	0.94% (106/11223)	0.086	0.361	1
││ └ abnormal direction of heart looping	MP:0004252	0.86% (4/467)	0.27% (30/11223)	0.045	0.329	1
│├ abnormal cardiac neural crest cell morphology	MP:0012747	0.21% (1/467)	0.02% (2/11223)	0.115	1	1
││└ decreased cardiac neural crest cell number	MP:0012749	0.21% (1/467)	0.0% (0/11223)	0.04	1	1
││ └ absent cardiac neural crest cells	MP:0012750	0.21% (1/467)	0.0% (0/11223)	0.04	1	1
│└ abnormal vascular development	MP:0000259	4.71% (22/467)	4.36% (489/11223)	0.389	0.747	1
│ └ abnormal angiogenesis	MP:0000260	4.28% (20/467)	3.12% (350/11223)	0.105	0.376	1
│ ├ abnormal artery development	MP:0003410	2.36% (11/467)	1.34% (150/11223)	0.058	0.359	1
│ │└ abnormal dorsal aorta morphology	MP:0004787	2.14% (10/467)	0.71% (80/11223)	0.003	0.073	1
│ └ abnormal vein development	MP:0003411	1.07% (5/467)	0.63% (71/11223)	0.187	0.557	1
│ └ abnormal cardinal vein morphology	MP:0004783	0.86% (4/467)	0.21% (24/11223)	0.024	0.222	1
│ └ abnormal anterior cardinal vein morphology	MP:0004784	0.64% (3/467)	0.08% (9/11223)	0.011	0.128	1
├ abnormal heart morphology	MP:0000266	14.13% (66/467)	12.14% (1363/11223)	0.114	0.471	1
│├ abnormal pericardial cavity morphology	MP:0012501	2.36% (11/467)	1.0% (112/11223)	0.01	0.139	1
││├ pericardial edema	MP:0001787	1.5% (7/467)	0.62% (70/11223)	0.034	0.251	1
││└ hemopericardium	MP:0005244	1.07% (5/467)	0.37% (41/11223)	0.036	0.252	1
│├ abnormal heart and great vessel attachment	MP:0010425	3.0% (14/467)	1.67% (187/11223)	0.031	0.237	1
││└ abnormal heart and great artery attachment	MP:0010426	3.0% (14/467)	1.65% (185/11223)	0.029	0.236	1
││ └ double outlet right ventricle	MP:0000284	1.71% (8/467)	1.19% (133/11223)	0.202	0.575	1
││ └ double outlet right ventricle, ventricular defect committed to aorta	MP:0011666	0.43% (2/467)	0.06% (7/11223)	0.048	0.279	1
│├ abnormal heart development	MP:0000267	4.07% (19/467)	2.67% (300/11223)	0.054	0.31	1
││├ abnormal sinus venosus morphology	MP:0003228	0.43% (2/467)	0.05% (6/11223)	0.038	0.252	1
││└ abnormal heart looping	MP:0000269	1.71% (8/467)	0.94% (106/11223)	0.086	0.361	1
││ └ abnormal direction of heart looping	MP:0004252	0.86% (4/467)	0.27% (30/11223)	0.045	0.329	1
│├ abnormal impulse conducting system morphology	MP:0004123	0.43% (2/467)	0.08% (9/11223)	0.069	0.348	1
││└ abnormal sinoatrial node morphology	MP:0004115	0.43% (2/467)	0.04% (5/11223)	0.029	0.236	1
│├ abnormal pericardium morphology	MP:0000288	2.78% (13/467)	1.8% (202/11223)	0.09	0.402	1
││└ pericardial effusion	MP:0005312	1.71% (8/467)	0.86% (96/11223)	0.056	0.309	1
││ └ hemopericardium	MP:0005244	1.07% (5/467)	0.37% (41/11223)	0.036	0.316	1
│├ abnormal heart layer morphology	MP:0010545	4.07% (19/467)	3.26% (366/11223)	0.201	0.545	1
││├ abnormal endocardium morphology	MP:0003974	0.86% (4/467)	0.23% (26/11223)	0.03	0.236	1
││└ abnormal myocardium layer morphology	MP:0005329	3.85% (18/467)	3.21% (360/11223)	0.254	0.573	1
││ └ myocardium hypoplasia	MP:0010500	1.5% (7/467)	0.67% (75/11223)	0.045	0.329	1
│├ abnormal heart ventricle morphology	MP:0005294	6.0% (28/467)	5.18% (581/11223)	0.245	0.583	1
││├ abnormal heart ventricle wall thickness	MP:0020135	2.14% (10/467)	1.16% (130/11223)	0.054	0.3	1
│││└ thin ventricular wall	MP:0000280	1.93% (9/467)	0.81% (91/11223)	0.018	0.27	1
││└ abnormal heart right ventricle morphology	MP:0003920	1.28% (6/467)	1.35% (152/11223)	0.608	0.86	1
││ ├ absent heart right ventricle	MP:0003872	0.43% (2/467)	0.04% (4/11223)	0.021	0.294	1
││ └ heart right ventricle degeneration	MP:0005648	0.21% (1/467)	0.0% (0/11223)	0.04	1	1
│├ dilated heart	MP:0004937	1.5% (7/467)	1.44% (162/11223)	0.516	0.836	1
││└ dilated heart atrium	MP:0003140	0.43% (2/467)	0.37% (42/11223)	0.53	0.809	1
││ └ dilated heart right atrium	MP:0004062	0.43% (2/467)	0.06% (7/11223)	0.048	0.329	1
│├ abnormal heart atrium morphology	MP:0003105	1.71% (8/467)	1.83% (205/11223)	0.621	0.874	1
││├ abnormal heart right atrium morphology	MP:0003922	0.86% (4/467)	0.35% (39/11223)	0.091	0.368	1
│││├ abnormal sinoatrial node morphology	MP:0004115	0.43% (2/467)	0.04% (5/11223)	0.029	0.296	1
│││└ dilated heart right atrium	MP:0004062	0.43% (2/467)	0.06% (7/11223)	0.048	0.329	1
││└ dilated heart atrium	MP:0003140	0.43% (2/467)	0.37% (42/11223)	0.53	0.809	1
││ └ dilated heart right atrium	MP:0004062	0.43% (2/467)	0.06% (7/11223)	0.048	0.329	1
│└ abnormal heart size	MP:0005406	4.93% (23/467)	6.5% (730/11223)	0.932	1	1
│ └ small heart	MP:0002188	3.0% (14/467)	1.88% (211/11223)	0.067	0.328	1
│ └ heart hypoplasia	MP:0002740	1.5% (7/467)	0.77% (86/11223)	0.078	0.416	1
│ └ myocardium hypoplasia	MP:0010500	1.5% (7/467)	0.67% (75/11223)	0.045	0.276	1
├ abnormal cardiac muscle tissue morphology	MP:0010630	4.28% (20/467)	3.68% (413/11223)	0.283	0.773	1
│├ abnormal impulse conducting system morphology	MP:0004123	0.43% (2/467)	0.08% (9/11223)	0.069	0.348	1
││└ abnormal sinoatrial node morphology	MP:0004115	0.43% (2/467)	0.04% (5/11223)	0.029	0.236	1
│└ abnormal myocardium layer morphology	MP:0005329	3.85% (18/467)	3.21% (360/11223)	0.254	0.599	1
│ └ myocardium hypoplasia	MP:0010500	1.5% (7/467)	0.67% (75/11223)	0.045	0.271	1
└ abnormal blood vessel morphology	MP:0001614	8.99% (42/467)	9.69% (1087/11223)	0.713	1	1
├ abnormal artery morphology	MP:0002191	4.5% (21/467)	3.86% (433/11223)	0.274	0.622	1
│└ abnormal artery development	MP:0003410	2.36% (11/467)	1.34% (150/11223)	0.058	0.31	1
│ └ abnormal dorsal aorta morphology	MP:0004787	2.14% (10/467)	0.71% (80/11223)	0.003	0.086	1
├ abnormal vascular development	MP:0000259	4.71% (22/467)	4.36% (489/11223)	0.389	0.747	1
│└ abnormal angiogenesis	MP:0000260	4.28% (20/467)	3.12% (350/11223)	0.105	0.376	1
│ ├ abnormal artery development	MP:0003410	2.36% (11/467)	1.34% (150/11223)	0.058	0.359	1
│ │└ abnormal dorsal aorta morphology	MP:0004787	2.14% (10/467)	0.71% (80/11223)	0.003	0.073	1
│ └ abnormal vein development	MP:0003411	1.07% (5/467)	0.63% (71/11223)	0.187	0.557	1
│ └ abnormal cardinal vein morphology	MP:0004783	0.86% (4/467)	0.21% (24/11223)	0.024	0.222	1
│ └ abnormal anterior cardinal vein morphology	MP:0004784	0.64% (3/467)	0.08% (9/11223)	0.011	0.128	1
├ abnormal vein morphology	MP:0002725	1.5% (7/467)	1.53% (172/11223)	0.577	0.865	1
│└ abnormal vein development	MP:0003411	1.07% (5/467)	0.63% (71/11223)	0.187	0.493	1
│ └ abnormal cardinal vein morphology	MP:0004783	0.86% (4/467)	0.21% (24/11223)	0.024	0.296	1
│ └ abnormal anterior cardinal vein morphology	MP:0004784	0.64% (3/467)	0.08% (9/11223)	0.011	0.145	1
└ abnormal capillary morphology	MP:0003658	0.64% (3/467)	0.77% (86/11223)	0.696	0.925	1
└ abnormal capillary branching pattern	MP:0020327	0.43% (2/467)	0.02% (2/11223)	0.009	0.137	1
■ hearing/vestibular/ear phenotype	MP:0005377	6.64% (31/467)	5.69% (639/11223)	0.22	0.56	1
├ abnormal ear morphology	MP:0002102	4.71% (22/467)	3.67% (412/11223)	0.149	0.549	1
│├ abnormal auditory bulla morphology	MP:0030160	0.43% (2/467)	0.01% (1/11223)	0.005	1	1
││└ absent auditory bulla	MP:0030161	0.21% (1/467)	0.0% (0/11223)	0.04	1	1
│├ abnormal ear development	MP:0003938	1.28% (6/467)	0.46% (52/11223)	0.028	0.214	1
││├ abnormal inner ear development	MP:0011238	0.43% (2/467)	0.05% (6/11223)	0.038	0.255	1
│││└ delayed inner ear development	MP:0004664	0.43% (2/467)	0.05% (6/11223)	0.038	0.252	1
││└ abnormal otic vesicle morphology	MP:0009806	0.43% (2/467)	0.3% (34/11223)	0.425	0.78	1
││ └ increased otic epithelial cell apoptosis	MP:0008063	0.21% (1/467)	0.0% (0/11223)	0.04	1	1
│├ abnormal outer ear morphology	MP:0002177	1.71% (8/467)	0.86% (97/11223)	0.059	0.319	1
││└ abnormal ear position	MP:0000023	0.86% (4/467)	0.21% (24/11223)	0.024	0.214	1
│├ abnormal inner ear morphology	MP:0000026	2.78% (13/467)	2.37% (266/11223)	0.324	0.814	1
││├ abnormal inner ear development	MP:0011238	0.43% (2/467)	0.05% (6/11223)	0.038	0.255	1
│││└ delayed inner ear development	MP:0004664	0.43% (2/467)	0.05% (6/11223)	0.038	0.252	1
││├ abnormal hair cell morphology	MP:0000045	2.36% (11/467)	1.6% (180/11223)	0.143	0.472	1
│││└ abnormal cochlear hair cell morphology	MP:0002622	2.14% (10/467)	1.53% (172/11223)	0.193	0.494	1
│││ ├ cochlear hair cell degeneration	MP:0004362	1.5% (7/467)	0.75% (84/11223)	0.071	0.4	1
│││ │└ cochlear outer hair cell degeneration	MP:0004404	1.5% (7/467)	0.6% (67/11223)	0.028	0.222	1
│││ ├ abnormal cochlear hair cell number	MP:0004406	1.07% (5/467)	0.51% (57/11223)	0.101	0.443	1
│││ │└ decreased cochlear hair cell number	MP:0004408	0.86% (4/467)	0.41% (46/11223)	0.138	0.462	1
│││ │ └ decreased cochlear outer hair cell number	MP:0004402	0.86% (4/467)	0.28% (31/11223)	0.05	0.311	1
│││ └ abnormal cochlear outer hair cell morphology	MP:0004399	1.93% (9/467)	1.19% (134/11223)	0.119	0.481	1
│││ ├ short cochlear outer hair cells	MP:0004466	0.43% (2/467)	0.04% (4/11223)	0.021	0.208	1
│││ ├ cochlear outer hair cell degeneration	MP:0004404	1.5% (7/467)	0.6% (67/11223)	0.028	0.222	1
│││ └ abnormal cochlear outer hair cell number	MP:0004400	1.07% (5/467)	0.37% (42/11223)	0.039	0.246	1
│││ └ decreased cochlear outer hair cell number	MP:0004402	0.86% (4/467)	0.28% (31/11223)	0.05	0.311	1
││├ abnormal cochlea morphology	MP:0000031	2.36% (11/467)	2.0% (224/11223)	0.338	0.708	1
│││├ abnormal spiral limbus morphology	MP:0004287	0.43% (2/467)	0.05% (6/11223)	0.038	0.252	1
│││├ abnormal cochlear sensory epithelium morphology	MP:0003308	2.14% (10/467)	1.59% (179/11223)	0.224	0.534	1
││││└ abnormal cochlear hair cell morphology	MP:0002622	2.14% (10/467)	1.53% (172/11223)	0.193	0.569	1
││││ ├ cochlear hair cell degeneration	MP:0004362	1.5% (7/467)	0.75% (84/11223)	0.071	0.36	1
││││ │└ cochlear outer hair cell degeneration	MP:0004404	1.5% (7/467)	0.6% (67/11223)	0.028	0.24	1
││││ ├ abnormal cochlear hair cell number	MP:0004406	1.07% (5/467)	0.51% (57/11223)	0.101	0.397	1
││││ │└ decreased cochlear hair cell number	MP:0004408	0.86% (4/467)	0.41% (46/11223)	0.138	0.455	1
││││ │ └ decreased cochlear outer hair cell number	MP:0004402	0.86% (4/467)	0.28% (31/11223)	0.05	0.249	1
││││ └ abnormal cochlear outer hair cell morphology	MP:0004399	1.93% (9/467)	1.19% (134/11223)	0.119	0.422	1
││││ ├ short cochlear outer hair cells	MP:0004466	0.43% (2/467)	0.04% (4/11223)	0.021	0.19	1
││││ ├ cochlear outer hair cell degeneration	MP:0004404	1.5% (7/467)	0.6% (67/11223)	0.028	0.24	1
││││ └ abnormal cochlear outer hair cell number	MP:0004400	1.07% (5/467)	0.37% (42/11223)	0.039	0.26	1
││││ └ decreased cochlear outer hair cell number	MP:0004402	0.86% (4/467)	0.28% (31/11223)	0.05	0.249	1
│││└ abnormal scala media morphology	MP:0003169	2.14% (10/467)	1.86% (209/11223)	0.378	0.692	1
│││ ├ abnormal spiral ligament morphology	MP:0004288	0.64% (3/467)	0.14% (16/11223)	0.038	0.316	1
│││ └ abnormal organ of Corti morphology	MP:0000042	2.14% (10/467)	1.57% (176/11223)	0.211	0.584	1
│││ ├ abnormal organ of Corti supporting cell morphology	MP:0004300	1.07% (5/467)	0.25% (28/11223)	0.009	0.131	1
│││ │└ degeneration of organ of Corti supporting cells	MP:0004465	0.64% (3/467)	0.06% (7/11223)	0.006	0.105	1
│││ └ abnormal cochlear hair cell morphology	MP:0002622	2.14% (10/467)	1.53% (172/11223)	0.193	0.529	1
│││ ├ cochlear hair cell degeneration	MP:0004362	1.5% (7/467)	0.75% (84/11223)	0.071	0.355	1
│││ │└ cochlear outer hair cell degeneration	MP:0004404	1.5% (7/467)	0.6% (67/11223)	0.028	0.18	1
│││ ├ abnormal cochlear hair cell number	MP:0004406	1.07% (5/467)	0.51% (57/11223)	0.101	0.41	1
│││ │└ decreased cochlear hair cell number	MP:0004408	0.86% (4/467)	0.41% (46/11223)	0.138	0.458	1
│││ │ └ decreased cochlear outer hair cell number	MP:0004402	0.86% (4/467)	0.28% (31/11223)	0.05	0.258	1
│││ └ abnormal cochlear outer hair cell morphology	MP:0004399	1.93% (9/467)	1.19% (134/11223)	0.119	0.422	1
│││ ├ short cochlear outer hair cells	MP:0004466	0.43% (2/467)	0.04% (4/11223)	0.021	0.144	1
│││ ├ cochlear outer hair cell degeneration	MP:0004404	1.5% (7/467)	0.6% (67/11223)	0.028	0.18	1
│││ └ abnormal cochlear outer hair cell number	MP:0004400	1.07% (5/467)	0.37% (42/11223)	0.039	0.204	1
│││ └ decreased cochlear outer hair cell number	MP:0004402	0.86% (4/467)	0.28% (31/11223)	0.05	0.258	1
││└ abnormal membranous labyrinth morphology	MP:0000035	2.36% (11/467)	2.09% (235/11223)	0.395	0.756	1
││ └ abnormal cochlear labyrinth morphology	MP:0004426	2.14% (10/467)	1.86% (209/11223)	0.378	0.692	1
││ └ abnormal scala media morphology	MP:0003169	2.14% (10/467)	1.86% (209/11223)	0.378	0.753	1
││ ├ abnormal spiral ligament morphology	MP:0004288	0.64% (3/467)	0.14% (16/11223)	0.038	0.244	1
││ └ abnormal organ of Corti morphology	MP:0000042	2.14% (10/467)	1.57% (176/11223)	0.211	0.558	1
││ ├ abnormal organ of Corti supporting cell morphology	MP:0004300	1.07% (5/467)	0.25% (28/11223)	0.009	0.11	1
││ │└ degeneration of organ of Corti supporting cells	MP:0004465	0.64% (3/467)	0.06% (7/11223)	0.006	0.08	1
││ └ abnormal cochlear hair cell morphology	MP:0002622	2.14% (10/467)	1.53% (172/11223)	0.193	0.551	1
││ ├ cochlear hair cell degeneration	MP:0004362	1.5% (7/467)	0.75% (84/11223)	0.071	0.294	1
││ │└ cochlear outer hair cell degeneration	MP:0004404	1.5% (7/467)	0.6% (67/11223)	0.028	0.21	1
││ ├ abnormal cochlear hair cell number	MP:0004406	1.07% (5/467)	0.51% (57/11223)	0.101	0.372	1
││ │└ decreased cochlear hair cell number	MP:0004408	0.86% (4/467)	0.41% (46/11223)	0.138	0.487	1
││ │ └ decreased cochlear outer hair cell number	MP:0004402	0.86% (4/467)	0.28% (31/11223)	0.05	0.253	1
││ └ abnormal cochlear outer hair cell morphology	MP:0004399	1.93% (9/467)	1.19% (134/11223)	0.119	0.408	1
││ ├ short cochlear outer hair cells	MP:0004466	0.43% (2/467)	0.04% (4/11223)	0.021	0.18	1
││ ├ cochlear outer hair cell degeneration	MP:0004404	1.5% (7/467)	0.6% (67/11223)	0.028	0.21	1
││ └ abnormal cochlear outer hair cell number	MP:0004400	1.07% (5/467)	0.37% (42/11223)	0.039	0.234	1
││ └ decreased cochlear outer hair cell number	MP:0004402	0.86% (4/467)	0.28% (31/11223)	0.05	0.253	1
│└ abnormal middle ear morphology	MP:0000049	0.86% (4/467)	0.75% (84/11223)	0.469	0.952	1
│ ├ abnormal tympanic cavity morphology	MP:0030154	0.43% (2/467)	0.05% (6/11223)	0.038	0.255	1
│ │└ absent tympanic cavity	MP:0030155	0.21% (1/467)	0.0% (0/11223)	0.04	1	1
│ ├ abnormal round window morphology	MP:0004480	0.21% (1/467)	0.0% (0/11223)	0.04	1	1
│ │├ small round window	MP:0030411	0.21% (1/467)	0.0% (0/11223)	0.04	1	1
│ │└ absent round window	MP:0030412	0.21% (1/467)	0.0% (0/11223)	0.04	1	1
│ └ abnormal middle ear ossicle morphology	MP:0005105	0.64% (3/467)	0.56% (63/11223)	0.494	0.82	1
│ └ abnormal malleus morphology	MP:0000029	0.43% (2/467)	0.23% (26/11223)	0.309	0.621	1
│ └ abnormal malleus processus brevis morphology	MP:0010324	0.43% (2/467)	0.04% (5/11223)	0.029	0.296	1
│ └ absent malleus processus brevis	MP:0003110	0.43% (2/467)	0.03% (3/11223)	0.015	0.172	1
└ abnormal ear physiology	MP:0003878	4.07% (19/467)	3.77% (423/11223)	0.404	0.943	1
├ abnormal hair cell physiology	MP:0003879	1.07% (5/467)	0.33% (37/11223)	0.025	0.207	1
│└ abnormal cochlear hair cell physiology	MP:0004432	1.07% (5/467)	0.27% (30/11223)	0.012	0.156	1
│ ├ abnormal cochlear inner hair cell physiology	MP:0004433	0.64% (3/467)	0.09% (10/11223)	0.013	0.166	1
│ └ abnormal cochlear outer hair cell physiology	MP:0004434	0.64% (3/467)	0.18% (20/11223)	0.062	0.322	1
│ ├ abnormal cochlear outer hair cell electromotility	MP:0004435	0.43% (2/467)	0.0% (0/11223)	0.002	1	1
│ │├ decreased cochlear outer hair cell electromotility	MP:0004437	0.43% (2/467)	0.0% (0/11223)	0.002	1	1
│ │└ absent cochlear outer hair cell electromotility	MP:0004436	0.21% (1/467)	0.0% (0/11223)	0.04	1	1
│ └ abnormal cochlear microphonics	MP:0004412	0.43% (2/467)	0.12% (13/11223)	0.119	0.481	1
│ └ decreased cochlear microphonics	MP:0004414	0.43% (2/467)	0.04% (4/11223)	0.021	0.208	1
├ abnormal vestibular system physiology	MP:0004742	0.64% (3/467)	0.4% (45/11223)	0.3	0.779	1
│└ abnormal linear vestibular evoked potential	MP:0004812	0.43% (2/467)	0.26% (29/11223)	0.353	0.72	1
│ └ reduced linear vestibular evoked potential	MP:0004814	0.43% (2/467)	0.06% (7/11223)	0.048	0.282	1
└ abnormal hearing physiology	MP:0001963	3.64% (17/467)	3.47% (389/11223)	0.457	0.944	1
├ abnormal otoacoustic response	MP:0006336	1.07% (5/467)	0.52% (58/11223)	0.106	0.419	1
│└ abnormal distortion product otoacoustic emission	MP:0004736	1.07% (5/467)	0.51% (57/11223)	0.101	0.375	1
│ └ absent distortion product otoacoustic emissions	MP:0004737	0.86% (4/467)	0.27% (30/11223)	0.045	0.329	1
└ abnormal hearing electrophysiology	MP:0006335	3.21% (15/467)	2.98% (335/11223)	0.428	0.78	1
├ abnormal cochlear nerve fiber response	MP:0006324	0.21% (1/467)	0.0% (0/11223)	0.04	1	1
└ abnormal cochlear potential	MP:0006332	0.43% (2/467)	0.12% (14/11223)	0.132	0.423	1
└ abnormal cochlear microphonics	MP:0004412	0.43% (2/467)	0.12% (13/11223)	0.119	0.481	1
└ decreased cochlear microphonics	MP:0004414	0.43% (2/467)	0.04% (4/11223)	0.021	0.208	1
■ skeleton phenotype	MP:0005390	17.56% (82/467)	17.76% (1993/11223)	0.564	1	1
└ abnormal skeleton morphology	MP:0005508	17.13% (80/467)	16.77% (1882/11223)	0.439	0.967	1
├ abnormal ligament morphology	MP:0005504	0.64% (3/467)	0.37% (41/11223)	0.257	0.752	1
│└ abnormal spiral ligament morphology	MP:0004288	0.64% (3/467)	0.14% (16/11223)	0.038	0.255	1
├ abnormal axial skeleton morphology	MP:0002114	10.28% (48/467)	9.29% (1043/11223)	0.259	0.752	1
│├ abnormal craniofacial bone morphology	MP:0002116	7.49% (35/467)	5.62% (631/11223)	0.058	0.315	1
││├ abnormal cranium morphology	MP:0000438	7.49% (35/467)	5.51% (618/11223)	0.046	0.275	1
│││├ abnormal cranium size	MP:0010031	1.71% (8/467)	0.6% (67/11223)	0.01	0.191	1
││││├ decreased cranium width	MP:0008526	0.43% (2/467)	0.05% (6/11223)	0.038	0.244	1
││││└ increased cranium height	MP:0011861	0.21% (1/467)	0.0% (0/11223)	0.04	1	1
│││├ abnormal neurocranium morphology	MP:0000074	3.21% (15/467)	2.03% (228/11223)	0.063	0.377	1
││││├ abnormal fontanelle morphology	MP:0000084	0.86% (4/467)	0.13% (15/11223)	0.006	0.125	1
│││││└ small fontanelles	MP:0030389	0.21% (1/467)	0.0% (0/11223)	0.04	1	1
││││├ overlapping parietal bones	MP:0000082	0.21% (1/467)	0.0% (0/11223)	0.04	1	1
││││├ abnormal temporal bone morphology	MP:0005272	0.86% (4/467)	0.43% (48/11223)	0.153	0.48	1
│││││└ abnormal temporal bone petrous part morphology	MP:0030319	0.43% (2/467)	0.21% (24/11223)	0.279	0.646	1
│││││ ├ abnormal round window morphology	MP:0004480	0.21% (1/467)	0.0% (0/11223)	0.04	1	1
│││││ │├ small round window	MP:0030411	0.21% (1/467)	0.0% (0/11223)	0.04	1	1
│││││ │└ absent round window	MP:0030412	0.21% (1/467)	0.0% (0/11223)	0.04	1	1
│││││ └ absent temporal bone petrous part	MP:0030329	0.21% (1/467)	0.0% (0/11223)	0.04	1	1
││││├ abnormal parietal bone morphology	MP:0000109	0.64% (3/467)	0.48% (54/11223)	0.4	0.772	1
│││││└ overlapping parietal bones	MP:0000082	0.21% (1/467)	0.0% (0/11223)	0.04	1	1
││││└ abnormal occipital bone morphology	MP:0005269	0.86% (4/467)	0.73% (82/11223)	0.452	0.806	1
││││ └ abnormal exoccipital bone morphology	MP:0000080	0.21% (1/467)	0.12% (13/11223)	0.435	1	1
││││ └ absent exoccipital bone	MP:0030028	0.21% (1/467)	0.0% (0/11223)	0.04	1	1
│││├ abnormal basicranium morphology	MP:0010029	1.5% (7/467)	0.89% (100/11223)	0.136	0.485	1
││││└ abnormal temporal bone petrous part morphology	MP:0030319	0.43% (2/467)	0.21% (24/11223)	0.279	0.611	1
││││ ├ abnormal round window morphology	MP:0004480	0.21% (1/467)	0.0% (0/11223)	0.04	1	1
││││ │├ small round window	MP:0030411	0.21% (1/467)	0.0% (0/11223)	0.04	1	1
││││ │└ absent round window	MP:0030412	0.21% (1/467)	0.0% (0/11223)	0.04	1	1
││││ └ absent temporal bone petrous part	MP:0030329	0.21% (1/467)	0.0% (0/11223)	0.04	1	1
│││├ abnormal viscerocranium morphology	MP:0005274	4.71% (22/467)	3.87% (434/11223)	0.208	0.581	1
││││├ abnormal jaw morphology	MP:0000454	4.5% (21/467)	3.41% (383/11223)	0.131	0.453	1
│││││├ abnormal maxilla morphology	MP:0000455	2.14% (10/467)	0.91% (102/11223)	0.014	0.157	1
││││││├ absent maxilla	MP:0004539	0.43% (2/467)	0.05% (6/11223)	0.038	0.204	1
││││││└ abnormal premaxilla morphology	MP:0002820	0.64% (3/467)	0.21% (24/11223)	0.091	0.356	1
││││││ └ absent premaxilla	MP:0000090	0.43% (2/467)	0.0% (0/11223)	0.002	1	1
│││││└ agnathia	MP:0030268	0.43% (2/467)	0.19% (21/11223)	0.234	0.598	1
│││││ └ absent maxilla	MP:0004539	0.43% (2/467)	0.05% (6/11223)	0.038	0.204	1
││││├ absent facial bone	MP:0030385	0.64% (3/467)	0.33% (37/11223)	0.214	0.558	1
│││││├ absent premaxilla	MP:0000090	0.43% (2/467)	0.0% (0/11223)	0.002	1	1
│││││└ absent maxilla	MP:0004539	0.43% (2/467)	0.05% (6/11223)	0.038	0.26	1
││││└ abnormal hyoid bone morphology	MP:0003056	0.43% (2/467)	0.27% (30/11223)	0.368	0.733	1
││││ └ abnormal hyoid bone greater horn morphology	MP:0009913	0.21% (1/467)	0.04% (5/11223)	0.217	1	1
││││ └ absent hyoid bone greater horns	MP:0009916	0.21% (1/467)	0.0% (0/11223)	0.04	1	1
│││└ abnormal cranial foramen morphology	MP:0030310	0.43% (2/467)	0.21% (24/11223)	0.279	0.643	1
│││ └ abnormal round window morphology	MP:0004480	0.21% (1/467)	0.0% (0/11223)	0.04	1	1
│││ ├ small round window	MP:0030411	0.21% (1/467)	0.0% (0/11223)	0.04	1	1
│││ └ absent round window	MP:0030412	0.21% (1/467)	0.0% (0/11223)	0.04	1	1
││└ abnormal middle ear ossicle morphology	MP:0005105	0.64% (3/467)	0.56% (63/11223)	0.494	0.772	1
││ └ abnormal malleus morphology	MP:0000029	0.43% (2/467)	0.23% (26/11223)	0.309	0.681	1
││ └ abnormal malleus processus brevis morphology	MP:0010324	0.43% (2/467)	0.04% (5/11223)	0.029	0.222	1
││ └ absent malleus processus brevis	MP:0003110	0.43% (2/467)	0.03% (3/11223)	0.015	0.162	1
│├ abnormal thoracic cage morphology	MP:0004624	3.64% (17/467)	3.04% (341/11223)	0.265	0.611	1
││└ abnormal sternum morphology	MP:0000157	2.14% (10/467)	1.48% (166/11223)	0.167	0.461	1
││ ├ sternum hypoplasia	MP:0004323	0.21% (1/467)	0.0% (0/11223)	0.04	1	1
││ ├ abnormal sternebra morphology	MP:0004322	0.86% (4/467)	0.37% (41/11223)	0.104	0.453	1
││ │└ abnormal sternebra number	MP:0012282	0.43% (2/467)	0.09% (10/11223)	0.081	0.364	1
││ │ └ increased sternebra number	MP:0012284	0.43% (2/467)	0.04% (4/11223)	0.021	0.19	1
││ └ abnormal xiphoid process morphology	MP:0000159	0.64% (3/467)	0.35% (39/11223)	0.235	0.603	1
││ └ xiphoid process foramen	MP:0004679	0.43% (2/467)	0.02% (2/11223)	0.009	0.131	1
│└ abnormal vertebral column morphology	MP:0004703	4.93% (23/467)	5.3% (595/11223)	0.67	0.912	1
│ ├ abnormal intervertebral disk morphology	MP:0004173	0.64% (3/467)	0.5% (56/11223)	0.421	0.72	1
│ │└ abnormal laryngeal cartilage morphology	MP:0002256	0.64% (3/467)	0.22% (25/11223)	0.099	0.443	1
│ │ └ abnormal cricoid cartilage morphology	MP:0002258	0.43% (2/467)	0.11% (12/11223)	0.106	0.405	1
│ │ └ cricoid and tracheal cartilage fusion	MP:0009438	0.21% (1/467)	0.0% (0/11223)	0.04	1	1
│ └ abnormal vertebrae morphology	MP:0000137	3.21% (15/467)	3.67% (412/11223)	0.733	0.934	1
│ ├ vertebral transformation	MP:0003036	1.71% (8/467)	0.72% (81/11223)	0.026	0.296	1
│ └ abnormal presacral vertebrae morphology	MP:0000459	2.14% (10/467)	1.63% (183/11223)	0.244	0.611	1
│ └ abnormal cervical vertebrae morphology	MP:0003048	1.5% (7/467)	0.95% (107/11223)	0.171	0.504	1
│ └ abnormal cervical axis morphology	MP:0004608	0.86% (4/467)	0.3% (34/11223)	0.064	0.338	1
│ └ abnormal odontoid process morphology	MP:0004659	0.64% (3/467)	0.13% (15/11223)	0.033	0.199	1
├ abnormal cartilage morphology	MP:0000163	3.0% (14/467)	2.48% (278/11223)	0.279	0.768	1
│├ abnormal intervertebral disk morphology	MP:0004173	0.64% (3/467)	0.5% (56/11223)	0.421	0.78	1
││└ abnormal laryngeal cartilage morphology	MP:0002256	0.64% (3/467)	0.22% (25/11223)	0.099	0.374	1
││ └ abnormal cricoid cartilage morphology	MP:0002258	0.43% (2/467)	0.11% (12/11223)	0.106	0.458	1
││ └ cricoid and tracheal cartilage fusion	MP:0009438	0.21% (1/467)	0.0% (0/11223)	0.04	1	1
│└ abnormal tracheal cartilage morphology	MP:0003120	0.21% (1/467)	0.2% (23/11223)	0.624	1	1
│ └ cricoid and tracheal cartilage fusion	MP:0009438	0.21% (1/467)	0.0% (0/11223)	0.04	1	1
├ abnormal joint morphology	MP:0002932	3.43% (16/467)	2.97% (333/11223)	0.321	0.813	1
│├ abnormal fibrous joint morphology	MP:0030878	1.28% (6/467)	0.98% (110/11223)	0.318	0.685	1
││└ abnormal symphysis morphology	MP:0030877	0.64% (3/467)	0.54% (61/11223)	0.474	0.764	1
││ └ abnormal intervertebral disk morphology	MP:0004173	0.64% (3/467)	0.5% (56/11223)	0.421	0.782	1
││ └ abnormal laryngeal cartilage morphology	MP:0002256	0.64% (3/467)	0.22% (25/11223)	0.099	0.392	1
││ └ abnormal cricoid cartilage morphology	MP:0002258	0.43% (2/467)	0.11% (12/11223)	0.106	0.418	1
││ └ cricoid and tracheal cartilage fusion	MP:0009438	0.21% (1/467)	0.0% (0/11223)	0.04	1	1
│└ abnormal cartilaginous joint morphology	MP:0030875	0.64% (3/467)	0.61% (69/11223)	0.553	0.85	1
│ └ abnormal symphysis morphology	MP:0030877	0.64% (3/467)	0.54% (61/11223)	0.474	0.764	1
│ └ abnormal intervertebral disk morphology	MP:0004173	0.64% (3/467)	0.5% (56/11223)	0.421	0.782	1
│ └ abnormal laryngeal cartilage morphology	MP:0002256	0.64% (3/467)	0.22% (25/11223)	0.099	0.392	1
│ └ abnormal cricoid cartilage morphology	MP:0002258	0.43% (2/467)	0.11% (12/11223)	0.106	0.418	1
│ └ cricoid and tracheal cartilage fusion	MP:0009438	0.21% (1/467)	0.0% (0/11223)	0.04	1	1
├ abnormal appendicular skeleton morphology	MP:0009250	5.78% (27/467)	5.65% (634/11223)	0.481	0.954	1
│├ abnormal pectoral girdle bone morphology	MP:0004508	3.21% (15/467)	1.79% (201/11223)	0.027	0.224	1
││├ abnormal clavicle morphology	MP:0005298	0.86% (4/467)	0.22% (25/11223)	0.027	0.236	1
││└ abnormal sternum morphology	MP:0000157	2.14% (10/467)	1.48% (166/11223)	0.167	0.461	1
││ ├ sternum hypoplasia	MP:0004323	0.21% (1/467)	0.0% (0/11223)	0.04	1	1
││ ├ abnormal sternebra morphology	MP:0004322	0.86% (4/467)	0.37% (41/11223)	0.104	0.453	1
││ │└ abnormal sternebra number	MP:0012282	0.43% (2/467)	0.09% (10/11223)	0.081	0.364	1
││ │ └ increased sternebra number	MP:0012284	0.43% (2/467)	0.04% (4/11223)	0.021	0.19	1
││ └ abnormal xiphoid process morphology	MP:0000159	0.64% (3/467)	0.35% (39/11223)	0.235	0.603	1
││ └ xiphoid process foramen	MP:0004679	0.43% (2/467)	0.02% (2/11223)	0.009	0.131	1
│├ abnormal long bone morphology	MP:0003723	3.64% (17/467)	4.47% (502/11223)	0.834	0.985	1
││├ abnormal clavicle morphology	MP:0005298	0.86% (4/467)	0.22% (25/11223)	0.027	0.236	1
││└ abnormal limb long bone morphology	MP:0011504	2.36% (11/467)	3.49% (392/11223)	0.933	1	1
││ └ abnormal femur morphology	MP:0000559	1.28% (6/467)	1.33% (149/11223)	0.59	0.906	1
││ └ abnormal femur compact bone thickness	MP:0013622	0.43% (2/467)	0.06% (7/11223)	0.048	0.279	1
││ └ decreased femur compact bone thickness	MP:0013624	0.43% (2/467)	0.05% (6/11223)	0.038	0.26	1
│└ abnormal limb bone morphology	MP:0002115	2.78% (13/467)	3.63% (407/11223)	0.863	0.988	1
│ └ abnormal limb long bone morphology	MP:0011504	2.36% (11/467)	3.49% (392/11223)	0.933	1	1
│ └ abnormal femur morphology	MP:0000559	1.28% (6/467)	1.33% (149/11223)	0.59	0.906	1
│ └ abnormal femur compact bone thickness	MP:0013622	0.43% (2/467)	0.06% (7/11223)	0.048	0.279	1
│ └ decreased femur compact bone thickness	MP:0013624	0.43% (2/467)	0.05% (6/11223)	0.038	0.26	1
├ abnormal skeleton development	MP:0002113	3.21% (15/467)	3.43% (385/11223)	0.638	1	1
│├ abnormal fontanelle morphology	MP:0000084	0.86% (4/467)	0.13% (15/11223)	0.006	0.1	1
││└ small fontanelles	MP:0030389	0.21% (1/467)	0.0% (0/11223)	0.04	1	1
│├ abnormal osteoblast differentiation	MP:0008395	0.64% (3/467)	0.42% (47/11223)	0.323	0.691	1
││└ enhanced osteoblast differentiation	MP:0011710	0.43% (2/467)	0.05% (6/11223)	0.038	0.252	1
│└ abnormal osteoid morphology	MP:0010924	0.21% (1/467)	0.12% (13/11223)	0.435	1	1
│ ├ abnormal osteoid thickness	MP:0010928	0.21% (1/467)	0.04% (5/11223)	0.217	1	1
│ │└ decreased osteoid thickness	MP:0010930	0.21% (1/467)	0.0% (0/11223)	0.04	1	1
│ └ abnormal osteoid volume	MP:0010925	0.21% (1/467)	0.06% (7/11223)	0.278	1	1
│ └ decreased osteoid volume	MP:0010927	0.21% (1/467)	0.0% (0/11223)	0.04	1	1
└ abnormal bone structure	MP:0003795	7.49% (35/467)	7.99% (897/11223)	0.677	1	1
├ abnormal osteoblast morphology	MP:0004986	1.28% (6/467)	1.02% (115/11223)	0.354	0.72	1
│└ abnormal osteoblast differentiation	MP:0008395	0.64% (3/467)	0.42% (47/11223)	0.323	0.642	1
│ └ enhanced osteoblast differentiation	MP:0011710	0.43% (2/467)	0.05% (6/11223)	0.038	0.316	1
└ abnormal compact bone morphology	MP:0003797	1.07% (5/467)	1.29% (145/11223)	0.721	0.939	1
└ abnormal compact bone thickness	MP:0000134	1.07% (5/467)	0.94% (106/11223)	0.457	0.745	1
├ abnormal femur compact bone thickness	MP:0013622	0.43% (2/467)	0.06% (7/11223)	0.048	0.329	1
│└ decreased femur compact bone thickness	MP:0013624	0.43% (2/467)	0.05% (6/11223)	0.038	0.244	1
└ decreased compact bone thickness	MP:0000135	0.86% (4/467)	0.63% (71/11223)	0.352	0.733	1
└ decreased femur compact bone thickness	MP:0013624	0.43% (2/467)	0.05% (6/11223)	0.038	0.244	1
■ adipose tissue phenotype	MP:0005375	7.28% (34/467)	8.1% (909/11223)	0.762	1	1
├ abnormal adipose tissue physiology	MP:0005666	1.28% (6/467)	0.82% (92/11223)	0.198	0.676	1
│└ abnormal brown adipose tissue physiology	MP:0011698	0.64% (3/467)	0.12% (14/11223)	0.028	0.214	1
└ abnormal adipose tissue morphology	MP:0000003	7.07% (33/467)	7.94% (891/11223)	0.777	1	1
├ abnormal fat pad morphology	MP:0005334	2.14% (10/467)	2.11% (237/11223)	0.529	0.966	1
│└ abnormal interscapular fat pad morphology	MP:0006320	0.64% (3/467)	0.16% (18/11223)	0.049	0.298	1
├ abnormal brown adipose tissue morphology	MP:0002971	1.07% (5/467)	1.03% (116/11223)	0.534	0.966	1
│└ abnormal brown adipose tissue amount	MP:0001778	0.86% (4/467)	0.58% (65/11223)	0.297	0.661	1
│ └ decreased brown adipose tissue amount	MP:0001780	0.86% (4/467)	0.26% (29/11223)	0.041	0.265	1
└ abnormal adipose tissue amount	MP:0005452	4.93% (23/467)	6.07% (681/11223)	0.87	1	1
└ abnormal brown adipose tissue amount	MP:0001778	0.86% (4/467)	0.58% (65/11223)	0.297	0.661	1
└ decreased brown adipose tissue amount	MP:0001780	0.86% (4/467)	0.26% (29/11223)	0.041	0.265	1
■ digestive/alimentary phenotype	MP:0005381	9.21% (43/467)	10.43% (1171/11223)	0.823	1	1
└ abnormal digestive system morphology	MP:0000462	8.14% (38/467)	7.87% (883/11223)	0.442	0.967	1
├ increased alimentary system tumor incidence	MP:0010292	1.07% (5/467)	0.37% (42/11223)	0.039	0.266	1
│└ increased gastrointestinal tumor incidence	MP:0010279	1.07% (5/467)	0.34% (38/11223)	0.028	0.229	1
│ └ increased intestinal adenocarcinoma incidence	MP:0002957	0.86% (4/467)	0.14% (16/11223)	0.007	0.119	1
├ abnormal palate morphology	MP:0003755	2.57% (12/467)	2.21% (248/11223)	0.346	0.849	1
│├ abnormal palate development	MP:0009653	1.5% (7/467)	0.87% (98/11223)	0.127	0.443	1
││└ abnormal secondary palate development	MP:0009655	1.28% (6/467)	0.85% (95/11223)	0.216	0.531	1
││ └ abnormal palatal shelf fusion at midline	MP:0009887	1.28% (6/467)	0.53% (60/11223)	0.048	0.329	1
│├ cleft palate	MP:0000111	2.57% (12/467)	1.93% (217/11223)	0.206	0.545	1
││└ cleft secondary palate	MP:0009890	1.71% (8/467)	1.04% (117/11223)	0.127	0.423	1
││ └ cleft hard palate	MP:0013545	1.28% (6/467)	0.69% (77/11223)	0.114	0.481	1
││ └ abnormal palatal shelf fusion at midline	MP:0009887	1.28% (6/467)	0.53% (60/11223)	0.048	0.279	1
│└ abnormal secondary palate morphology	MP:0013550	1.71% (8/467)	1.25% (140/11223)	0.24	0.575	1
│ ├ cleft secondary palate	MP:0009890	1.71% (8/467)	1.04% (117/11223)	0.127	0.423	1
│ │└ cleft hard palate	MP:0013545	1.28% (6/467)	0.69% (77/11223)	0.114	0.481	1
│ │ └ abnormal palatal shelf fusion at midline	MP:0009887	1.28% (6/467)	0.53% (60/11223)	0.048	0.279	1
│ └ abnormal hard palate morphology	MP:0003756	1.5% (7/467)	0.93% (104/11223)	0.156	0.448	1
│ └ cleft hard palate	MP:0013545	1.28% (6/467)	0.69% (77/11223)	0.114	0.481	1
│ └ abnormal palatal shelf fusion at midline	MP:0009887	1.28% (6/467)	0.53% (60/11223)	0.048	0.279	1
├ abnormal stomach morphology	MP:0000470	0.86% (4/467)	1.42% (159/11223)	0.895	1	1
│└ abnormal stomach fundus morphology	MP:0010778	0.21% (1/467)	0.01% (1/11223)	0.078	1	1
│ └ stomach fundus hypertrophy	MP:0010786	0.21% (1/467)	0.0% (0/11223)	0.04	1	1
└ abnormal tongue morphology	MP:0000762	0.43% (2/467)	0.85% (95/11223)	0.904	1	1
└ abnormal tongue muscle morphology	MP:0004136	0.21% (1/467)	0.11% (12/11223)	0.412	1	1
└ tongue muscle hypoplasia	MP:0030421	0.21% (1/467)	0.0% (0/11223)	0.04	1	1
■ endocrine/exocrine gland phenotype	MP:0005379	16.49% (77/467)	18.29% (2053/11223)	0.854	1	1
├ abnormal gland physiology	MP:0002164	4.93% (23/467)	4.98% (559/11223)	0.553	1	1
│├ abnormal endocrine gland physiology	MP:0013561	3.85% (18/467)	2.55% (286/11223)	0.062	0.33	1
││└ abnormal endocrine pancreas physiology	MP:0010147	2.36% (11/467)	1.31% (147/11223)	0.052	0.307	1
││ └ abnormal pancreatic beta cell physiology	MP:0003562	2.36% (11/467)	1.26% (141/11223)	0.041	0.265	1
│└ abnormal pancreas physiology	MP:0002693	3.0% (14/467)	2.15% (241/11223)	0.143	0.558	1
│ └ abnormal endocrine pancreas physiology	MP:0010147	2.36% (11/467)	1.31% (147/11223)	0.052	0.307	1
│ └ abnormal pancreatic beta cell physiology	MP:0003562	2.36% (11/467)	1.26% (141/11223)	0.041	0.265	1
└ abnormal gland morphology	MP:0002163	14.78% (69/467)	16.58% (1861/11223)	0.864	1	1
├ abnormal endocrine gland morphology	MP:0013560	6.85% (32/467)	6.85% (769/11223)	0.527	0.966	1
│├ abnormal ultimobranchial body morphology	MP:0003955	0.21% (1/467)	0.04% (5/11223)	0.217	1	1
││└ persistent ultimobranchial bodies	MP:0013290	0.21% (1/467)	0.0% (0/11223)	0.04	1	1
│├ abnormal neuroendocrine gland morphology	MP:0000631	1.71% (8/467)	1.28% (144/11223)	0.262	0.611	1
││└ abnormal pituitary gland morphology	MP:0000633	1.28% (6/467)	1.1% (124/11223)	0.419	0.72	1
││ ├ abnormal pituitary gland size	MP:0008936	0.64% (3/467)	0.34% (38/11223)	0.224	0.591	1
││ │└ enlarged pituitary gland	MP:0000636	0.64% (3/467)	0.07% (8/11223)	0.008	0.131	1
││ └ abnormal adenohypophysis morphology	MP:0004163	1.07% (5/467)	0.86% (96/11223)	0.378	0.753	1
││ └ abnormal thyrotroph morphology	MP:0008326	0.64% (3/467)	0.11% (12/11223)	0.02	0.208	1
││ └ increased thyrotroph cell number	MP:0008337	0.43% (2/467)	0.04% (4/11223)	0.021	0.19	1
│└ abnormal thyroid gland morphology	MP:0000681	0.86% (4/467)	0.61% (68/11223)	0.324	0.691	1
│ ├ abnormal thyroid gland development	MP:0003421	0.64% (3/467)	0.09% (10/11223)	0.013	0.166	1
│ │├ abnormal thyroid diverticulum morphology	MP:0004662	0.21% (1/467)	0.0% (0/11223)	0.04	1	1
│ │└ abnormal ultimobranchial body morphology	MP:0003955	0.21% (1/467)	0.04% (5/11223)	0.217	1	1
│ │ └ persistent ultimobranchial bodies	MP:0013290	0.21% (1/467)	0.0% (0/11223)	0.04	1	1
│ └ abnormal thyroid follicle morphology	MP:0004696	0.43% (2/467)	0.18% (20/11223)	0.219	0.531	1
│ └ abnormal thyroid follicular cell morphology	MP:0004697	0.21% (1/467)	0.05% (6/11223)	0.248	1	1
│ └ absent thyroid follicular cells	MP:0004660	0.21% (1/467)	0.0% (0/11223)	0.04	1	1
├ abnormal pancreas morphology	MP:0001944	1.71% (8/467)	2.25% (253/11223)	0.824	1	1
│└ abnormal pancreas development	MP:0003934	0.21% (1/467)	0.29% (33/11223)	0.75	1	1
│ └ abnormal pancreas mesenchyme morphology	MP:0011265	0.21% (1/467)	0.0% (0/11223)	0.04	1	1
└ abnormal sex gland morphology	MP:0000653	6.85% (32/467)	8.29% (930/11223)	0.885	1	1
├ abnormal female reproductive gland morphology	MP:0013324	2.57% (12/467)	2.78% (312/11223)	0.648	0.893	1
│└ abnormal ovary morphology	MP:0001126	2.57% (12/467)	2.59% (291/11223)	0.554	0.824	1
│ └ abnormal ovary size	MP:0004853	1.28% (6/467)	1.44% (162/11223)	0.667	0.948	1
│ └ enlarged ovary	MP:0004832	0.43% (2/467)	0.12% (14/11223)	0.132	0.453	1
│ └ ovary hyperplasia	MP:0001128	0.43% (2/467)	0.04% (4/11223)	0.021	0.19	1
└ abnormal male reproductive gland morphology	MP:0013325	6.0% (28/467)	7.14% (801/11223)	0.85	0.986	1
└ abnormal testis morphology	MP:0001146	5.57% (26/467)	5.81% (652/11223)	0.616	0.86	1
└ abnormal seminiferous tubule morphology	MP:0002216	3.64% (17/467)	2.72% (305/11223)	0.147	0.493	1
├ seminiferous tubule degeneration	MP:0001154	1.93% (9/467)	0.69% (77/11223)	0.007	0.131	1
└ abnormal seminiferous tubule epithelium morphology	MP:0011750	1.71% (8/467)	0.78% (88/11223)	0.038	0.244	1
└ abnormal Sertoli cell morphology	MP:0002784	1.28% (6/467)	0.57% (64/11223)	0.06	0.323	1
└ Sertoli cell hypoplasia	MP:0005250	0.43% (2/467)	0.05% (6/11223)	0.038	0.204	1
■ vision/eye phenotype	MP:0005391	11.13% (52/467)	12.69% (1424/11223)	0.856	1	1
└ abnormal eye morphology	MP:0002092	10.49% (49/467)	11.55% (1296/11223)	0.779	1	1
└ abnormal eyelid morphology	MP:0001340	2.36% (11/467)	1.65% (185/11223)	0.162	0.585	1
└ abnormal timing of postnatal eyelid opening	MP:0004874	1.07% (5/467)	0.47% (53/11223)	0.081	0.384	1
└ delayed eyelid opening	MP:0001290	1.07% (5/467)	0.23% (26/11223)	0.007	0.119	1
■ integument phenotype	MP:0010771	12.42% (58/467)	14.37% (1613/11223)	0.896	1	1
└ abnormal skin morphology	MP:0002060	6.42% (30/467)	7.27% (816/11223)	0.781	1	1
├ abnormal skin appearance	MP:0009931	4.28% (20/467)	3.53% (396/11223)	0.226	0.71	1
│└ blotchy skin	MP:0002897	0.21% (1/467)	0.0% (0/11223)	0.04	1	1
└ abnormal epidermal layer morphology	MP:0001216	1.5% (7/467)	2.27% (255/11223)	0.904	1	1
└ abnormal epidermis stratum granulosum morphology	MP:0001239	0.64% (3/467)	0.59% (66/11223)	0.524	0.836	1
└ abnormal keratohyalin granule morphology	MP:0009602	0.64% (3/467)	0.09% (10/11223)	0.013	0.166	1
└ decreased keratohyalin granule number	MP:0009605	0.64% (3/467)	0.03% (3/11223)	0.001	0.039	0.631
└ absent keratohyalin granules	MP:0009603	0.43% (2/467)	0.01% (1/11223)	0.005	1	1
■ respiratory system phenotype	MP:0005388	8.99% (42/467)	10.72% (1203/11223)	0.899	1	1
├ abnormal respiratory system physiology	MP:0002133	6.0% (28/467)	6.62% (743/11223)	0.73	1	1
│├ abnormal surfactant physiology	MP:0004782	0.86% (4/467)	0.32% (36/11223)	0.074	0.363	1
││└ abnormal surfactant secretion	MP:0004780	0.86% (4/467)	0.2% (23/11223)	0.021	0.199	1
│└ abnormal respiration	MP:0001943	5.14% (24/467)	4.2% (471/11223)	0.189	0.638	1
│ └ abnormal respiratory function	MP:0002327	3.43% (16/467)	2.81% (315/11223)	0.251	0.595	1
│ └ abnormal breathing pattern	MP:0001951	3.21% (15/467)	2.2% (247/11223)	0.103	0.376	1
│ └ respiratory distress	MP:0001954	2.78% (13/467)	1.6% (180/11223)	0.046	0.329	1
└ abnormal respiratory system morphology	MP:0002132	4.28% (20/467)	6.97% (782/11223)	0.993	1	1
├ abnormal larynx morphology	MP:0002249	0.64% (3/467)	0.32% (36/11223)	0.203	0.664	1
│└ abnormal laryngeal cartilage morphology	MP:0002256	0.64% (3/467)	0.22% (25/11223)	0.099	0.41	1
│ └ abnormal cricoid cartilage morphology	MP:0002258	0.43% (2/467)	0.11% (12/11223)	0.106	0.376	1
│ └ cricoid and tracheal cartilage fusion	MP:0009438	0.21% (1/467)	0.0% (0/11223)	0.04	1	1
├ abnormal respiratory system development	MP:0003115	1.71% (8/467)	1.26% (141/11223)	0.246	0.739	1
│└ abnormal lung development	MP:0001176	1.71% (8/467)	1.13% (127/11223)	0.172	0.506	1
│ └ abnormal lung alveolus development	MP:0010995	1.07% (5/467)	0.37% (41/11223)	0.036	0.252	1
│ └ impaired lung alveolus development	MP:0006027	1.07% (5/467)	0.32% (36/11223)	0.023	0.296	1
├ abnormal trachea morphology	MP:0002282	0.43% (2/467)	0.57% (64/11223)	0.747	1	1
│├ trachea occlusion	MP:0013497	0.21% (1/467)	0.0% (0/11223)	0.04	1	1
│└ abnormal tracheal cartilage morphology	MP:0003120	0.21% (1/467)	0.2% (23/11223)	0.624	1	1
│ └ cricoid and tracheal cartilage fusion	MP:0009438	0.21% (1/467)	0.0% (0/11223)	0.04	1	1
└ abnormal lung morphology	MP:0001175	3.0% (14/467)	4.74% (532/11223)	0.975	1	1
├ pale lung	MP:0010887	0.43% (2/467)	0.03% (3/11223)	0.015	0.172	1
└ abnormal lung development	MP:0001176	1.71% (8/467)	1.13% (127/11223)	0.172	0.506	1
└ abnormal lung alveolus development	MP:0010995	1.07% (5/467)	0.37% (41/11223)	0.036	0.252	1
└ impaired lung alveolus development	MP:0006027	1.07% (5/467)	0.32% (36/11223)	0.023	0.296	1
■ limbs/digits/tail phenotype	MP:0005371	6.0% (28/467)	7.56% (849/11223)	0.915	1	1
└ abnormal limb morphology	MP:0002109	4.5% (21/467)	5.94% (667/11223)	0.924	1	1
├ abnormal limb bone morphology	MP:0002115	2.78% (13/467)	3.63% (407/11223)	0.863	1	1
│└ abnormal limb long bone morphology	MP:0011504	2.36% (11/467)	3.49% (392/11223)	0.933	1	1
│ └ abnormal femur morphology	MP:0000559	1.28% (6/467)	1.33% (149/11223)	0.59	0.844	1
│ └ abnormal femur compact bone thickness	MP:0013622	0.43% (2/467)	0.06% (7/11223)	0.048	0.329	1
│ └ decreased femur compact bone thickness	MP:0013624	0.43% (2/467)	0.05% (6/11223)	0.038	0.244	1
├ abnormal hindlimb morphology	MP:0000556	2.36% (11/467)	3.23% (362/11223)	0.886	1	1
│└ abnormal hindlimb stylopod morphology	MP:0003856	1.28% (6/467)	1.35% (151/11223)	0.602	0.874	1
│ └ abnormal femur morphology	MP:0000559	1.28% (6/467)	1.33% (149/11223)	0.59	0.844	1
│ └ abnormal femur compact bone thickness	MP:0013622	0.43% (2/467)	0.06% (7/11223)	0.048	0.329	1
│ └ decreased femur compact bone thickness	MP:0013624	0.43% (2/467)	0.05% (6/11223)	0.038	0.244	1
└ abnormal autopod morphology	MP:0000572	1.28% (6/467)	2.36% (265/11223)	0.963	1	1
└ abnormal digit morphology	MP:0002110	0.86% (4/467)	1.94% (218/11223)	0.979	1	1
└ macrodactyly	MP:0013149	0.21% (1/467)	0.0% (0/11223)	0.04	1	1
■ neoplasm	MP:0002006	3.85% (18/467)	5.21% (585/11223)	0.925	1	1
└ altered tumor susceptibility	MP:0002166	3.43% (16/467)	4.52% (507/11223)	0.895	1	1
└ abnormal tumor incidence	MP:0002019	3.43% (16/467)	4.34% (487/11223)	0.859	1	1
├ abnormal classified tumor incidence	MP:0020188	2.36% (11/467)	2.41% (271/11223)	0.576	0.865	1
│├ decreased classified tumor incidence	MP:0010283	0.21% (1/467)	0.02% (2/11223)	0.115	1	1
││└ decreased leukemia incidence	MP:0011995	0.21% (1/467)	0.0% (0/11223)	0.04	1	1
│└ increased classified tumor incidence	MP:0010273	2.14% (10/467)	2.41% (271/11223)	0.691	0.914	1
│ └ increased malignant tumor incidence	MP:0002018	1.28% (6/467)	1.55% (174/11223)	0.73	0.979	1
│ └ increased carcinoma incidence	MP:0002038	1.07% (5/467)	1.34% (150/11223)	0.747	0.999	1
│ └ increased adenocarcinoma incidence	MP:0009308	0.86% (4/467)	0.62% (70/11223)	0.343	0.733	1
│ └ increased intestinal adenocarcinoma incidence	MP:0002957	0.86% (4/467)	0.14% (16/11223)	0.007	0.087	1
├ decreased tumor incidence	MP:0002052	0.86% (4/467)	0.98% (110/11223)	0.673	0.913	1
│└ decreased classified tumor incidence	MP:0010283	0.21% (1/467)	0.02% (2/11223)	0.115	1	1
│ └ decreased leukemia incidence	MP:0011995	0.21% (1/467)	0.0% (0/11223)	0.04	1	1
├ abnormal organ/body region tumor incidence	MP:0013152	2.36% (11/467)	2.62% (294/11223)	0.679	0.914	1
│└ increased organ/body region tumor incidence	MP:0010274	2.36% (11/467)	2.58% (290/11223)	0.662	0.892	1
│ └ increased alimentary system tumor incidence	MP:0010292	1.07% (5/467)	0.37% (42/11223)	0.039	0.32	1
│ └ increased gastrointestinal tumor incidence	MP:0010279	1.07% (5/467)	0.34% (38/11223)	0.028	0.222	1
│ └ increased intestinal adenocarcinoma incidence	MP:0002957	0.86% (4/467)	0.14% (16/11223)	0.007	0.109	1
└ increased tumor incidence	MP:0002020	2.57% (12/467)	3.39% (381/11223)	0.867	0.988	1
├ increased organ/body region tumor incidence	MP:0010274	2.36% (11/467)	2.58% (290/11223)	0.662	0.892	1
│└ increased alimentary system tumor incidence	MP:0010292	1.07% (5/467)	0.37% (42/11223)	0.039	0.32	1
│ └ increased gastrointestinal tumor incidence	MP:0010279	1.07% (5/467)	0.34% (38/11223)	0.028	0.222	1
│ └ increased intestinal adenocarcinoma incidence	MP:0002957	0.86% (4/467)	0.14% (16/11223)	0.007	0.109	1
└ increased classified tumor incidence	MP:0010273	2.14% (10/467)	2.41% (271/11223)	0.691	0.914	1
└ increased malignant tumor incidence	MP:0002018	1.28% (6/467)	1.55% (174/11223)	0.73	0.979	1
└ increased carcinoma incidence	MP:0002038	1.07% (5/467)	1.34% (150/11223)	0.747	0.999	1
└ increased adenocarcinoma incidence	MP:0009308	0.86% (4/467)	0.62% (70/11223)	0.343	0.733	1
└ increased intestinal adenocarcinoma incidence	MP:0002957	0.86% (4/467)	0.14% (16/11223)	0.007	0.087	1
■ renal/urinary system phenotype	MP:0005367	7.49% (35/467)	10.26% (1152/11223)	0.982	1	1
├ abnormal renal/urinary system morphology	MP:0000516	6.42% (30/467)	7.85% (881/11223)	0.89	1	1
│└ abnormal kidney morphology	MP:0002135	6.0% (28/467)	7.13% (800/11223)	0.848	1	1
│ ├ absent kidney	MP:0000520	1.5% (7/467)	0.46% (52/11223)	0.009	0.131	1
│ └ abnormal kidney medulla morphology	MP:0003014	0.43% (2/467)	0.42% (47/11223)	0.588	0.873	1
│ └ abnormal kidney outer medulla morphology	MP:0011332	0.21% (1/467)	0.02% (2/11223)	0.115	1	1
│ └ abnormal kidney outer medulla inner stripe morphology	MP:0011378	0.21% (1/467)	0.0% (0/11223)	0.04	1	1
└ abnormal renal/urinary system physiology	MP:0005502	2.78% (13/467)	5.63% (632/11223)	0.999	1	1
└ abnormal urination	MP:0001756	0.64% (3/467)	1.23% (138/11223)	0.925	1	1
├ abnormal urination pattern	MP:0001761	0.43% (2/467)	0.02% (2/11223)	0.009	0.131	1
│└ increased urination frequency	MP:0011535	0.43% (2/467)	0.02% (2/11223)	0.009	0.137	1
└ urinary incontinence	MP:0003280	0.43% (2/467)	0.06% (7/11223)	0.048	0.295	1
■ liver/biliary system phenotype	MP:0005370	6.42% (30/467)	10.37% (1164/11223)	0.999	1	1
└ abnormal hepatobiliary system morphology	MP:0002138	6.0% (28/467)	9.0% (1010/11223)	0.992	1	1
└ abnormal liver morphology	MP:0000598	5.78% (27/467)	8.28% (929/11223)	0.982	1	1
└ abnormal liver parenchyma morphology	MP:0008986	1.28% (6/467)	1.81% (203/11223)	0.847	0.986	1
└ abnormal liver lobule morphology	MP:0008987	1.28% (6/467)	1.7% (191/11223)	0.804	0.967	1
└ abnormal hepatocyte morphology	MP:0000607	1.07% (5/467)	1.05% (118/11223)	0.548	0.878	1
└ decreased hepatocyte number	MP:0000606	0.64% (3/467)	0.12% (13/11223)	0.024	0.222	1
■ homeostasis/metabolism phenotype	MP:0005376	30.84% (144/467)	40.8% (4579/11223)	1	1	1
├ abnormal response to injury	MP:0005164	3.21% (15/467)	4.25% (477/11223)	0.891	1	1
│├ altered response of heart to induced stress	MP:0004484	1.07% (5/467)	0.64% (72/11223)	0.194	0.641	1
││└ decreased response of heart to induced stress	MP:0004486	0.86% (4/467)	0.2% (22/11223)	0.019	0.199	1
│└ decreased susceptibility to injury	MP:0005166	1.28% (6/467)	1.19% (133/11223)	0.483	0.954	1
│ └ decreased response of heart to induced stress	MP:0004486	0.86% (4/467)	0.2% (22/11223)	0.019	0.199	1
├ abnormal homeostasis	MP:0001764	25.05% (117/467)	35.26% (3957/11223)	1	1	1
│├ abnormal fluid regulation	MP:0001784	7.07% (33/467)	5.84% (655/11223)	0.157	0.585	1
││├ pericardial effusion	MP:0005312	1.71% (8/467)	0.86% (96/11223)	0.056	0.312	1
│││└ hemopericardium	MP:0005244	1.07% (5/467)	0.37% (41/11223)	0.036	0.252	1
││└ edema	MP:0001785	5.14% (24/467)	3.8% (426/11223)	0.091	0.402	1
││ └ pericardial edema	MP:0001787	1.5% (7/467)	0.62% (70/11223)	0.034	0.251	1
│├ abnormal gas homeostasis	MP:0003948	4.28% (20/467)	4.01% (450/11223)	0.418	0.901	1
││└ abnormal oxygen level	MP:0001574	3.0% (14/467)	1.99% (223/11223)	0.093	0.402	1
││ └ cyanosis	MP:0001575	3.0% (14/467)	1.76% (197/11223)	0.044	0.271	1
│├ abnormal hormone level	MP:0003953	7.49% (35/467)	8.01% (899/11223)	0.682	1	1
││├ abnormal pituitary hormone level	MP:0003965	1.71% (8/467)	1.56% (175/11223)	0.449	0.784	1
│││├ abnormal thyroid-stimulating hormone level	MP:0003971	0.86% (4/467)	0.21% (24/11223)	0.024	0.236	1
││││└ increased thyroid-stimulating hormone level	MP:0005135	0.64% (3/467)	0.12% (14/11223)	0.028	0.296	1
│││└ increased pituitary hormone level	MP:0003973	1.07% (5/467)	0.93% (104/11223)	0.442	0.739	1
│││ └ increased thyroid-stimulating hormone level	MP:0005135	0.64% (3/467)	0.12% (14/11223)	0.028	0.296	1
││└ abnormal circulating hormone level	MP:0005418	6.21% (29/467)	7.11% (798/11223)	0.796	0.974	1
││ └ abnormal circulating leptin level	MP:0005667	2.14% (10/467)	1.59% (178/11223)	0.22	0.531	1
││ └ decreased circulating leptin level	MP:0005668	1.93% (9/467)	0.85% (95/11223)	0.023	0.296	1
│└ abnormal blood homeostasis	MP:0009642	16.49% (77/467)	25.62% (2875/11223)	1	1	1
│ ├ cyanosis	MP:0001575	3.0% (14/467)	1.76% (197/11223)	0.044	0.286	1
│ └ abnormal circulating hormone level	MP:0005418	6.21% (29/467)	7.11% (798/11223)	0.796	0.974	1
│ └ abnormal circulating leptin level	MP:0005667	2.14% (10/467)	1.59% (178/11223)	0.22	0.531	1
│ └ decreased circulating leptin level	MP:0005668	1.93% (9/467)	0.85% (95/11223)	0.023	0.296	1
└ abnormal metabolism	MP:0005266	3.0% (14/467)	6.43% (722/11223)	1	1	1
└ abnormal enzyme/coenzyme activity	MP:0005584	0.64% (3/467)	1.91% (214/11223)	0.993	1	1
├ abnormal triglyceride lipase activity	MP:0011580	0.43% (2/467)	0.06% (7/11223)	0.048	0.295	1
│├ decreased triglyceride lipase activity	MP:0011582	0.43% (2/467)	0.03% (3/11223)	0.015	0.189	1
││└ decreased lipoprotein lipase activity	MP:0011579	0.43% (2/467)	0.02% (2/11223)	0.009	0.177	1
│└ abnormal lipoprotein lipase activity	MP:0011577	0.43% (2/467)	0.04% (5/11223)	0.029	0.236	1
│ └ decreased lipoprotein lipase activity	MP:0011579	0.43% (2/467)	0.02% (2/11223)	0.009	0.177	1
└ abnormal hormone-sensitive lipase activity	MP:0011589	0.21% (1/467)	0.01% (1/11223)	0.078	1	1
└ decreased hormone-sensitive lipase activity	MP:0011591	0.21% (1/467)	0.0% (0/11223)	0.04	1	1
■ immune system phenotype	MP:0005387	17.56% (82/467)	29.98% (3365/11223)	1	1	1
├ abnormal immune system morphology	MP:0000685	14.13% (66/467)	21.56% (2420/11223)	1	1	1
│├ abnormal immune system organ morphology	MP:0002722	8.14% (38/467)	10.79% (1211/11223)	0.974	1	1
││├ abnormal lymph organ development	MP:0002450	0.43% (2/467)	0.19% (21/11223)	0.234	0.563	1
│││└ abnormal bone marrow development	MP:0000168	0.43% (2/467)	0.04% (5/11223)	0.029	0.236	1
││└ abnormal lymph organ size	MP:0002221	6.64% (31/467)	7.85% (881/11223)	0.853	0.986	1
││ └ small lymphoid organs	MP:0000687	0.64% (3/467)	0.09% (10/11223)	0.013	0.166	1
││ └ lymphoid hypoplasia	MP:0002223	0.64% (3/467)	0.09% (10/11223)	0.013	0.222	1
│└ abnormal immune system cell morphology	MP:0000716	9.85% (46/467)	17.11% (1920/11223)	1	1	1
│ ├ abnormal leukopoiesis	MP:0005460	4.07% (19/467)	5.0% (561/11223)	0.846	0.986	1
│ │└ abnormal lymphopoiesis	MP:0002401	3.64% (17/467)	4.4% (494/11223)	0.816	0.971	1
│ │ └ abnormal B cell differentiation	MP:0002144	1.71% (8/467)	2.45% (275/11223)	0.883	1	1
│ │ └ abnormal somatic hypermutation frequency	MP:0004815	0.64% (3/467)	0.11% (12/11223)	0.02	0.208	1
│ └ abnormal leukocyte morphology	MP:0008246	9.85% (46/467)	16.95% (1902/11223)	1	1	1
│ ├ abnormal myeloid leukocyte morphology	MP:0008250	4.5% (21/467)	7.72% (866/11223)	0.998	1	1
│ │└ abnormal phagocyte morphology	MP:0008251	4.28% (20/467)	6.58% (738/11223)	0.985	1	1
│ │ └ abnormal mononuclear phagocyte morphology	MP:0008248	3.64% (17/467)	4.87% (546/11223)	0.911	1	1
│ │ └ abnormal monocyte morphology	MP:0002620	2.14% (10/467)	1.69% (190/11223)	0.278	0.646	1
│ │ └ abnormal monocyte cell number	MP:0012441	2.14% (10/467)	1.68% (188/11223)	0.268	0.702	1
│ │ ├ abnormal Ly6C high monocyte number	MP:0013021	0.64% (3/467)	0.08% (9/11223)	0.011	0.12	1
│ │ │└ decreased Ly6C high monocyte number	MP:0013023	0.43% (2/467)	0.02% (2/11223)	0.009	0.072	0.432
│ │ ├ abnormal Ly6C low monocyte number	MP:0013024	0.64% (3/467)	0.12% (14/11223)	0.028	0.21	1
│ │ └ decreased monocyte cell number	MP:0000223	1.07% (5/467)	0.64% (72/11223)	0.194	0.629	1
│ │ └ decreased Ly6C high monocyte number	MP:0013023	0.43% (2/467)	0.02% (2/11223)	0.009	0.072	0.432
│ ├ abnormal leukocyte cell number	MP:0000217	8.14% (38/467)	15.07% (1691/11223)	1	1	1
│ │├ abnormal monocyte cell number	MP:0012441	2.14% (10/467)	1.68% (188/11223)	0.268	0.631	1
│ ││├ abnormal Ly6C high monocyte number	MP:0013021	0.64% (3/467)	0.08% (9/11223)	0.011	0.145	1
│ │││└ decreased Ly6C high monocyte number	MP:0013023	0.43% (2/467)	0.02% (2/11223)	0.009	0.11	1
│ ││├ abnormal Ly6C low monocyte number	MP:0013024	0.64% (3/467)	0.12% (14/11223)	0.028	0.222	1
│ ││└ decreased monocyte cell number	MP:0000223	1.07% (5/467)	0.64% (72/11223)	0.194	0.529	1
│ ││ └ decreased Ly6C high monocyte number	MP:0013023	0.43% (2/467)	0.02% (2/11223)	0.009	0.11	1
│ │├ increased leukocyte cell number	MP:0000218	4.5% (21/467)	9.67% (1085/11223)	1	1	1
│ ││└ increased lymphocyte cell number	MP:0005013	3.0% (14/467)	6.91% (776/11223)	1	1	1
│ ││ └ increased T cell number	MP:0005015	2.57% (12/467)	4.5% (505/11223)	0.988	1	1
│ ││ └ increased gamma-delta T cell number	MP:0008346	0.43% (2/467)	0.29% (33/11223)	0.411	0.899	1
│ ││ └ increased KLRG1-positive gamma-delta T cell number	MP:0013424	0.21% (1/467)	0.0% (0/11223)	0.04	1	1
│ │├ decreased leukocyte cell number	MP:0000221	6.21% (29/467)	10.67% (1198/11223)	1	1	1
│ ││├ decreased monocyte cell number	MP:0000223	1.07% (5/467)	0.64% (72/11223)	0.194	0.529	1
│ │││└ decreased Ly6C high monocyte number	MP:0013023	0.43% (2/467)	0.02% (2/11223)	0.009	0.11	1
│ ││└ decreased lymphocyte cell number	MP:0005016	4.71% (22/467)	8.38% (940/11223)	0.999	1	1
│ ││ └ decreased NK cell number	MP:0008045	1.07% (5/467)	0.98% (110/11223)	0.488	0.877	1
│ ││ └ decreased memory-marker NK cell number	MP:0013426	0.43% (2/467)	0.04% (4/11223)	0.021	0.144	1
│ │└ abnormal lymphocyte cell number	MP:0000717	6.0% (28/467)	11.01% (1236/11223)	1	1	1
│ │ ├ abnormal NK cell number	MP:0008043	1.07% (5/467)	1.49% (167/11223)	0.823	1	1
│ │ │├ abnormal memory-marker NK cell number	MP:0013425	0.43% (2/467)	0.1% (11/11223)	0.093	0.389	1
│ │ ││└ decreased memory-marker NK cell number	MP:0013426	0.43% (2/467)	0.04% (4/11223)	0.021	0.144	1
│ │ │└ decreased NK cell number	MP:0008045	1.07% (5/467)	0.98% (110/11223)	0.488	0.877	1
│ │ │ └ decreased memory-marker NK cell number	MP:0013426	0.43% (2/467)	0.04% (4/11223)	0.021	0.144	1
│ │ ├ abnormal T cell number	MP:0006387	4.93% (23/467)	7.85% (881/11223)	0.994	1	1
│ │ │├ abnormal gamma-delta T cell number	MP:0008345	0.86% (4/467)	0.56% (63/11223)	0.279	0.646	1
│ │ ││├ abnormal KLRG1-positive gamma-delta T cell number	MP:0013422	0.21% (1/467)	0.0% (0/11223)	0.04	1	1
│ │ │││└ increased KLRG1-positive gamma-delta T cell number	MP:0013424	0.21% (1/467)	0.0% (0/11223)	0.04	1	1
│ │ ││└ increased gamma-delta T cell number	MP:0008346	0.43% (2/467)	0.29% (33/11223)	0.411	0.899	1
│ │ ││ └ increased KLRG1-positive gamma-delta T cell number	MP:0013424	0.21% (1/467)	0.0% (0/11223)	0.04	1	1
│ │ │└ increased T cell number	MP:0005015	2.57% (12/467)	4.5% (505/11223)	0.988	1	1
│ │ │ └ increased gamma-delta T cell number	MP:0008346	0.43% (2/467)	0.29% (33/11223)	0.411	0.899	1
│ │ │ └ increased KLRG1-positive gamma-delta T cell number	MP:0013424	0.21% (1/467)	0.0% (0/11223)	0.04	1	1
│ │ ├ decreased lymphocyte cell number	MP:0005016	4.71% (22/467)	8.38% (940/11223)	0.999	1	1
│ │ │└ decreased NK cell number	MP:0008045	1.07% (5/467)	0.98% (110/11223)	0.488	0.877	1
│ │ │ └ decreased memory-marker NK cell number	MP:0013426	0.43% (2/467)	0.04% (4/11223)	0.021	0.144	1
│ │ └ increased lymphocyte cell number	MP:0005013	3.0% (14/467)	6.91% (776/11223)	1	1	1
│ │ └ increased T cell number	MP:0005015	2.57% (12/467)	4.5% (505/11223)	0.988	1	1
│ │ └ increased gamma-delta T cell number	MP:0008346	0.43% (2/467)	0.29% (33/11223)	0.411	0.899	1
│ │ └ increased KLRG1-positive gamma-delta T cell number	MP:0013424	0.21% (1/467)	0.0% (0/11223)	0.04	1	1
│ └ abnormal mononuclear cell morphology	MP:0008247	8.99% (42/467)	14.49% (1626/11223)	1	1	1
│ ├ abnormal mononuclear phagocyte morphology	MP:0008248	3.64% (17/467)	4.87% (546/11223)	0.911	1	1
│ │└ abnormal monocyte morphology	MP:0002620	2.14% (10/467)	1.69% (190/11223)	0.278	0.611	1
│ │ └ abnormal monocyte cell number	MP:0012441	2.14% (10/467)	1.68% (188/11223)	0.268	0.641	1
│ │ ├ abnormal Ly6C high monocyte number	MP:0013021	0.64% (3/467)	0.08% (9/11223)	0.011	0.104	1
│ │ │└ decreased Ly6C high monocyte number	MP:0013023	0.43% (2/467)	0.02% (2/11223)	0.009	0.12	1
│ │ ├ abnormal Ly6C low monocyte number	MP:0013024	0.64% (3/467)	0.12% (14/11223)	0.028	0.18	1
│ │ └ decreased monocyte cell number	MP:0000223	1.07% (5/467)	0.64% (72/11223)	0.194	0.576	1
│ │ └ decreased Ly6C high monocyte number	MP:0013023	0.43% (2/467)	0.02% (2/11223)	0.009	0.12	1
│ └ abnormal lymphocyte morphology	MP:0002619	7.49% (35/467)	11.82% (1326/11223)	0.999	1	1
│ ├ abnormal lymphopoiesis	MP:0002401	3.64% (17/467)	4.4% (494/11223)	0.816	1	1
│ │└ abnormal B cell differentiation	MP:0002144	1.71% (8/467)	2.45% (275/11223)	0.883	1	1
│ │ └ abnormal somatic hypermutation frequency	MP:0004815	0.64% (3/467)	0.11% (12/11223)	0.02	0.144	1
│ ├ abnormal NK cell morphology	MP:0005068	1.07% (5/467)	1.54% (173/11223)	0.844	1	1
│ │└ abnormal NK cell number	MP:0008043	1.07% (5/467)	1.49% (167/11223)	0.823	1	1
│ │ ├ abnormal memory-marker NK cell number	MP:0013425	0.43% (2/467)	0.1% (11/11223)	0.093	0.356	1
│ │ │└ decreased memory-marker NK cell number	MP:0013426	0.43% (2/467)	0.04% (4/11223)	0.021	0.18	1
│ │ └ decreased NK cell number	MP:0008045	1.07% (5/467)	0.98% (110/11223)	0.488	0.94	1
│ │ └ decreased memory-marker NK cell number	MP:0013426	0.43% (2/467)	0.04% (4/11223)	0.021	0.18	1
│ ├ abnormal B cell morphology	MP:0004939	3.85% (18/467)	5.47% (614/11223)	0.953	1	1
│ │└ abnormal B cell differentiation	MP:0002144	1.71% (8/467)	2.45% (275/11223)	0.883	1	1
│ │ └ abnormal somatic hypermutation frequency	MP:0004815	0.64% (3/467)	0.11% (12/11223)	0.02	0.144	1
│ ├ abnormal T cell morphology	MP:0008037	5.35% (25/467)	8.37% (939/11223)	0.994	1	1
│ │├ abnormal gamma-delta T cell morphology	MP:0008343	0.86% (4/467)	0.77% (86/11223)	0.487	0.877	1
│ ││└ abnormal gamma-delta T cell number	MP:0008345	0.86% (4/467)	0.56% (63/11223)	0.279	0.712	1
│ ││ ├ abnormal KLRG1-positive gamma-delta T cell number	MP:0013422	0.21% (1/467)	0.0% (0/11223)	0.04	1	1
│ ││ │└ increased KLRG1-positive gamma-delta T cell number	MP:0013424	0.21% (1/467)	0.0% (0/11223)	0.04	1	1
│ ││ └ increased gamma-delta T cell number	MP:0008346	0.43% (2/467)	0.29% (33/11223)	0.411	0.943	1
│ ││ └ increased KLRG1-positive gamma-delta T cell number	MP:0013424	0.21% (1/467)	0.0% (0/11223)	0.04	1	1
│ │└ abnormal T cell number	MP:0006387	4.93% (23/467)	7.85% (881/11223)	0.994	1	1
│ │ ├ abnormal gamma-delta T cell number	MP:0008345	0.86% (4/467)	0.56% (63/11223)	0.279	0.712	1
│ │ │├ abnormal KLRG1-positive gamma-delta T cell number	MP:0013422	0.21% (1/467)	0.0% (0/11223)	0.04	1	1
│ │ ││└ increased KLRG1-positive gamma-delta T cell number	MP:0013424	0.21% (1/467)	0.0% (0/11223)	0.04	1	1
│ │ │└ increased gamma-delta T cell number	MP:0008346	0.43% (2/467)	0.29% (33/11223)	0.411	0.943	1
│ │ │ └ increased KLRG1-positive gamma-delta T cell number	MP:0013424	0.21% (1/467)	0.0% (0/11223)	0.04	1	1
│ │ └ increased T cell number	MP:0005015	2.57% (12/467)	4.5% (505/11223)	0.988	1	1
│ │ └ increased gamma-delta T cell number	MP:0008346	0.43% (2/467)	0.29% (33/11223)	0.411	0.943	1
│ │ └ increased KLRG1-positive gamma-delta T cell number	MP:0013424	0.21% (1/467)	0.0% (0/11223)	0.04	1	1
│ └ abnormal lymphocyte cell number	MP:0000717	6.0% (28/467)	11.01% (1236/11223)	1	1	1
│ ├ abnormal NK cell number	MP:0008043	1.07% (5/467)	1.49% (167/11223)	0.823	1	1
│ │├ abnormal memory-marker NK cell number	MP:0013425	0.43% (2/467)	0.1% (11/11223)	0.093	0.356	1
│ ││└ decreased memory-marker NK cell number	MP:0013426	0.43% (2/467)	0.04% (4/11223)	0.021	0.18	1
│ │└ decreased NK cell number	MP:0008045	1.07% (5/467)	0.98% (110/11223)	0.488	0.94	1
│ │ └ decreased memory-marker NK cell number	MP:0013426	0.43% (2/467)	0.04% (4/11223)	0.021	0.18	1
│ ├ abnormal T cell number	MP:0006387	4.93% (23/467)	7.85% (881/11223)	0.994	1	1
│ │├ abnormal gamma-delta T cell number	MP:0008345	0.86% (4/467)	0.56% (63/11223)	0.279	0.712	1
│ ││├ abnormal KLRG1-positive gamma-delta T cell number	MP:0013422	0.21% (1/467)	0.0% (0/11223)	0.04	1	1
│ │││└ increased KLRG1-positive gamma-delta T cell number	MP:0013424	0.21% (1/467)	0.0% (0/11223)	0.04	1	1
│ ││└ increased gamma-delta T cell number	MP:0008346	0.43% (2/467)	0.29% (33/11223)	0.411	0.943	1
│ ││ └ increased KLRG1-positive gamma-delta T cell number	MP:0013424	0.21% (1/467)	0.0% (0/11223)	0.04	1	1
│ │└ increased T cell number	MP:0005015	2.57% (12/467)	4.5% (505/11223)	0.988	1	1
│ │ └ increased gamma-delta T cell number	MP:0008346	0.43% (2/467)	0.29% (33/11223)	0.411	0.943	1
│ │ └ increased KLRG1-positive gamma-delta T cell number	MP:0013424	0.21% (1/467)	0.0% (0/11223)	0.04	1	1
│ ├ decreased lymphocyte cell number	MP:0005016	4.71% (22/467)	8.38% (940/11223)	0.999	1	1
│ │└ decreased NK cell number	MP:0008045	1.07% (5/467)	0.98% (110/11223)	0.488	0.94	1
│ │ └ decreased memory-marker NK cell number	MP:0013426	0.43% (2/467)	0.04% (4/11223)	0.021	0.18	1
│ └ increased lymphocyte cell number	MP:0005013	3.0% (14/467)	6.91% (776/11223)	1	1	1
│ └ increased T cell number	MP:0005015	2.57% (12/467)	4.5% (505/11223)	0.988	1	1
│ └ increased gamma-delta T cell number	MP:0008346	0.43% (2/467)	0.29% (33/11223)	0.411	0.943	1
│ └ increased KLRG1-positive gamma-delta T cell number	MP:0013424	0.21% (1/467)	0.0% (0/11223)	0.04	1	1
└ abnormal immune system physiology	MP:0001790	9.42% (44/467)	21.21% (2380/11223)	1	1	1
└ abnormal adaptive immunity	MP:0002420	7.49% (35/467)	13.68% (1535/11223)	1	1	1
└ abnormal somatic hypermutation frequency	MP:0004815	0.64% (3/467)	0.11% (12/11223)	0.02	0.199	1
■ hematopoietic system phenotype	MP:0005397	21.2% (99/467)	29.26% (3284/11223)	1	1	1
└ abnormal hematopoietic system morphology/development	MP:0002396	17.99% (84/467)	25.51% (2863/11223)	1	1	1
├ abnormal blood cell morphology/development	MP:0002429	7.71% (36/467)	8.46% (950/11223)	0.742	1	1
│└ abnormal hemopoiesis	MP:0013693	6.21% (29/467)	7.32% (821/11223)	0.84	0.985	1
│ └ abnormal definitive hematopoiesis	MP:0002123	5.78% (27/467)	7.03% (789/11223)	0.873	1	1
│ └ abnormal leukopoiesis	MP:0005460	4.07% (19/467)	5.0% (561/11223)	0.846	0.997	1
│ └ abnormal lymphopoiesis	MP:0002401	3.64% (17/467)	4.4% (494/11223)	0.816	1	1
│ └ abnormal B cell differentiation	MP:0002144	1.71% (8/467)	2.45% (275/11223)	0.883	1	1
│ └ abnormal somatic hypermutation frequency	MP:0004815	0.64% (3/467)	0.11% (12/11223)	0.02	0.144	1
└ abnormal hematopoietic cell morphology	MP:0013656	14.35% (67/467)	22.47% (2522/11223)	1	1	1
├ abnormal blood cell morphology	MP:0013657	11.35% (53/467)	14.92% (1675/11223)	0.988	1	1
│└ abnormal hemopoiesis	MP:0013693	6.21% (29/467)	7.32% (821/11223)	0.84	0.976	1
│ └ abnormal definitive hematopoiesis	MP:0002123	5.78% (27/467)	7.03% (789/11223)	0.873	1	1
│ └ abnormal leukopoiesis	MP:0005460	4.07% (19/467)	5.0% (561/11223)	0.846	1	1
│ └ abnormal lymphopoiesis	MP:0002401	3.64% (17/467)	4.4% (494/11223)	0.816	1	1
│ └ abnormal B cell differentiation	MP:0002144	1.71% (8/467)	2.45% (275/11223)	0.883	1	1
│ └ abnormal somatic hypermutation frequency	MP:0004815	0.64% (3/467)	0.11% (12/11223)	0.02	0.18	1
├ abnormal myeloid cell morphology	MP:0013658	9.42% (44/467)	13.97% (1568/11223)	0.999	1	1
│└ abnormal myeloid leukocyte morphology	MP:0008250	4.5% (21/467)	7.72% (866/11223)	0.998	1	1
│ └ abnormal phagocyte morphology	MP:0008251	4.28% (20/467)	6.58% (738/11223)	0.985	1	1
│ └ abnormal mononuclear phagocyte morphology	MP:0008248	3.64% (17/467)	4.87% (546/11223)	0.911	1	1
│ └ abnormal monocyte morphology	MP:0002620	2.14% (10/467)	1.69% (190/11223)	0.278	0.646	1
│ └ abnormal monocyte cell number	MP:0012441	2.14% (10/467)	1.68% (188/11223)	0.268	0.702	1
│ ├ abnormal Ly6C high monocyte number	MP:0013021	0.64% (3/467)	0.08% (9/11223)	0.011	0.12	1
│ │└ decreased Ly6C high monocyte number	MP:0013023	0.43% (2/467)	0.02% (2/11223)	0.009	0.072	0.432
│ ├ abnormal Ly6C low monocyte number	MP:0013024	0.64% (3/467)	0.12% (14/11223)	0.028	0.21	1
│ └ decreased monocyte cell number	MP:0000223	1.07% (5/467)	0.64% (72/11223)	0.194	0.629	1
│ └ decreased Ly6C high monocyte number	MP:0013023	0.43% (2/467)	0.02% (2/11223)	0.009	0.072	0.432
├ abnormal leukocyte morphology	MP:0008246	9.85% (46/467)	16.95% (1902/11223)	1	1	1
│├ abnormal myeloid leukocyte morphology	MP:0008250	4.5% (21/467)	7.72% (866/11223)	0.998	1	1
││└ abnormal phagocyte morphology	MP:0008251	4.28% (20/467)	6.58% (738/11223)	0.985	1	1
││ └ abnormal mononuclear phagocyte morphology	MP:0008248	3.64% (17/467)	4.87% (546/11223)	0.911	1	1
││ └ abnormal monocyte morphology	MP:0002620	2.14% (10/467)	1.69% (190/11223)	0.278	0.646	1
││ └ abnormal monocyte cell number	MP:0012441	2.14% (10/467)	1.68% (188/11223)	0.268	0.702	1
││ ├ abnormal Ly6C high monocyte number	MP:0013021	0.64% (3/467)	0.08% (9/11223)	0.011	0.12	1
││ │└ decreased Ly6C high monocyte number	MP:0013023	0.43% (2/467)	0.02% (2/11223)	0.009	0.072	0.432
││ ├ abnormal Ly6C low monocyte number	MP:0013024	0.64% (3/467)	0.12% (14/11223)	0.028	0.21	1
││ └ decreased monocyte cell number	MP:0000223	1.07% (5/467)	0.64% (72/11223)	0.194	0.629	1
││ └ decreased Ly6C high monocyte number	MP:0013023	0.43% (2/467)	0.02% (2/11223)	0.009	0.072	0.432
│├ abnormal leukocyte cell number	MP:0000217	8.14% (38/467)	15.07% (1691/11223)	1	1	1
││├ abnormal monocyte cell number	MP:0012441	2.14% (10/467)	1.68% (188/11223)	0.268	0.631	1
│││├ abnormal Ly6C high monocyte number	MP:0013021	0.64% (3/467)	0.08% (9/11223)	0.011	0.145	1
││││└ decreased Ly6C high monocyte number	MP:0013023	0.43% (2/467)	0.02% (2/11223)	0.009	0.11	1
│││├ abnormal Ly6C low monocyte number	MP:0013024	0.64% (3/467)	0.12% (14/11223)	0.028	0.222	1
│││└ decreased monocyte cell number	MP:0000223	1.07% (5/467)	0.64% (72/11223)	0.194	0.529	1
│││ └ decreased Ly6C high monocyte number	MP:0013023	0.43% (2/467)	0.02% (2/11223)	0.009	0.11	1
││├ increased leukocyte cell number	MP:0000218	4.5% (21/467)	9.67% (1085/11223)	1	1	1
│││└ increased lymphocyte cell number	MP:0005013	3.0% (14/467)	6.91% (776/11223)	1	1	1
│││ └ increased T cell number	MP:0005015	2.57% (12/467)	4.5% (505/11223)	0.988	1	1
│││ └ increased gamma-delta T cell number	MP:0008346	0.43% (2/467)	0.29% (33/11223)	0.411	0.899	1
│││ └ increased KLRG1-positive gamma-delta T cell number	MP:0013424	0.21% (1/467)	0.0% (0/11223)	0.04	1	1
││├ decreased leukocyte cell number	MP:0000221	6.21% (29/467)	10.67% (1198/11223)	1	1	1
│││├ decreased monocyte cell number	MP:0000223	1.07% (5/467)	0.64% (72/11223)	0.194	0.529	1
││││└ decreased Ly6C high monocyte number	MP:0013023	0.43% (2/467)	0.02% (2/11223)	0.009	0.11	1
│││└ decreased lymphocyte cell number	MP:0005016	4.71% (22/467)	8.38% (940/11223)	0.999	1	1
│││ └ decreased NK cell number	MP:0008045	1.07% (5/467)	0.98% (110/11223)	0.488	0.877	1
│││ └ decreased memory-marker NK cell number	MP:0013426	0.43% (2/467)	0.04% (4/11223)	0.021	0.144	1
││└ abnormal lymphocyte cell number	MP:0000717	6.0% (28/467)	11.01% (1236/11223)	1	1	1
││ ├ abnormal NK cell number	MP:0008043	1.07% (5/467)	1.49% (167/11223)	0.823	1	1
││ │├ abnormal memory-marker NK cell number	MP:0013425	0.43% (2/467)	0.1% (11/11223)	0.093	0.389	1
││ ││└ decreased memory-marker NK cell number	MP:0013426	0.43% (2/467)	0.04% (4/11223)	0.021	0.144	1
││ │└ decreased NK cell number	MP:0008045	1.07% (5/467)	0.98% (110/11223)	0.488	0.877	1
││ │ └ decreased memory-marker NK cell number	MP:0013426	0.43% (2/467)	0.04% (4/11223)	0.021	0.144	1
││ ├ abnormal T cell number	MP:0006387	4.93% (23/467)	7.85% (881/11223)	0.994	1	1
││ │├ abnormal gamma-delta T cell number	MP:0008345	0.86% (4/467)	0.56% (63/11223)	0.279	0.646	1
││ ││├ abnormal KLRG1-positive gamma-delta T cell number	MP:0013422	0.21% (1/467)	0.0% (0/11223)	0.04	1	1
││ │││└ increased KLRG1-positive gamma-delta T cell number	MP:0013424	0.21% (1/467)	0.0% (0/11223)	0.04	1	1
││ ││└ increased gamma-delta T cell number	MP:0008346	0.43% (2/467)	0.29% (33/11223)	0.411	0.899	1
││ ││ └ increased KLRG1-positive gamma-delta T cell number	MP:0013424	0.21% (1/467)	0.0% (0/11223)	0.04	1	1
││ │└ increased T cell number	MP:0005015	2.57% (12/467)	4.5% (505/11223)	0.988	1	1
││ │ └ increased gamma-delta T cell number	MP:0008346	0.43% (2/467)	0.29% (33/11223)	0.411	0.899	1
││ │ └ increased KLRG1-positive gamma-delta T cell number	MP:0013424	0.21% (1/467)	0.0% (0/11223)	0.04	1	1
││ ├ decreased lymphocyte cell number	MP:0005016	4.71% (22/467)	8.38% (940/11223)	0.999	1	1
││ │└ decreased NK cell number	MP:0008045	1.07% (5/467)	0.98% (110/11223)	0.488	0.877	1
││ │ └ decreased memory-marker NK cell number	MP:0013426	0.43% (2/467)	0.04% (4/11223)	0.021	0.144	1
││ └ increased lymphocyte cell number	MP:0005013	3.0% (14/467)	6.91% (776/11223)	1	1	1
││ └ increased T cell number	MP:0005015	2.57% (12/467)	4.5% (505/11223)	0.988	1	1
││ └ increased gamma-delta T cell number	MP:0008346	0.43% (2/467)	0.29% (33/11223)	0.411	0.899	1
││ └ increased KLRG1-positive gamma-delta T cell number	MP:0013424	0.21% (1/467)	0.0% (0/11223)	0.04	1	1
│└ abnormal mononuclear cell morphology	MP:0008247	8.99% (42/467)	14.49% (1626/11223)	1	1	1
│ ├ abnormal mononuclear phagocyte morphology	MP:0008248	3.64% (17/467)	4.87% (546/11223)	0.911	1	1
│ │└ abnormal monocyte morphology	MP:0002620	2.14% (10/467)	1.69% (190/11223)	0.278	0.611	1
│ │ └ abnormal monocyte cell number	MP:0012441	2.14% (10/467)	1.68% (188/11223)	0.268	0.641	1
│ │ ├ abnormal Ly6C high monocyte number	MP:0013021	0.64% (3/467)	0.08% (9/11223)	0.011	0.104	1
│ │ │└ decreased Ly6C high monocyte number	MP:0013023	0.43% (2/467)	0.02% (2/11223)	0.009	0.12	1
│ │ ├ abnormal Ly6C low monocyte number	MP:0013024	0.64% (3/467)	0.12% (14/11223)	0.028	0.18	1
│ │ └ decreased monocyte cell number	MP:0000223	1.07% (5/467)	0.64% (72/11223)	0.194	0.576	1
│ │ └ decreased Ly6C high monocyte number	MP:0013023	0.43% (2/467)	0.02% (2/11223)	0.009	0.12	1
│ └ abnormal lymphocyte morphology	MP:0002619	7.49% (35/467)	11.82% (1326/11223)	0.999	1	1
│ ├ abnormal lymphopoiesis	MP:0002401	3.64% (17/467)	4.4% (494/11223)	0.816	1	1
│ │└ abnormal B cell differentiation	MP:0002144	1.71% (8/467)	2.45% (275/11223)	0.883	1	1
│ │ └ abnormal somatic hypermutation frequency	MP:0004815	0.64% (3/467)	0.11% (12/11223)	0.02	0.144	1
│ ├ abnormal NK cell morphology	MP:0005068	1.07% (5/467)	1.54% (173/11223)	0.844	1	1
│ │└ abnormal NK cell number	MP:0008043	1.07% (5/467)	1.49% (167/11223)	0.823	1	1
│ │ ├ abnormal memory-marker NK cell number	MP:0013425	0.43% (2/467)	0.1% (11/11223)	0.093	0.356	1
│ │ │└ decreased memory-marker NK cell number	MP:0013426	0.43% (2/467)	0.04% (4/11223)	0.021	0.18	1
│ │ └ decreased NK cell number	MP:0008045	1.07% (5/467)	0.98% (110/11223)	0.488	0.94	1
│ │ └ decreased memory-marker NK cell number	MP:0013426	0.43% (2/467)	0.04% (4/11223)	0.021	0.18	1
│ ├ abnormal B cell morphology	MP:0004939	3.85% (18/467)	5.47% (614/11223)	0.953	1	1
│ │└ abnormal B cell differentiation	MP:0002144	1.71% (8/467)	2.45% (275/11223)	0.883	1	1
│ │ └ abnormal somatic hypermutation frequency	MP:0004815	0.64% (3/467)	0.11% (12/11223)	0.02	0.144	1
│ ├ abnormal T cell morphology	MP:0008037	5.35% (25/467)	8.37% (939/11223)	0.994	1	1
│ │├ abnormal gamma-delta T cell morphology	MP:0008343	0.86% (4/467)	0.77% (86/11223)	0.487	0.877	1
│ ││└ abnormal gamma-delta T cell number	MP:0008345	0.86% (4/467)	0.56% (63/11223)	0.279	0.712	1
│ ││ ├ abnormal KLRG1-positive gamma-delta T cell number	MP:0013422	0.21% (1/467)	0.0% (0/11223)	0.04	1	1
│ ││ │└ increased KLRG1-positive gamma-delta T cell number	MP:0013424	0.21% (1/467)	0.0% (0/11223)	0.04	1	1
│ ││ └ increased gamma-delta T cell number	MP:0008346	0.43% (2/467)	0.29% (33/11223)	0.411	0.943	1
│ ││ └ increased KLRG1-positive gamma-delta T cell number	MP:0013424	0.21% (1/467)	0.0% (0/11223)	0.04	1	1
│ │└ abnormal T cell number	MP:0006387	4.93% (23/467)	7.85% (881/11223)	0.994	1	1
│ │ ├ abnormal gamma-delta T cell number	MP:0008345	0.86% (4/467)	0.56% (63/11223)	0.279	0.712	1
│ │ │├ abnormal KLRG1-positive gamma-delta T cell number	MP:0013422	0.21% (1/467)	0.0% (0/11223)	0.04	1	1
│ │ ││└ increased KLRG1-positive gamma-delta T cell number	MP:0013424	0.21% (1/467)	0.0% (0/11223)	0.04	1	1
│ │ │└ increased gamma-delta T cell number	MP:0008346	0.43% (2/467)	0.29% (33/11223)	0.411	0.943	1
│ │ │ └ increased KLRG1-positive gamma-delta T cell number	MP:0013424	0.21% (1/467)	0.0% (0/11223)	0.04	1	1
│ │ └ increased T cell number	MP:0005015	2.57% (12/467)	4.5% (505/11223)	0.988	1	1
│ │ └ increased gamma-delta T cell number	MP:0008346	0.43% (2/467)	0.29% (33/11223)	0.411	0.943	1
│ │ └ increased KLRG1-positive gamma-delta T cell number	MP:0013424	0.21% (1/467)	0.0% (0/11223)	0.04	1	1
│ └ abnormal lymphocyte cell number	MP:0000717	6.0% (28/467)	11.01% (1236/11223)	1	1	1
│ ├ abnormal NK cell number	MP:0008043	1.07% (5/467)	1.49% (167/11223)	0.823	1	1
│ │├ abnormal memory-marker NK cell number	MP:0013425	0.43% (2/467)	0.1% (11/11223)	0.093	0.356	1
│ ││└ decreased memory-marker NK cell number	MP:0013426	0.43% (2/467)	0.04% (4/11223)	0.021	0.18	1
│ │└ decreased NK cell number	MP:0008045	1.07% (5/467)	0.98% (110/11223)	0.488	0.94	1
│ │ └ decreased memory-marker NK cell number	MP:0013426	0.43% (2/467)	0.04% (4/11223)	0.021	0.18	1
│ ├ abnormal T cell number	MP:0006387	4.93% (23/467)	7.85% (881/11223)	0.994	1	1
│ │├ abnormal gamma-delta T cell number	MP:0008345	0.86% (4/467)	0.56% (63/11223)	0.279	0.712	1
│ ││├ abnormal KLRG1-positive gamma-delta T cell number	MP:0013422	0.21% (1/467)	0.0% (0/11223)	0.04	1	1
│ │││└ increased KLRG1-positive gamma-delta T cell number	MP:0013424	0.21% (1/467)	0.0% (0/11223)	0.04	1	1
│ ││└ increased gamma-delta T cell number	MP:0008346	0.43% (2/467)	0.29% (33/11223)	0.411	0.943	1
│ ││ └ increased KLRG1-positive gamma-delta T cell number	MP:0013424	0.21% (1/467)	0.0% (0/11223)	0.04	1	1
│ │└ increased T cell number	MP:0005015	2.57% (12/467)	4.5% (505/11223)	0.988	1	1
│ │ └ increased gamma-delta T cell number	MP:0008346	0.43% (2/467)	0.29% (33/11223)	0.411	0.943	1
│ │ └ increased KLRG1-positive gamma-delta T cell number	MP:0013424	0.21% (1/467)	0.0% (0/11223)	0.04	1	1
│ ├ decreased lymphocyte cell number	MP:0005016	4.71% (22/467)	8.38% (940/11223)	0.999	1	1
│ │└ decreased NK cell number	MP:0008045	1.07% (5/467)	0.98% (110/11223)	0.488	0.94	1
│ │ └ decreased memory-marker NK cell number	MP:0013426	0.43% (2/467)	0.04% (4/11223)	0.021	0.18	1
│ └ increased lymphocyte cell number	MP:0005013	3.0% (14/467)	6.91% (776/11223)	1	1	1
│ └ increased T cell number	MP:0005015	2.57% (12/467)	4.5% (505/11223)	0.988	1	1
│ └ increased gamma-delta T cell number	MP:0008346	0.43% (2/467)	0.29% (33/11223)	0.411	0.943	1
│ └ increased KLRG1-positive gamma-delta T cell number	MP:0013424	0.21% (1/467)	0.0% (0/11223)	0.04	1	1
└ abnormal hematopoietic cell number	MP:0011180	10.71% (50/467)	17.46% (1960/11223)	1	1	1
├ decreased hematopoietic cell number	MP:0011182	8.35% (39/467)	12.71% (1426/11223)	0.999	1	1
│└ decreased leukocyte cell number	MP:0000221	6.21% (29/467)	10.67% (1198/11223)	1	1	1
│ ├ decreased monocyte cell number	MP:0000223	1.07% (5/467)	0.64% (72/11223)	0.194	0.529	1
│ │└ decreased Ly6C high monocyte number	MP:0013023	0.43% (2/467)	0.02% (2/11223)	0.009	0.11	1
│ └ decreased lymphocyte cell number	MP:0005016	4.71% (22/467)	8.38% (940/11223)	0.999	1	1
│ └ decreased NK cell number	MP:0008045	1.07% (5/467)	0.98% (110/11223)	0.488	0.877	1
│ └ decreased memory-marker NK cell number	MP:0013426	0.43% (2/467)	0.04% (4/11223)	0.021	0.144	1
├ abnormal leukocyte cell number	MP:0000217	8.14% (38/467)	15.07% (1691/11223)	1	1	1
│├ abnormal monocyte cell number	MP:0012441	2.14% (10/467)	1.68% (188/11223)	0.268	0.631	1
││├ abnormal Ly6C high monocyte number	MP:0013021	0.64% (3/467)	0.08% (9/11223)	0.011	0.145	1
│││└ decreased Ly6C high monocyte number	MP:0013023	0.43% (2/467)	0.02% (2/11223)	0.009	0.11	1
││├ abnormal Ly6C low monocyte number	MP:0013024	0.64% (3/467)	0.12% (14/11223)	0.028	0.222	1
││└ decreased monocyte cell number	MP:0000223	1.07% (5/467)	0.64% (72/11223)	0.194	0.529	1
││ └ decreased Ly6C high monocyte number	MP:0013023	0.43% (2/467)	0.02% (2/11223)	0.009	0.11	1
│├ increased leukocyte cell number	MP:0000218	4.5% (21/467)	9.67% (1085/11223)	1	1	1
││└ increased lymphocyte cell number	MP:0005013	3.0% (14/467)	6.91% (776/11223)	1	1	1
││ └ increased T cell number	MP:0005015	2.57% (12/467)	4.5% (505/11223)	0.988	1	1
││ └ increased gamma-delta T cell number	MP:0008346	0.43% (2/467)	0.29% (33/11223)	0.411	0.899	1
││ └ increased KLRG1-positive gamma-delta T cell number	MP:0013424	0.21% (1/467)	0.0% (0/11223)	0.04	1	1
│├ decreased leukocyte cell number	MP:0000221	6.21% (29/467)	10.67% (1198/11223)	1	1	1
││├ decreased monocyte cell number	MP:0000223	1.07% (5/467)	0.64% (72/11223)	0.194	0.529	1
│││└ decreased Ly6C high monocyte number	MP:0013023	0.43% (2/467)	0.02% (2/11223)	0.009	0.11	1
││└ decreased lymphocyte cell number	MP:0005016	4.71% (22/467)	8.38% (940/11223)	0.999	1	1
││ └ decreased NK cell number	MP:0008045	1.07% (5/467)	0.98% (110/11223)	0.488	0.877	1
││ └ decreased memory-marker NK cell number	MP:0013426	0.43% (2/467)	0.04% (4/11223)	0.021	0.144	1
│└ abnormal lymphocyte cell number	MP:0000717	6.0% (28/467)	11.01% (1236/11223)	1	1	1
│ ├ abnormal NK cell number	MP:0008043	1.07% (5/467)	1.49% (167/11223)	0.823	1	1
│ │├ abnormal memory-marker NK cell number	MP:0013425	0.43% (2/467)	0.1% (11/11223)	0.093	0.389	1
│ ││└ decreased memory-marker NK cell number	MP:0013426	0.43% (2/467)	0.04% (4/11223)	0.021	0.144	1
│ │└ decreased NK cell number	MP:0008045	1.07% (5/467)	0.98% (110/11223)	0.488	0.877	1
│ │ └ decreased memory-marker NK cell number	MP:0013426	0.43% (2/467)	0.04% (4/11223)	0.021	0.144	1
│ ├ abnormal T cell number	MP:0006387	4.93% (23/467)	7.85% (881/11223)	0.994	1	1
│ │├ abnormal gamma-delta T cell number	MP:0008345	0.86% (4/467)	0.56% (63/11223)	0.279	0.646	1
│ ││├ abnormal KLRG1-positive gamma-delta T cell number	MP:0013422	0.21% (1/467)	0.0% (0/11223)	0.04	1	1
│ │││└ increased KLRG1-positive gamma-delta T cell number	MP:0013424	0.21% (1/467)	0.0% (0/11223)	0.04	1	1
│ ││└ increased gamma-delta T cell number	MP:0008346	0.43% (2/467)	0.29% (33/11223)	0.411	0.899	1
│ ││ └ increased KLRG1-positive gamma-delta T cell number	MP:0013424	0.21% (1/467)	0.0% (0/11223)	0.04	1	1
│ │└ increased T cell number	MP:0005015	2.57% (12/467)	4.5% (505/11223)	0.988	1	1
│ │ └ increased gamma-delta T cell number	MP:0008346	0.43% (2/467)	0.29% (33/11223)	0.411	0.899	1
│ │ └ increased KLRG1-positive gamma-delta T cell number	MP:0013424	0.21% (1/467)	0.0% (0/11223)	0.04	1	1
│ ├ decreased lymphocyte cell number	MP:0005016	4.71% (22/467)	8.38% (940/11223)	0.999	1	1
│ │└ decreased NK cell number	MP:0008045	1.07% (5/467)	0.98% (110/11223)	0.488	0.877	1
│ │ └ decreased memory-marker NK cell number	MP:0013426	0.43% (2/467)	0.04% (4/11223)	0.021	0.144	1
│ └ increased lymphocyte cell number	MP:0005013	3.0% (14/467)	6.91% (776/11223)	1	1	1
│ └ increased T cell number	MP:0005015	2.57% (12/467)	4.5% (505/11223)	0.988	1	1
│ └ increased gamma-delta T cell number	MP:0008346	0.43% (2/467)	0.29% (33/11223)	0.411	0.899	1
│ └ increased KLRG1-positive gamma-delta T cell number	MP:0013424	0.21% (1/467)	0.0% (0/11223)	0.04	1	1
└ increased hematopoietic cell number	MP:0011181	5.57% (26/467)	11.11% (1247/11223)	1	1	1
└ increased leukocyte cell number	MP:0000218	4.5% (21/467)	9.67% (1085/11223)	1	1	1
└ increased lymphocyte cell number	MP:0005013	3.0% (14/467)	6.91% (776/11223)	1	1	1
└ increased T cell number	MP:0005015	2.57% (12/467)	4.5% (505/11223)	0.988	1	1
└ increased gamma-delta T cell number	MP:0008346	0.43% (2/467)	0.29% (33/11223)	0.411	0.899	1
└ increased KLRG1-positive gamma-delta T cell number	MP:0013424	0.21% (1/467)	0.0% (0/11223)	0.04	1	1
